# Supplementary material for: The burden of prostate cancer in North Africa and Middle East, 1990–2019: Findings from the global burden of disease study
Source: PubMed Central journal article supplement (PMC9513750; doi:10.3389/fonc.2022.961086), 2022-09-13

Supplementary Table 1

| Title                                            | Time period covered | Coverage type | Geography       | Data type        | Secondary data type | Provider                                      | Dataset URL                                                                                               |
|--------------------------------------------------|---------------------|---------------|-----------------|------------------|---------------------|-----------------------------------------------|-----------------------------------------------------------------------------------------------------------|
| Algeria - Algiers Cancer Registry Report 2003    | 01/2003 to 12/2003  | Subnational   | Algeria, Alger  | Disease registry |                     | National Institute of Public Health (Algeria) | <a href="http://www.and.s.dz/insp/registre-tumeurs.htm">http://www.and.s.dz/insp/registre-tumeurs.htm</a> |
| Algeria - Algiers Cancer Registry Report 2004    | 01/2004 to 12/2004  | Subnational   | Algeria, Alger  | Disease registry |                     | National Institute of Public Health (Algeria) | <a href="http://www.and.s.dz/insp/registre-tumeurs.htm">http://www.and.s.dz/insp/registre-tumeurs.htm</a> |
| Algeria - Algiers Cancer Registry Report 2006    | 01/2006 to 12/2006  | Subnational   | Algeria, Alger  | Disease registry |                     | National Institute of Public Health (Algeria) | <a href="http://www.and.s.dz/insp/registre-tumeurs.htm">http://www.and.s.dz/insp/registre-tumeurs.htm</a> |
| Algeria - Algiers Cancer Registry Report 2007    | 01/2007 to 12/2007  | Subnational   | Algeria, Alger  | Disease registry |                     | National Institute of Public Health (Algeria) | <a href="http://www.and.s.dz/insp/registre-tumeurs.htm">http://www.and.s.dz/insp/registre-tumeurs.htm</a> |
| Algeria - Batna Cancer Registry Report 2000-2006 | 01/2000 to 12/2006  | Subnational   | Algeria, Batna  | Disease registry |                     | University Hospital of Batna                  | <a href="http://www.sante.dz/chu-batna/">http://www.sante.dz/chu-batna/</a>                               |
| Algeria - Oran Cancer Registry Report 2005       | 01/2005 to 12/2005  | Subnational   | Algeria, Oran   | Disease registry |                     | Oran Cancer Registry (Algeria)                |                                                                                                           |
| Algeria - Oran Cancer Registry Report 2006       | 01/2006 to 12/2006  | Subnational   | Algeria, Oran   | Disease registry |                     | Oran Cancer Registry (Algeria)                |                                                                                                           |
| Algeria - Setif Cancer Registry 1986-1989 - CI5  | 01/1986 to 12/1989  |               | Algeria, S tiff | Disease registry |                     |                                               |                                                                                                           |
| Algeria - Setif Cancer Registry 1990-1993 - CI5  | 01/1990 to 12/1993  |               | Algeria, S tiff | Disease registry |                     |                                               |                                                                                                           |
| Algeria - Setif Cancer Registry 1998-2002 - CI5  | 01/1998 to 12/2002  |               | Algeria, S tiff | Disease registry |                     |                                               |                                                                                                           |
| Algeria - Setif Cancer Registry 2003-2007 - CI5  | 01/2003 to 12/2007  |               | Algeria, S tiff | Disease registry |                     |                                               |                                                                                                           |
| Algeria - Study of Causes of Death, TAHINA 2002  | 01/2002 to 12/2002  | Country       | Algeria         | Report           | Verbal autopsy      | National Institute of Public Health (Algeria) | <a href="http://www.and.s.dz/insp/tahina.html">http://www.and.s.dz/insp/tahina.html</a>                   |

| Title                                                                                                                                            | Time period covered | Coverage type | Geography                                                        | Data type             | Secondary data type | Provider                                  | Dataset URL                                                                                                                                                                                                                                                                                               |
|--------------------------------------------------------------------------------------------------------------------------------------------------|---------------------|---------------|------------------------------------------------------------------|-----------------------|---------------------|-------------------------------------------|-----------------------------------------------------------------------------------------------------------------------------------------------------------------------------------------------------------------------------------------------------------------------------------------------------------|
| Algeria Tumour Registry of Algiers 1993-1997 - CI5                                                                                               | 01/1993 to 12/1997  |               | Algeria, Alger                                                   | Disease registry      |                     |                                           |                                                                                                                                                                                                                                                                                                           |
| Bahrain Cancer Registry 1998-2002 - CI5                                                                                                          | 01/1998 to 12/2002  |               | Bahrain                                                          | Disease registry      |                     |                                           |                                                                                                                                                                                                                                                                                                           |
| Bahrain Cancer Registry 2003-2007 - CI5                                                                                                          | 01/2003 to 12/2007  |               | Bahrain                                                          | Disease registry      |                     |                                           |                                                                                                                                                                                                                                                                                                           |
| Cancer in Kuwait: magnitude of the problem                                                                                                       | 01/1974 to 12/2007  |               | Bahrain, Kuwait, Oman, Qatar, Saudi Arabia, United Arab Emirates | Scientific literature |                     |                                           |                                                                                                                                                                                                                                                                                                           |
| Cancer incidence in Jordan, 1996-2005                                                                                                            | 01/1996 to 12/2005  |               | Jordan                                                           | Scientific literature |                     |                                           |                                                                                                                                                                                                                                                                                                           |
| Cancer Incidence in Oman 2013                                                                                                                    | 01/2013 to 12/2013  | Country       | Oman                                                             | Disease registry      |                     | Ministry of Health (Oman)                 | <a href="https://internal.moh.gov.om/en/web/general-directorate-of-primary-health-care/resources?p_p_id=2_WAR_kaleodesignerportlet&amp;p_p_lifecycle=0">https://internal.moh.gov.om/en/web/general-directorate-of-primary-health-care/resources?p_p_id=2_WAR_kaleodesignerportlet&amp;p_p_lifecycle=0</a> |
| Cancer Incidence in Postwar Lebanon: Findings from the First National Population-based Registry, 1998                                            | 01/1998 to 12/1998  |               | Lebanon                                                          | Scientific literature |                     |                                           |                                                                                                                                                                                                                                                                                                           |
| Cancer Occurrence in Ardabil: Results of a Population-Based Cancer Registry from Iran                                                            | 01/1996 to 12/1999  | Subnational   | Iran (Islamic Republic of), Ardab  l                             | Scientific literature |                     |                                           |                                                                                                                                                                                                                                                                                                           |
| Declining incidence of esophageal cancer in the Turkmen Plain, eastern part of the Caspian Littoral of Iran: A retrospective cancer surveillance | 01/1996 to 12/2000  | Subnational   | Iran (Islamic Republic of), Golest  n                            | Scientific literature |                     |                                           |                                                                                                                                                                                                                                                                                                           |
| Egypt - Aswan National Cancer Registry Report 2008                                                                                               | 01/2008 to 12/2008  | Subnational   | Egypt, Asw  n                                                    | Disease registry      |                     | National Cancer Registry Program of Egypt | <a href="http://www.cancerregistry.gov.eg/Default.aspx">http://www.cancerregistry.gov.eg/Default.aspx</a>                                                                                                                                                                                                 |
| Egypt - Damietta National Cancer Registry Report 2009                                                                                            | 01/2009 to 12/2009  | Subnational   | Egypt, Dumy  t                                                   | Disease registry      |                     | National Cancer Registry Program of Egypt | <a href="http://www.cancerregistry.gov.eg/Default.aspx">http://www.cancerregistry.gov.eg/Default.aspx</a>                                                                                                                                                                                                 |

| Title                                                     | Time period covered | Coverage type | Geography                            | Data type        | Secondary data type          | Provider                                  | Dataset URL                                                                                               |
|-----------------------------------------------------------|---------------------|---------------|--------------------------------------|------------------|------------------------------|-------------------------------------------|-----------------------------------------------------------------------------------------------------------|
| Egypt - Damietta National Cancer Registry Statistics 2010 | 01/2010 to 12/2010  | Subnational   | Egypt, DumyÄ                        | Disease registry |                              | National Cancer Registry Program of Egypt | <a href="http://www.cancerregistry.gov.eg/">http://www.cancerregistry.gov.eg/</a>                         |
| Egypt - El-Minia National Cancer Registry Report 2009     | 01/2009 to 12/2009  | Subnational   | Egypt, Al MinyÄ                     | Disease registry |                              | National Cancer Registry Program of Egypt | <a href="http://www.cancerregistry.gov.eg/Default.aspx">http://www.cancerregistry.gov.eg/Default.aspx</a> |
| Egypt - Gharbiah Cancer Registry 1999-2002 - CI5          | 01/1999 to 12/2002  |               | Egypt, Al GharbÄ                    | Disease registry |                              |                                           |                                                                                                           |
| Egypt - Gharbiah Cancer Registry 2003-2007 - CI5          | 01/2003 to 12/2007  |               | Egypt, Al GharbÄ                    | Disease registry |                              |                                           |                                                                                                           |
| Iran - Ardabil Cancer Registry Extracts 1985-2008         | 01/1985 to 12/2008  | Subnational   | Iran (Islamic Republic of), ArdabÄ  | Disease registry |                              |                                           |                                                                                                           |
| Iran - Golestan Cancer Registry 2005-2007 - CI5           | 01/2005 to 12/2007  | Subnational   | Iran (Islamic Republic of), GolestÄ | Disease registry |                              |                                           |                                                                                                           |
| Iran - Golestan Cancer Registry Incidence Data 2006-2008  | 01/2006 to 12/2008  | Subnational   | Iran (Islamic Republic of), GolestÄ | Disease registry |                              |                                           |                                                                                                           |
| Iran National Cancer Registry 2000                        | 01/2000 to 12/2000  | Country       | Iran (Islamic Republic of)           | Disease registry | Subnationally representative |                                           |                                                                                                           |
| Iran National Cancer Registry 2001                        | 01/2001 to 12/2001  | Country       | Iran (Islamic Republic of)           | Disease registry | Subnationally representative |                                           |                                                                                                           |
| Iran National Cancer Registry 2002                        | 01/2002 to 12/2002  | Country       | Iran (Islamic Republic of)           | Disease registry | Subnationally representative |                                           |                                                                                                           |
| Iran National Cancer Registry 2003                        | 01/2003 to 12/2003  | Country       | Iran (Islamic Republic of)           | Disease registry | Subnationally representative |                                           |                                                                                                           |

| Title                                          | Time period covered | Coverage type | Geography                  | Data type        | Secondary data type          | Provider | Dataset URL |
|------------------------------------------------|---------------------|---------------|----------------------------|------------------|------------------------------|----------|-------------|
| Iran National Cancer Registry 2004             | 01/2004 to 12/2004  | Country       | Iran (Islamic Republic of) | Disease registry | Subnationally representative |          |             |
| Iran National Cancer Registry 2005             | 01/2005 to 12/2005  | Country       | Iran (Islamic Republic of) | Disease registry | Subnationally representative |          |             |
| Iran National Cancer Registry 2006             | 01/2006 to 12/2006  | Country       | Iran (Islamic Republic of) | Disease registry | Subnationally representative |          |             |
| Iran National Cancer Registry 2007             | 01/2007 to 12/2007  | Country       | Iran (Islamic Republic of) | Disease registry | Subnationally representative |          |             |
| Iran National Cancer Registry 2008             | 01/2008 to 12/2008  | Country       | Iran (Islamic Republic of) | Disease registry | Subnationally representative |          |             |
| Iran National Cancer Registry 2009             | 01/2009 to 12/2009  | Country       | Iran (Islamic Republic of) | Disease registry | Subnationally representative |          |             |
| Iran National Cancer Registry 2010             | 01/2010 to 12/2010  | Country       | Iran (Islamic Republic of) | Disease registry | Subnationally representative |          |             |
| Iran National Cancer Registry Report 2003-2004 | 03/2003 to 02/2004  | Country       | Iran (Islamic Republic of) | Disease registry |                              |          |             |
| Iran National Cancer Registry Report 2004-2005 | 03/2004 to 02/2005  | Country       | Iran (Islamic Republic of) | Disease registry |                              |          |             |
| Iran National Cancer Registry Report 2005-2006 | 03/2005 to 02/2006  | Country       | Iran (Islamic Republic of) | Disease registry |                              |          |             |
| Iran National Cancer Registry Report 2006-2007 | 03/2006 to 02/2007  | Country       | Iran (Islamic Republic of) | Disease registry |                              |          |             |
| Iran National Cancer Registry Report 2009-2010 | 03/2009 to 03/2010  | Country       | Iran (Islamic Republic of) | Disease registry |                              |          |             |

| Title                                  | Time period covered | Coverage type | Geography | Data type        | Secondary data type | Provider                    | Dataset URL                                                                                                                     |
|----------------------------------------|---------------------|---------------|-----------|------------------|---------------------|-----------------------------|---------------------------------------------------------------------------------------------------------------------------------|
| Iraq Cancer Registry 2011              | 01/2011 to 12/2011  | Country       | Iraq      | Disease registry |                     |                             |                                                                                                                                 |
| Jordan Cancer Incidence Report 2001    | 01/2001 to 12/2001  | Country       | Jordan    | Disease registry |                     | Ministry of Health (Jordan) | <a href="http://www.moh.gov.jo/EN/Pages/Periodic-Newsletters.aspx">http://www.moh.gov.jo/EN/Pages/Periodic-Newsletters.aspx</a> |
| Jordan Cancer Incidence Report 2002    | 01/2002 to 12/2002  | Country       | Jordan    | Disease registry |                     | Ministry of Health (Jordan) | <a href="http://www.moh.gov.jo/EN/Pages/Periodic-Newsletters.aspx">http://www.moh.gov.jo/EN/Pages/Periodic-Newsletters.aspx</a> |
| Jordan Cancer Incidence Report 2003    | 01/2003 to 12/2003  | Country       | Jordan    | Disease registry |                     | Ministry of Health (Jordan) | <a href="http://www.moh.gov.jo/EN/Pages/Periodic-Newsletters.aspx">http://www.moh.gov.jo/EN/Pages/Periodic-Newsletters.aspx</a> |
| Jordan Cancer Incidence Report 2004    | 01/2004 to 12/2004  | Country       | Jordan    | Disease registry |                     | Ministry of Health (Jordan) | <a href="http://www.moh.gov.jo/EN/Pages/Periodic-Newsletters.aspx">http://www.moh.gov.jo/EN/Pages/Periodic-Newsletters.aspx</a> |
| Jordan Cancer Incidence Report 2005    | 01/2005 to 12/2005  | Country       | Jordan    | Disease registry |                     | Ministry of Health (Jordan) | <a href="http://www.moh.gov.jo/EN/Pages/Periodic-Newsletters.aspx">http://www.moh.gov.jo/EN/Pages/Periodic-Newsletters.aspx</a> |
| Jordan Cancer Incidence Report 2006    | 01/2005 to 12/2006  | Country       | Jordan    | Disease registry |                     | Ministry of Health (Jordan) | <a href="http://www.moh.gov.jo/EN/Pages/Periodic-Newsletters.aspx">http://www.moh.gov.jo/EN/Pages/Periodic-Newsletters.aspx</a> |
| Jordan Cancer Incidence Report 2007    | 01/2006 to 12/2007  | Country       | Jordan    | Disease registry |                     | Ministry of Health (Jordan) | <a href="http://www.moh.gov.jo/EN/Pages/Periodic-Newsletters.aspx">http://www.moh.gov.jo/EN/Pages/Periodic-Newsletters.aspx</a> |
| Jordan Cancer Incidence Report 2008    | 01/2007 to 12/2008  | Country       | Jordan    | Disease registry |                     | Ministry of Health (Jordan) | <a href="http://www.moh.gov.jo/EN/Pages/Periodic-Newsletters.aspx">http://www.moh.gov.jo/EN/Pages/Periodic-Newsletters.aspx</a> |
| Jordan Cancer Incidence Report 2009    | 01/2008 to 12/2009  | Country       | Jordan    | Disease registry |                     | Ministry of Health (Jordan) | <a href="http://www.moh.gov.jo/EN/Pages/Periodic-Newsletters.aspx">http://www.moh.gov.jo/EN/Pages/Periodic-Newsletters.aspx</a> |
| Jordan Cancer Incidence Report 2011    | 01/2011 to 12/2011  | Country       | Jordan    | Disease registry |                     | Ministry of Health (Jordan) | <a href="http://www.moh.gov.jo/Pages/viewpage.aspx?pageID=248">http://www.moh.gov.jo/Pages/viewpage.aspx?pageID=248</a>         |
| Jordan Cancer Incidence Report 2012    | 01/2012 to 12/2012  | Country       | Jordan    | Disease registry |                     | Ministry of Health (Jordan) | <a href="http://www.moh.gov.jo/Pages/viewpage.aspx?pageID=248">http://www.moh.gov.jo/Pages/viewpage.aspx?pageID=248</a>         |
| Kuwait Cancer Registry 1979-1982 - CI5 | 01/1979 to 12/1982  |               | Kuwait    | Disease registry |                     |                             |                                                                                                                                 |

| Title                                                                 | Time period covered | Coverage type | Geography                 | Data type        | Secondary data type                                       | Provider                                                  | Dataset URL                                                                                                                                                                                               |
|-----------------------------------------------------------------------|---------------------|---------------|---------------------------|------------------|-----------------------------------------------------------|-----------------------------------------------------------|-----------------------------------------------------------------------------------------------------------------------------------------------------------------------------------------------------------|
| Kuwait Cancer Registry 1983-1987 - CI5                                | 01/1983 to 12/1987  |               | Kuwait                    | Disease registry |                                                           |                                                           |                                                                                                                                                                                                           |
| Kuwait Cancer Registry 2003-2007 - CI5                                | 01/2003 to 12/2007  |               | Kuwait                    | Disease registry |                                                           |                                                           |                                                                                                                                                                                                           |
| Lebanon National Cancer Registry Tables 2005                          | 01/2005 to 12/2005  | Country       | Lebanon                   | Disease registry |                                                           | Ministry of Public Health (Lebanon)                       | <a href="http://www.moph.gov.lb/Prevention/Surveillance/Pages/Cancer.aspx">http://www.moph.gov.lb/Prevention/Surveillance/Pages/Cancer.aspx</a>                                                           |
| Lebanon National Cancer Registry Tables 2006                          | 01/2006 to 12/2006  | Country       | Lebanon                   | Disease registry |                                                           | Ministry of Public Health (Lebanon)                       | <a href="http://www.moph.gov.lb/Prevention/Surveillance/Pages/Cancer.aspx">http://www.moph.gov.lb/Prevention/Surveillance/Pages/Cancer.aspx</a>                                                           |
| Lebanon National Cancer Registry Tables 2007                          | 01/2007 to 12/2007  | Country       | Lebanon                   | Disease registry |                                                           | Ministry of Public Health (Lebanon)                       | <a href="http://www.moph.gov.lb/Prevention/Surveillance/Pages/Cancer.aspx">http://www.moph.gov.lb/Prevention/Surveillance/Pages/Cancer.aspx</a>                                                           |
| Lebanon Statistical Bulletin 2013                                     | 01/2007 to 12/2013  | Country       | Lebanon                   | Report           | Epi surveillance, Financial, Subnationally representative | Ministry of Public Health (Lebanon)                       | <a href="https://www.moph.gov.lb/ar/publications">https://www.moph.gov.lb/ar/publications</a>                                                                                                             |
| Libya - Benghazi Cancer Registry 2003-2005 - CI5                      | 01/2003 to 12/2005  |               | Libya, Benghazi           | Disease registry |                                                           |                                                           |                                                                                                                                                                                                           |
| Morocco - Cancer Registry of Greater Casablanca 2004                  | 01/2004 to 12/2004  | Subnational   | Morocco, Grand Casablanca | Disease registry | Subnationally representative, Urban-rural representative  | Lalla Salma Association to Fight Against Cancer (Morocco) | <a href="http://www.contrelecancer.ma/en/">http://www.contrelecancer.ma/en/</a>                                                                                                                           |
| Morocco - Cancer Registry of Greater Casablanca Region 2005 2006 2007 | 01/2005 to 12/2007  | Subnational   | Morocco, Grand Casablanca | Disease registry | Subnationally representative                              | Lalla Salma Association to Fight Against Cancer (Morocco) | <a href="http://www.contrelecancer.ma/en/documents/registre-des-cancers-de-la-region-du-grand-casab-2/">http://www.contrelecancer.ma/en/documents/registre-des-cancers-de-la-region-du-grand-casab-2/</a> |

| Title                                | Time period covered | Coverage type | Geography | Data type        | Secondary data type | Provider                  | Dataset URL                                                                                                                       |
|--------------------------------------|---------------------|---------------|-----------|------------------|---------------------|---------------------------|-----------------------------------------------------------------------------------------------------------------------------------|
| Oman - Cancer Incidence in Oman 2001 | 01/2001 to 12/2001  | Country       | Oman      | Disease registry |                     | Ministry of Health (Oman) | <a href="http://www.moh.gov.om/en/nv_menu.php?o=reports/report.htm">http://www.moh.gov.om/en/nv_menu.php?o=reports/report.htm</a> |
| Oman - Cancer Incidence in Oman 2002 | 01/2002 to 12/2002  | Country       | Oman      | Disease registry |                     | Ministry of Health (Oman) | <a href="http://www.moh.gov.om/en/nv_menu.php?o=reports/report.htm">http://www.moh.gov.om/en/nv_menu.php?o=reports/report.htm</a> |
| Oman - Cancer Incidence in Oman 2003 | 01/2003 to 12/2003  | Country       | Oman      | Disease registry |                     | Ministry of Health (Oman) | <a href="http://www.moh.gov.om/en/nv_menu.php?o=reports/report.htm">http://www.moh.gov.om/en/nv_menu.php?o=reports/report.htm</a> |
| Oman - Cancer Incidence in Oman 2004 | 01/2004 to 12/2004  | Country       | Oman      | Disease registry |                     | Ministry of Health (Oman) | <a href="http://www.moh.gov.om/en/nv_menu.php?o=reports/report.htm">http://www.moh.gov.om/en/nv_menu.php?o=reports/report.htm</a> |
| Oman - Cancer Incidence in Oman 2005 | 01/1996 to 12/2005  | Country       | Oman      | Disease registry |                     | Ministry of Health (Oman) | <a href="http://www.moh.gov.om/en/nv_menu.php?o=reports/report.htm">http://www.moh.gov.om/en/nv_menu.php?o=reports/report.htm</a> |
| Oman - Cancer Incidence in Oman 2006 | 01/1996 to 12/2006  | Country       | Oman      | Disease registry |                     | Ministry of Health (Oman) | <a href="http://www.moh.gov.om/en/nv_menu.php?o=reports/report.htm">http://www.moh.gov.om/en/nv_menu.php?o=reports/report.htm</a> |
| Oman - Cancer Incidence in Oman 2007 | 01/1997 to 12/2007  | Country       | Oman      | Disease registry |                     | Ministry of Health (Oman) | <a href="http://www.moh.gov.om/en/nv_menu.php?o=reports/report.htm">http://www.moh.gov.om/en/nv_menu.php?o=reports/report.htm</a> |
| Oman - Cancer Incidence in Oman 2008 | 01/2008 to 12/2008  | Country       | Oman      | Disease registry |                     | Ministry of Health (Oman) | <a href="http://www.moh.gov.om/en/nv_menu.php?o=reports/report.htm">http://www.moh.gov.om/en/nv_menu.php?o=reports/report.htm</a> |
| Oman - Cancer Incidence in Oman 2011 | 01/2011 to 12/2011  | Country       | Oman      | Disease registry |                     | Ministry of Health (Oman) | <a href="http://www.moh.gov.om/en/nv_menu.php?o=reports/report.htm">http://www.moh.gov.om/en/nv_menu.php?o=reports/report.htm</a> |

| Title                                          | Time period covered | Coverage type | Geography | Data type        | Secondary data type                            | Provider                       | Dataset URL                                                                                                                         |
|------------------------------------------------|---------------------|---------------|-----------|------------------|------------------------------------------------|--------------------------------|-------------------------------------------------------------------------------------------------------------------------------------|
| Oman - Cancer Incidence in Oman 2012           | 01/2012 to 12/2012  | Country       | Oman      | Disease registry |                                                | Ministry of Health (Oman)      | <a href="https://www.moh.gov.om/en/web/statistics/annual-reports">https://www.moh.gov.om/en/web/statistics/annual-reports</a>       |
| Oman - Cancer Incidence in Oman Report of 2009 | 01/1997 to 12/2009  | Country       | Oman      | Disease registry |                                                | Ministry of Health (Oman)      | <a href="http://www.moh.gov.om/en/nv_menu.php?o=reports/report.htm">http://www.moh.gov.om/en/nv_menu.php?o=reports/report.htm</a>   |
| Oman - Cancer Incidence in Oman Report of 2010 | 01/1998 to 12/2010  | Country       | Oman      | Disease registry |                                                | Ministry of Health (Oman)      | <a href="http://www.moh.gov.om/en/nv_menu.php?o=reports/report.htm">http://www.moh.gov.om/en/nv_menu.php?o=reports/report.htm</a>   |
| Oman Cancer Registry 1993-1997 - CI5           | 01/1993 to 12/1997  |               | Oman      | Disease registry |                                                |                                |                                                                                                                                     |
| Oman Cancer Registry 1998-2001 - CI5           | 01/1998 to 12/2001  |               | Oman      | Disease registry |                                                |                                |                                                                                                                                     |
| Palestine Health Status Annual Report 1999     | 01/1996 to 12/1999  | Country       | Palestine | Report           |                                                | Ministry of Health (Palestine) | <a href="http://www.moh.ps/">http://www.moh.ps/</a>                                                                                 |
| Palestine Health Status Annual Report 2000     | 01/2000 to 12/2000  | Country       | Palestine | Report           |                                                | Ministry of Health (Palestine) | <a href="http://www.moh.ps/">http://www.moh.ps/</a>                                                                                 |
| Palestine Health Status Annual Report 2001     | 01/1997 to 12/2001  | Country       | Palestine | Report           | Epi surveillance, Subnationally representative | Ministry of Health (Palestine) | <a href="http://www.moh.ps/">http://www.moh.ps/</a>                                                                                 |
| Palestine Health Status Annual Report 2010     | 01/2010 to 12/2010  | Country       | Palestine | Report           |                                                | Ministry of Health (Palestine) | <a href="https://www.site.moh.ps/index/Books/BookType/2/Language/ar">https://www.site.moh.ps/index/Books/BookType/2/Language/ar</a> |
| Palestine Health Status Annual Report 2011     | 01/2002 to 12/2011  | Country       | Palestine | Report           | Epi surveillance                               | Ministry of Health (Palestine) | <a href="https://www.site.moh.ps/index/Books/BookType/2/Language/ar">https://www.site.moh.ps/index/Books/BookType/2/Language/ar</a> |



| Title                                                     | Time period covered | Coverage type | Geography | Data type             | Secondary data type                            | Provider                       | Dataset URL                                                                                                                         |
|-----------------------------------------------------------|---------------------|---------------|-----------|-----------------------|------------------------------------------------|--------------------------------|-------------------------------------------------------------------------------------------------------------------------------------|
| Palestine Health Status Annual Report 2012                | 01/2002 to 12/2012  | Country       | Palestine | Report                | Epi surveillance, Subnationally representative | Ministry of Health (Palestine) | <a href="https://www.site.moh.ps/index/Books/BookType/2/Language/ar">https://www.site.moh.ps/index/Books/BookType/2/Language/ar</a> |
| Palestine Health Status Annual Report 2013                | 01/2007 to 12/2013  | Country       | Palestine | Report                | Epi surveillance, Subnationally representative | Ministry of Health (Palestine) | <a href="https://www.site.moh.ps/index/Books/BookType/2/Language/ar">https://www.site.moh.ps/index/Books/BookType/2/Language/ar</a> |
| Palestine Health Status Annual Report 2014                | 01/2008 to 12/2014  | Country       | Palestine | Report                | Epi surveillance, Subnationally representative | Ministry of Health (Palestine) | <a href="https://www.site.moh.ps/index/Books/BookType/2/Language/ar">https://www.site.moh.ps/index/Books/BookType/2/Language/ar</a> |
| Palestine Health Status Annual Report 2015                | 01/2009 to 12/2015  | Country       | Palestine | Report                | Epi surveillance, Subnationally representative | Ministry of Health (Palestine) | <a href="https://www.site.moh.ps/index/Books/BookType/2/Language/ar">https://www.site.moh.ps/index/Books/BookType/2/Language/ar</a> |
| Palestine Health Status Annual Report 2016                | 01/2009 to 12/2016  | Country       | Palestine | Report                | Epi surveillance, Subnationally representative | Ministry of Health (Palestine) | <a href="https://www.site.moh.ps/index/Books/BookType/2/Language/ar">https://www.site.moh.ps/index/Books/BookType/2/Language/ar</a> |
| Palestine Health Status Annual Report 2017                | 01/1988 to 12/2017  | Country       | Palestine | Report                | Epi surveillance, Subnationally representative | Ministry of Health (Palestine) | <a href="https://www.site.moh.ps/index/Books/BookType/2/Language/ar">https://www.site.moh.ps/index/Books/BookType/2/Language/ar</a> |
| The Epidemiology and Trend of Cancer in Jordan, 2000-2013 | 01/2000 to 12/2013  |               | Jordan    | Scientific literature |                                                |                                |                                                                                                                                     |

Supplementary Table 2

| Location                     |                            | Incidence               |                           |                          | Prevalence                |                             |                          | Deaths                 |                           |                          |
|------------------------------|----------------------------|-------------------------|---------------------------|--------------------------|---------------------------|-----------------------------|--------------------------|------------------------|---------------------------|--------------------------|
|                              |                            | 1990 (95% UI)           | 2019 (95% UI)             | Percent changes (95% UI) | 1990 (95% UI)             | 2019 (95% UI)               | Percent changes (95% UI) | 1990 (95% UI)          | 2019 (95% UI)             | Percent changes (95% UI) |
| North Africa and Middle East |                            | 9552.1 (7684.4-11523.6) | 47473.6 (36988.5-55846.8) | 397 (322.1-501.4)        | 55690.7 (45332.9-65113.6) | 348924 (271316.9-407425.5)  | 526.5 (433.9-647.4)      | 6647.8 (5380.2-8230.6) | 19088.9 (15241.1-22498.5) | 187.1 (147.6-246.7)      |
| Countries                    | Afghanistan                | 359.5 (268.4-490.2)     | 585.3 (438.5-744.4)       | 62.8 (22.5-112)          | 1312.9 (1027.3-1692.8)    | 2648.8 (1959.5-3351.8)      | 101.7 (48.2-168.5)       | 351.4 (256.2-488.3)    | 505.2 (377.5-661.8)       | 43.8 (9.5-83.3)          |
|                              | Algeria                    | 680.9 (497.3-888.2)     | 2844.7 (2104.5-3955.3)    | 317.8 (200.2-464.6)      | 4108.7 (3079.2-5297.1)    | 20966.6 (15497.5-28937.4)   | 410.3 (258.1-596.4)      | 468 (349.2-608.1)      | 1279.9 (960.1-1739.3)     | 173.5 (102.1-258.4)      |
|                              | Bahrain                    | 15.4 (11.6-19.3)        | 165.8 (116.4-236.1)       | 974.8 (607.6-1524.6)     | 101.9 (78.6-128)          | 1411.1 (986.5-2006.1)       | 1285.5 (793-1965.7)      | 8.6 (6.4-10.6)         | 36.3 (27.2-47.7)          | 323.5 (201.6-490.7)      |
|                              | Egypt                      | 856.3 (726.5-1062.7)    | 3800.4 (2623.9-5430.7)    | 343.8 (215.7-542.6)      | 4650.1 (3887.8-5503.7)    | 25772.3 (17595.5-37084.1)   | 454.2 (291.1-687.5)      | 658.8 (559.9-853.6)    | 1807.7 (1293-2508.6)      | 174.4 (99.6-283.8)       |
|                              | Iran (Islamic Republic of) | 1778.7 (1352.6-2186.8)  | 10423.6 (7299.2-12189.4)  | 486 (365.5-653.2)        | 12637.8 (9501.6-15417.1)  | 79026.6 (55832.2-93309.9)   | 525.3 (393.1-701.4)      | 917.4 (725.3-1150.3)   | 3916.3 (2912.3-4438.7)    | 326.9 (249.1-435.7)      |
|                              | Iraq                       | 357.3 (249.2-496.6)     | 1917.4 (1425.7-2465.9)    | 436.6 (277.5-676.9)      | 1919.2 (1406.7-2561.9)    | 14028.3 (10357.6-17976.3)   | 630.9 (417.6-949.3)      | 267.5 (189.9-381.4)    | 861.4 (651.3-1158)        | 222 (136.3-343.6)        |
|                              | Jordan                     | 73.7 (57.2-95.4)        | 738.9 (520.7-996.6)       | 902.4 (622.2-1283.5)     | 471.8 (367.5-610.1)       | 5740.5 (4105-7754.8)        | 1116.7 (779.3-1610.7)    | 46.4 (36.2-58.7)       | 256.5 (179.9-334.4)       | 452.4 (314.7-639.2)      |
|                              | Kuwait                     | 53.2 (40.4-67.7)        | 428.9 (313.1-596.8)       | 705.8 (505.3-951.1)      | 445.3 (343.8-558.7)       | 3572.2 (2623.2-4969.4)      | 702.1 (498.5-953.8)      | 16.2 (12.3-20.7)       | 105.8 (78-138.6)          | 551.7 (422.6-703.6)      |
|                              | Lebanon                    | 294.3 (225.5-373.9)     | 1722.5 (1112.2-2422.6)    | 485.3 (306.9-727.7)      | 1764 (1371.5-2228.2)      | 12734.4 (8470.7-17699.8)    | 621.9 (396.3-926.8)      | 182.5 (135.8-229.7)    | 587.9 (363.6-858)         | 222.2 (124.2-353.7)      |
|                              | Libya                      | 111 (70.3-150.7)        | 453 (328-605.6)           | 308.3 (174.6-548.2)      | 694.4 (465.4-914.6)       | 3205.5 (2318.3-4283.7)      | 361.6 (211-617.5)        | 72.9 (47.1-99.5)       | 207.9 (156.1-271.4)       | 185.1 (101.9-338.3)      |
|                              | Morocco                    | 484 (361-608.1)         | 2134 (1517.4-2792.8)      | 340.9 (214.9-478.9)      | 2522.9 (1946.5-3128.2)    | 14093.5 (10035.9-18512.3)   | 458.6 (301.1-635.8)      | 388.6 (283.7-505.8)    | 1184.8 (871.1-1563.8)     | 204.9 (127.3-292.8)      |
|                              | Oman                       | 41.8 (27.3-58.7)        | 246.2 (182.1-342.5)       | 488.4 (311.3-731.6)      | 303.6 (207.5-419.8)       | 2085 (1514.9-2894.6)        | 586.8 (382.7-870.4)      | 20.6 (13.6-29)         | 54.1 (44.2-70)            | 162.6 (87.9-301.5)       |
|                              | Palestine                  | 81.6 (56-113.4)         | 294.4 (198.6-377.9)       | 260.7 (150.6-447.2)      | 455.9 (323.7-627.9)       | 2171.7 (1527.6-2764.2)      | 376.4 (234.3-609.2)      | 57.7 (39.3-79.9)       | 122.5 (80.2-155.3)        | 112.3 (50.4-227.1)       |
|                              | Qatar                      | 8.4 (6.1-12.1)          | 224.1 (140.7-362.9)       | 2575.3 (1586.1-4001)     | 65.7 (48.9-94.5)          | 1989.5 (1258.6-3207.9)      | 2926 (1834.9-4448.2)     | 3.5 (2.7-4.8)          | 31.7 (21.9-45.3)          | 797.1 (522.9-1214.3)     |
|                              | Saudi Arabia               | 341.4 (203.9-532.3)     | 2303.2 (1655.5-3462.7)    | 574.7 (328.9-1303.6)     | 2239.1 (1468.1-3312.2)    | 19565.3 (14181.7-29201)     | 773.8 (464.9-1574.1)     | 225.9 (135-357)        | 480.4 (363.8-719.4)       | 112.7 (45.1-336.8)       |
|                              | Sudan                      | 389 (274.2-535.7)       | 1291.3 (892.6-1748)       | 232 (145.2-361.9)        | 1777.4 (1328.3-2379.8)    | 7514 (5109.8-10230.2)       | 322.8 (210.6-482.9)      | 343.6 (241.7-479)      | 866.8 (610.2-1168.1)      | 152.2 (94.8-242.5)       |
|                              | Syrian Arab Republic       | 284.7 (194.8-433.5)     | 1168.2 (799.9-1858.3)     | 310.3 (167-553.6)        | 1733.3 (1290.1-2397.7)    | 8738.6 (6093.4-13697)       | 404.2 (228-683.6)        | 194.8 (125.2-320.5)    | 451.6 (307.6-732.8)       | 131.8 (58.4-269.1)       |
|                              | Tunisia                    | 266.8 (196-352.7)       | 1266.3 (878.1-1796.9)     | 374.7 (213.2-622.5)      | 1714.1 (1291.9-2221.2)    | 9575.2 (6765.7-13545.7)     | 458.6 (278.2-745.2)      | 168.5 (123.9-221.4)    | 462.7 (330.2-648.3)       | 174.7 (87.5-312.7)       |
|                              | Turkey                     | 2865.7 (2004-3660.6)    | 14001.8 (9792.1-18451.5)  | 388.6 (248.7-572.7)      | 15603.4 (11104.3-20078.7) | 103771.1 (72808.4-138053.8) | 565.1 (375.8-830.9)      | 2101.7 (1491.4-2662.5) | 5185.3 (3701.8-6591.5)    | 146.7 (82.3-228.4)       |
| United Arab Emirates         | 32.4 (19.8-54.9)           | 624.4 (323.5-1195.9)    | 1824.7 (1093.7-2813.1)    | 249.6 (159.9-407.6)      | 5415.5 (2897.2-10121.5)   | 2069.8 (1263.3-3193.1)      | 14.6 (9-24.6)            | 126.7 (69.6-241)       | 768.6 (478.4-1160.8)      |                          |
| Yemen                        | 169.5 (111.4-243)          | 791.1 (567.6-1069.7)    | 366.6 (240.9-591.6)       | 882 (623-1237.1)         | 4543.7 (3280.3-6230.7)    | 415.2 (272.8-666.1)         | 134 (85.9-194.3)         | 538 (394.3-713.8)      | 301.4 (199-476.3)         |                          |

Supplementary Table 3

| Location                            |                            | New cases |       | Expected new cases in 2019 |                           | 1990 - 2019 new cases change cause |                        |                         | 1990 - 2019 new cases overall change |
|-------------------------------------|----------------------------|-----------|-------|----------------------------|---------------------------|------------------------------------|------------------------|-------------------------|--------------------------------------|
|                                     |                            | 1990      | 2019  | Population growth          | Population growth + Aging | % Population growth                | % Age structure change | % Incidence rate change |                                      |
| <b>North Africa and Middle East</b> |                            | 9552      | 47474 | 17090                      | 25100                     | 78.9%                              | 83.9%                  | 234.2%                  | 397%                                 |
| <b>Countries</b>                    | Afghanistan                | 360       | 585   | 1250                       | 486                       | 247.7%                             | -212.6%                | 27.7%                   | 62.8%                                |
|                                     | Algeria                    | 681       | 2845  | 1129                       | 2059                      | 65.8%                              | 136.6%                 | 115.4%                  | 317.8%                               |
|                                     | Bahrain                    | 15        | 166   | 47                         | 96                        | 204.8%                             | 320.7%                 | 449.2%                  | 974.8%                               |
|                                     | Egypt                      | 856       | 3800  | 1543                       | 2090                      | 80.2%                              | 63.9%                  | 199.7%                  | 343.8%                               |
|                                     | Iran (Islamic Republic of) | 1779      | 10424 | 2545                       | 5332                      | 43.1%                              | 156.7%                 | 286.3%                  | 486%                                 |
|                                     | Iraq                       | 357       | 1917  | 859                        | 987                       | 140.3%                             | 36%                    | 260.4%                  | 436.6%                               |
|                                     | Jordan                     | 74        | 739   | 232                        | 390                       | 214.6%                             | 215.1%                 | 472.7%                  | 902.4%                               |
|                                     | Kuwait                     | 53        | 429   | 125                        | 220                       | 135.2%                             | 178.9%                 | 391.7%                  | 705.8%                               |
|                                     | Lebanon                    | 294       | 1722  | 453                        | 705                       | 54%                                | 85.7%                  | 345.6%                  | 485.3%                               |
|                                     | Libya                      | 111       | 453   | 174                        | 289                       | 57%                                | 103.6%                 | 147.6%                  | 308.3%                               |
|                                     | Morocco                    | 484       | 2134  | 694                        | 1119                      | 43.4%                              | 87.8%                  | 209.7%                  | 340.9%                               |
|                                     | Oman                       | 42        | 246   | 109                        | 117                       | 160.6%                             | 18.5%                  | 309.3%                  | 488.4%                               |
|                                     | Palestine                  | 82        | 294   | 198                        | 207                       | 142.1%                             | 11.8%                  | 106.7%                  | 260.7%                               |
|                                     | Qatar                      | 8         | 224   | 60                         | 89                        | 618.7%                             | 337.8%                 | 1618.8%                 | 2575.3%                              |
|                                     | Saudi Arabia               | 341       | 2303  | 794                        | 963                       | 132.5%                             | 49.5%                  | 392.7%                  | 574.7%                               |
|                                     | Sudan                      | 389       | 1291  | 789                        | 792                       | 102.8%                             | 0.8%                   | 128.4%                  | 232%                                 |
|                                     | Syrian Arab Republic       | 285       | 1168  | 305                        | 667                       | 7%                                 | 127.2%                 | 176.1%                  | 310.3%                               |
|                                     | Tunisia                    | 267       | 1266  | 359                        | 653                       | 34.7%                              | 110.2%                 | 229.8%                  | 374.7%                               |
|                                     | Turkey                     | 2866      | 14002 | 3886                       | 7542                      | 35.6%                              | 127.6%                 | 225.4%                  | 388.6%                               |
| United Arab Emirates                | 32                         | 624       | 180   | 322                        | 454.1%                    | 439.7%                             | 930.9%                 | 1824.7%                 |                                      |
| Yemen                               | 170                        | 791       | 386   | 527                        | 127.7%                    | 83.2%                              | 155.7%                 | 366.6%                  |                                      |

Supplementary Table 4

| Location                            |                            | YLLs <sup>1</sup>              |                                 |                          | YLDs <sup>2</sup>         |                            |                          | DALYs <sup>3</sup>              |                               |                          |
|-------------------------------------|----------------------------|--------------------------------|---------------------------------|--------------------------|---------------------------|----------------------------|--------------------------|---------------------------------|-------------------------------|--------------------------|
|                                     |                            | 1990 (95% UI)                  | 2019 (95% UI)                   | Percent changes (95% UI) | 1990 (95% UI)             | 2019 (95% UI)              | Percent changes (95% UI) | 1990 (95% UI)                   | 2019 (95% UI)                 | Percent changes (95% UI) |
| <b>North Africa and Middle East</b> |                            | 120603.2<br>(98236.2-146994.6) | 317372.1<br>(249856.6-372106.1) | 163.2<br>(126.9-216.6)   | 5158.3<br>(3592.8-6999.2) | 28390.3<br>(19167-38271.9) | 450.4<br>(364.8-572)     | 125761.5<br>(102033.9-153135.7) | 345762.4<br>(270783-404981.7) | 174.9<br>(136.2-229.8)   |
| Countries                           | Afghanistan                | 6441 (4826.3-8748.2)           | 9123.8 (6883.5-11558.3)         | 41.7 (7.4-81.9)          | 156.9 (101.1-230.5)       | 268 (172.4-382.2)          | 70.8 (23.1-138.8)        | 6597.9 (4945.1-8969.5)          | 9391.9 (7112.3-11931.7)       | 42.3 (8.2-82.8)          |
|                                     | Algeria                    | 8380.4 (6111.5-10902.9)        | 20553.4 (15170.6-27904.7)       | 145.3 (78.1-228.9)       | 366.1 (232.4-528.4)       | 1650.5 (1075.2-2486.4)     | 350.8 (209.2-530.2)      | 8746.5 (6408.5-11387.9)         | 22203.9 (16364.3-30443.9)     | 153.9 (83.5-240.3)       |
|                                     | Bahrain                    | 169.3 (129-206.2)              | 730.6 (534.3-1001)              | 331.6 (194.8-527.9)      | 9.2 (6.2-13.2)            | 103.2 (62.1-161.3)         | 1027.8 (615.1-1582.2)    | 178.4 (136.5-217.5)             | 833.8 (607.3-1152.1)          | 367.3 (220.1-574.2)      |
|                                     | Egypt                      | 12299.8 (10428.5-15288.3)      | 33227.4 (23558.1-46517.7)       | 170.1 (94.5-284.7)       | 470.4 (327.5-641.8)       | 2367.3 (1432.8-3716)       | 403.2 (232.3-627.6)      | 12770.2 (10828.2-15910)         | 35594.7 (25029.7-49721.9)     | 178.7 (100.7-295.4)      |
|                                     | Iran (Islamic Republic of) | 18240.4 (14374.6-22355)        | 61523.5 (45527.8-69323.1)       | 237.3 (179.3-316.6)      | 1050 (696.1-1503)         | 6204.1 (4043.2-8647.2)     | 490.9 (367.9-660.1)      | 19290.3 (15181.8-23620.3)       | 67727.5 (50159.7-76614.3)     | 251.1 (189.6-333.1)      |
|                                     | Iraq                       | 4550.5 (3206.5-6482)           | 15057.8 (11256.5-19536.3)       | 230.9 (138.5-369.6)      | 186.3 (117.6-275.3)       | 1099.4 (687.3-1613.4)      | 490 (295.2-787.1)        | 4736.8 (3336.5-6744.6)          | 16157.2 (12158.9-20976.4)     | 241.1 (144.5-383.6)      |
|                                     | Jordan                     | 839.5 (648.5-1070.6)           | 4402.9 (3079.9-5760.7)          | 424.4 (287.6-596.5)      | 41.3 (27.4-58.6)          | 448.9 (270-665.1)          | 988.1 (669.6-1447.7)     | 880.8 (683.6-1123.6)            | 4851.8 (3416-6323.5)          | 450.8 (305.9-637.1)      |
|                                     | Kuwait                     | 329.9 (248.9-419.6)            | 1663.2 (1231.5-2202.3)          | 404.2 (294.4-524.6)      | 33.9 (22-48.7)            | 263.5 (166.8-396.8)        | 677.3 (458.4-959.9)      | 363.8 (275.4-456.5)             | 1926.8 (1415.3-2598.4)        | 429.7 (314.4-556.9)      |
|                                     | Lebanon                    | 3114.9 (2367.3-3862.5)         | 8756.1 (5506.4-12457.6)         | 181.1 (94.5-292)         | 165.1 (111.5-240.5)       | 1049.3 (626.9-1605.1)      | 535.6 (331.1-805.6)      | 3280 (2503.2-4101.9)            | 9805.4 (6234.9-13905)         | 198.9 (107.3-315.9)      |
|                                     | Libya                      | 1231.7 (794-1661.5)            | 3460 (2554.1-4519.1)            | 180.9 (97.2-331.7)       | 60.6 (35.5-90.3)          | 268.4 (172.6-396.6)        | 342.9 (192.3-612.7)      | 1292.3 (834.5-1742.7)           | 3728.5 (2736.4-4884.2)        | 188.5 (102.1-343.7)      |
|                                     | Morocco                    | 6973.1 (5222.1-8765.3)         | 20244.9 (14661-26472.4)         | 190.3 (112.4-276.8)      | 243 (161.6-338.7)         | 1195.4 (742.2-1738.5)      | 391.9 (244-576.1)        | 7216.1 (5406.4-9071.8)          | 21440.3 (15509.8-27935.5)     | 197.1 (117.8-285.1)      |
|                                     | Oman                       | 424.6 (279.8-599.3)            | 1069.1 (850.2-1422.7)           | 151.8 (81.6-262.8)       | 26 (15.2-39.4)            | 160.4 (101.6-245.6)        | 516.1 (330.3-769.7)      | 450.6 (295.7-631.3)             | 1229.5 (967.4-1649.4)         | 172.8 (97.3-289.5)       |
|                                     | Palestine                  | 953.2 (652.6-1306.2)           | 2176.8 (1466.8-2752.3)          | 128.4 (60.7-247.8)       | 43.3 (26.5-68.3)          | 172.8 (108.4-247.1)        | 299.5 (176.7-519.5)      | 996.4 (679.2-1375.5)            | 2349.7 (1590.4-2972.7)        | 135.8 (65.6-258.7)       |
|                                     | Qatar                      | 78.7 (59-110)                  | 704.4 (468.8-1044.6)            | 794.8 (503.1-1219.5)     | 5.3 (3.4-8)               | 143.1 (79.3-248.8)         | 2596.6 (1570.5-4025.3)   | 84 (63-116.1)                   | 847.5 (555.3-1277.1)          | 908.6 (570.5-1406.3)     |
|                                     | Saudi Arabia               | 4144.5 (2512.3-6487.3)         | 9885 (7442-14908.6)             | 138.5 (59.3-394.8)       | 188.5 (103.4-300.6)       | 1466.5 (939.3-2306.7)      | 678 (390-1510.1)         | 4333 (2609.7-6789.5)            | 11351.5 (8493-16850.3)        | 162 (73.5-441.2)         |
|                                     | Sudan                      | 6251.7 (4420.5-8654.2)         | 14704.3 (10191.7-19926.2)       | 135.2 (77.6-222)         | 188.3 (118.6-285.9)       | 684 (417-1023.4)           | 263.2 (155.7-423.4)      | 6440 (4570.4-8889.6)            | 15388.3 (10624.7-20876.2)     | 138.9 (80.7-227.5)       |
|                                     | Syrian Arab Republic       | 3464.2 (2336.9-5354.7)         | 7991.3 (5446.6-12789.4)         | 130.7 (54.4-264.8)       | 157.2 (97.5-247.4)        | 717.8 (428.6-1187.7)       | 356.5 (189.9-642.1)      | 3621.4 (2443.3-5598.9)          | 8709 (5997.1-13816.2)         | 140.5 (62.3-276.8)       |
|                                     | Tunisia                    | 2926.5 (2165.1-3853)           | 7449 (5306.8-10553.2)           | 154.5 (71.1-278.9)       | 149.4 (95.4-215.4)        | 773 (478.2-1182.1)         | 417.5 (245.9-693.9)      | 3075.8 (2284.1-4036.1)          | 8222 (5835.2-11754.5)         | 167.3 (80.4-297.4)       |
|                                     | Turkey                     | 36637.7 (25971.3-46046.2)      | 80979.6 (57964.8-104215.8)      | 121 (64-194.9)           | 1504.4 (954.2-2234.5)     | 8488.4 (5292.5-12427.4)    | 464.2 (294.4-695.5)      | 38142.2 (26980.5-48165)         | 89468.1 (63878.9-116480.8)    | 134.6 (73.4-214.5)       |
| United Arab Emirates                | 357.3 (224.7-588.8)        | 3588.4 (1931.7-6690.5)         | 904.3 (553.1-1388.2)            | 20.4 (11.2-35.7)         | 412.4 (194.1-833.6)       | 1921 (1148-2963.3)         | 377.7 (237.6-621.3)      | 4000.9 (2152.7-7465.6)          | 959.2 (589.1-1458.1)          |                          |
| Yemen                               | 2713.4 (1770.9-3864)       | 9758.1 (7088.2-13097.5)        | 259.6 (162.7-424.8)             | 89.2 (52.1-137.6)        | 425 (263.6-639.9)         | 376.4 (232.2-621.3)        | 2802.6 (1830.6-3999.6)   | 10183.1 (7403.2-13688.7)        | 263.3 (166.2-428.6)           |                          |

<sup>1</sup>Years of Life Lost<sup>2</sup>Years Lived with Disability<sup>3</sup>Disability-Adjusted Life Years

Supplementary Table 5

| Location                            |                            | YLLs <sup>1</sup>        |                           |                          | YLDs <sup>2</sup>   |                        |                          | DALYs <sup>3</sup>     |                           |                          |
|-------------------------------------|----------------------------|--------------------------|---------------------------|--------------------------|---------------------|------------------------|--------------------------|------------------------|---------------------------|--------------------------|
|                                     |                            | 1990 (95% UI)            | 2019 (95% UI)             | Percent changes (95% UI) | 1990 (95% UI)       | 2019 (95% UI)          | Percent changes (95% UI) | 1990 (95% UI)          | 2019 (95% UI)             | Percent changes (95% UI) |
| <b>North Africa and Middle East</b> |                            | 10166.6 (4379.1-16031.6) | 22421.7 (10204.8-35816.3) | 120.5 (75.5-180.3)       | 457.2 (185.8-772.6) | 2198.8 (946.8-3714.7)  | 380.9 (273.7-514.3)      | 10623.8 (4591.1-16900) | 24620.5 (11060.4-39136.1) | 131.7 (84-196.6)         |
| <b>Countries</b>                    | Afghanistan                | 183 (71.3-329.6)         | 358.9 (141.7-628.7)       | 96.1 (34.8-179.9)        | 4.5 (1.7-8.7)       | 10.8 (4.1-19.8)        | 142.5 (63-273.8)         | 187.5 (73-336.5)       | 369.7 (146.4-648)         | 97.2 (35.6-181.2)        |
|                                     | Algeria                    | 700.3 (302.7-1160.8)     | 1484.7 (651.6-2507.2)     | 112 (47.2-208.9)         | 30.7 (12.5-54.2)    | 121.4 (51-217.6)       | 295.5 (162.5-479.3)      | 731 (315.5-1204.5)     | 1606.1 (705.3-2703.7)     | 119.7 (53-216)           |
|                                     | Bahrain                    | 12.2 (5.2-20.7)          | 43.1 (17.3-75.5)          | 251.8 (131-421.3)        | 0.7 (0.3-1.2)       | 6 (2.4-11.5)           | 808.8 (450.3-1292.2)     | 12.9 (5.5-21.7)        | 49 (19.5-86.4)            | 280.2 (148-468.2)        |
|                                     | Egypt                      | 935.7 (416.7-1445.9)     | 2826.1 (1257.5-4937.2)    | 202 (110.2-335.2)        | 36.9 (15.4-64.2)    | 209.3 (83.5-384.4)     | 467.3 (273.2-755.3)      | 972.6 (431.9-1503.9)   | 3035.4 (1381.1-5295.1)    | 212.1 (117-347.8)        |
|                                     | Iran (Islamic Republic of) | 1266.3 (516.8-2046.9)    | 3343.1 (1500.3-5499.9)    | 164 (100.4-253.6)        | 76.9 (32.1-137.1)   | 383.7 (158.2-664.1)    | 398.8 (268.1-570.1)      | 1343.3 (552.3-2170.8)  | 3726.8 (1665-6117.9)      | 177.4 (111.8-269.7)      |
|                                     | Iraq                       | 446.6 (176.9-741.3)      | 1234 (510.7-2059.5)       | 176.3 (91.5-307.2)       | 18.9 (7.4-33.1)     | 93.1 (37.8-165.7)      | 391.9 (222.2-667.9)      | 465.5 (183.4-770.5)    | 1327.1 (546.3-2211.7)     | 185.1 (98.4-319.8)       |
|                                     | Jordan                     | 94.6 (40-156.1)          | 400.6 (184.3-674.5)       | 323.3 (175.6-542.2)      | 4.8 (1.8-8.5)       | 43.5 (17.6-77.6)       | 803.5 (472.7-1311)       | 99.4 (41.8-164.6)      | 444.1 (202.4-741.7)       | 346.5 (188.9-579.8)      |
|                                     | Kuwait                     | 27.2 (11.3-45.1)         | 106.1 (47.8-184.4)        | 290.1 (184.6-432.5)      | 2.9 (1.2-5.2)       | 18.3 (7.7-34)          | 524.1 (337.5-809.3)      | 30.1 (12.7-49.8)       | 124.5 (53.3-214.2)        | 312.9 (199.3-463.2)      |
|                                     | Lebanon                    | 255.6 (113.8-422.9)      | 784.2 (330.4-1424.5)      | 206.9 (103.4-359.9)      | 14.3 (5.9-25.4)     | 100.9 (39.3-187)       | 606.7 (358.3-976.4)      | 269.8 (119.5-444.1)    | 885.1 (375.3-1610.7)      | 228 (118.2-385.4)        |
|                                     | Libya                      | 99.6 (38.2-169.6)        | 233.1 (100.6-380.4)       | 134.1 (56.2-273.5)       | 5.3 (1.9-9.3)       | 20.3 (8.2-36.6)        | 285 (141.7-556.2)        | 104.8 (40.7-178.3)     | 253.4 (108.2-416.6)       | 141.7 (61.2-288.4)       |
|                                     | Morocco                    | 450.5 (199.9-743.3)      | 979.7 (398.9-1633)        | 117.5 (46.7-199.2)       | 16.6 (6.9-29.3)     | 63.6 (23.8-113.4)      | 284.3 (150.4-463.7)      | 467 (205.3-770)        | 1043.3 (422.6-1751)       | 123.4 (50.7-208.2)       |
|                                     | Oman                       | 22.5 (8.7-38.5)          | 38.4 (16.3-65.5)          | 71.2 (18.5-155.4)        | 1.5 (0.6-2.6)       | 6.2 (2.4-11.5)         | 320.5 (172.6-530.2)      | 23.9 (9.2-41)          | 44.6 (19.4-77.2)          | 86.4 (29.2-177.1)        |
|                                     | Palestine                  | 82.3 (33.3-148.6)        | 181.2 (80.2-306.1)        | 120.1 (46.7-244.8)       | 3.9 (1.5-7.5)       | 15.4 (6.2-26.8)        | 289.6 (160.3-530.1)      | 86.3 (34.8-155.3)      | 196.6 (86.5-329.2)        | 127.9 (52.5-257.3)       |
|                                     | Qatar                      | 4.3 (1.8-7.8)            | 35.3 (13.6-64.5)          | 713.2 (423.1-1159.9)     | 0.3 (0.1-0.6)       | 7.3 (2.7-15.1)         | 2347 (1333.3-3964.7)     | 4.6 (1.9-8.4)          | 42.6 (16.7-79)            | 818.7 (483.8-1311.1)     |
|                                     | Saudi Arabia               | 158.3 (42.5-320.5)       | 457.4 (187.6-834.2)       | 188.9 (66-606.6)         | 7.7 (2-15.7)        | 75 (30.1-143.5)        | 874.4 (418.9-2252.2)     | 166 (44.5-336)         | 532.4 (220.1-977.6)       | 220.7 (82.3-683.1)       |
|                                     | Sudan                      | 390.8 (133.3-722.9)      | 850.3 (308.5-1605.1)      | 117.6 (48.6-221.9)       | 12.1 (4.1-23.2)     | 41.7 (14-81.6)         | 244.3 (119.7-428.9)      | 402.9 (136.8-744.3)    | 892 (323.8-1674.5)        | 121.4 (51.9-227.6)       |
|                                     | Syrian Arab Republic       | 341.6 (138.8-587.7)      | 637.9 (264.8-1145.1)      | 86.7 (17.6-207.1)        | 16.2 (6.7-28.8)     | 61.8 (24.8-117.3)      | 281.9 (128.2-536.5)      | 357.8 (144.9-619.4)    | 699.7 (289.7-1248.3)      | 95.6 (23.5-220.2)        |
|                                     | Tunisia                    | 284.2 (114.4-472.3)      | 650.7 (270.8-1138.8)      | 129 (45.5-262.8)         | 14.8 (5.8-26.2)     | 70.2 (27.3-129.4)      | 373.6 (195.5-647.3)      | 299 (119.3-491.2)      | 721 (301-1267.7)          | 141.1 (53.8-281.2)       |
|                                     | Turkey                     | 4161.6 (1764.1-6894.6)   | 6839.7 (2981-11450.6)     | 64.4 (13-136.7)          | 179.3 (70.9-314.8)  | 792.8 (326.8-1414.9)   | 342.2 (195.3-569.6)      | 4340.8 (1839.4-7203.4) | 7632.4 (3358.6-12727.4)   | 75.8 (20.7-153.6)        |
| United Arab Emirates                | 17.8 (7.1-34.4)            | 188 (68.8-401.8)         | 957.2 (546-1547.9)        | 1 (0.4-2.1)              | 22 (7.1-48.9)       | 2010.3 (1076.8-3239.2) | 18.8 (7.5-36.2)          | 210 (76.3-448)         | 1015.6 (585.4-1650.2)     |                          |
| Yemen                               | 224.8 (88.9-400.4)         | 726.4 (292.9-1229.9)     | 223.1 (127.9-386.1)       | 7.6 (2.9-14.3)           | 33.1 (12.9-59.7)    | 334.9 (190.6-577.5)    | 232.4 (92.2-414.9)       | 759.5 (305.2-1285.6)   | 226.8 (130.5-393.9)       |                          |

<sup>1</sup>Years of Life Lost<sup>2</sup>Years Lived with Disability<sup>3</sup>Disability-Adjusted Life Years

### Incidence

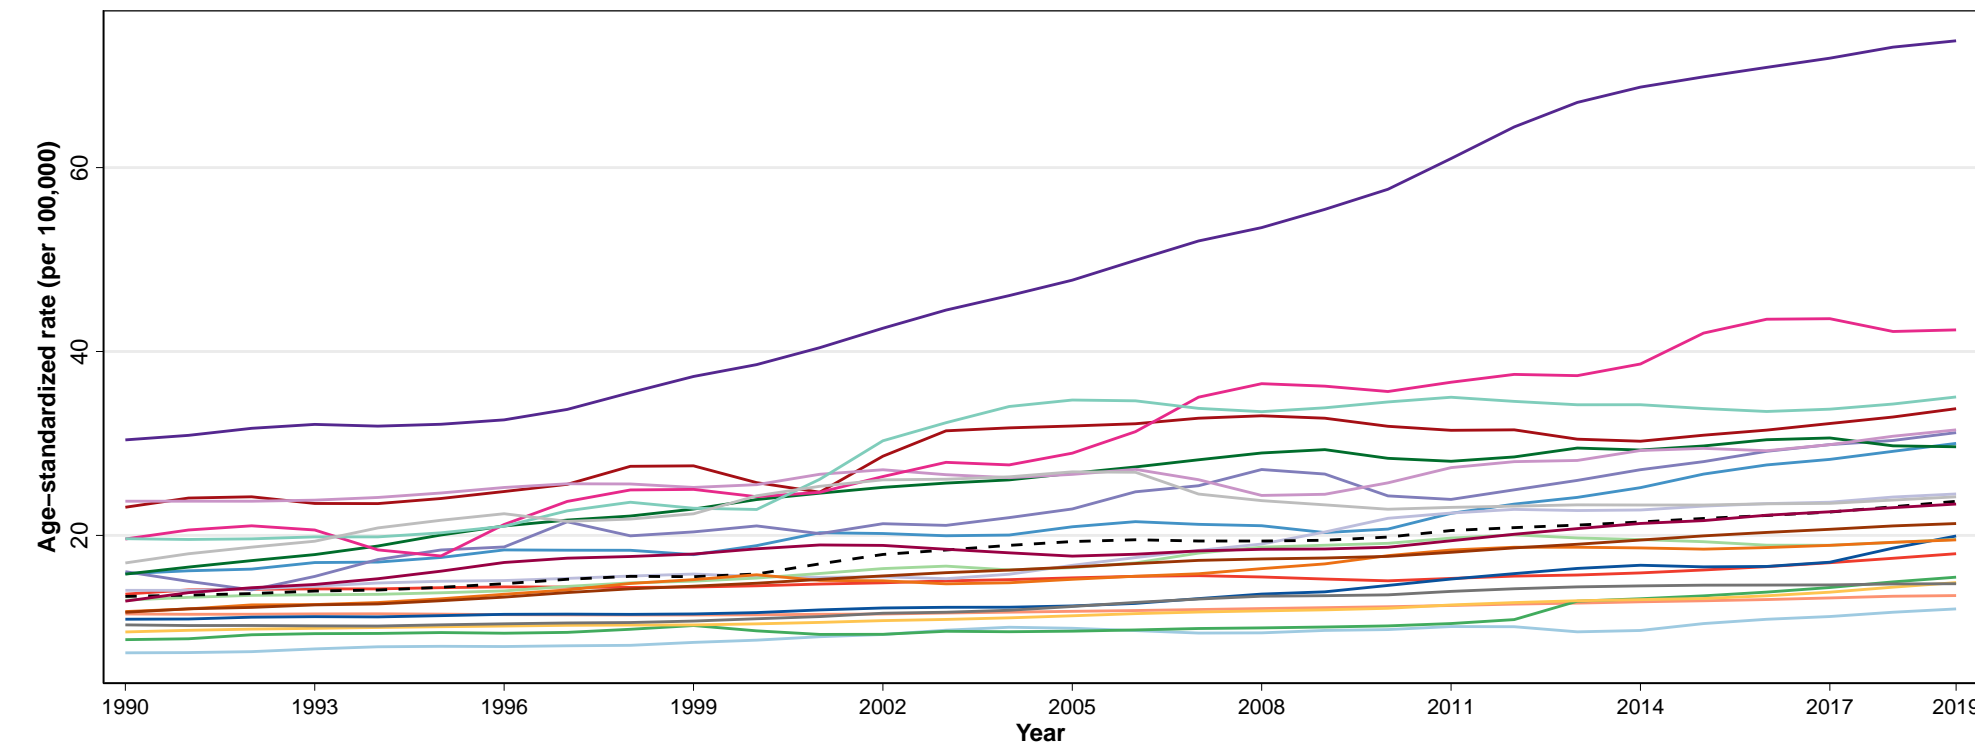

### Prevalence

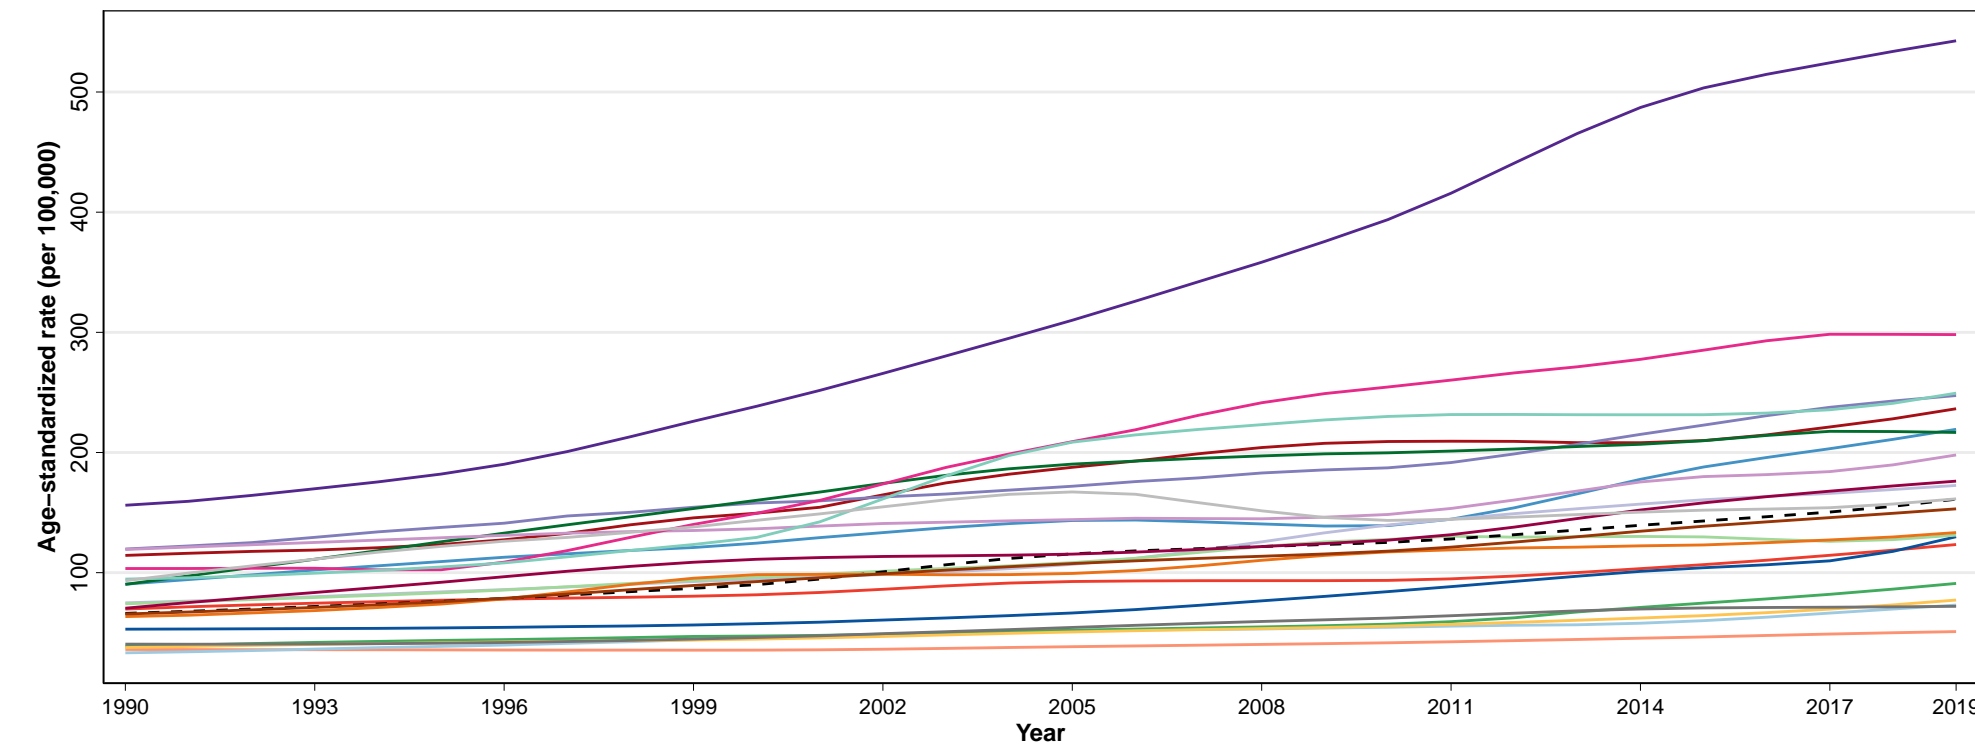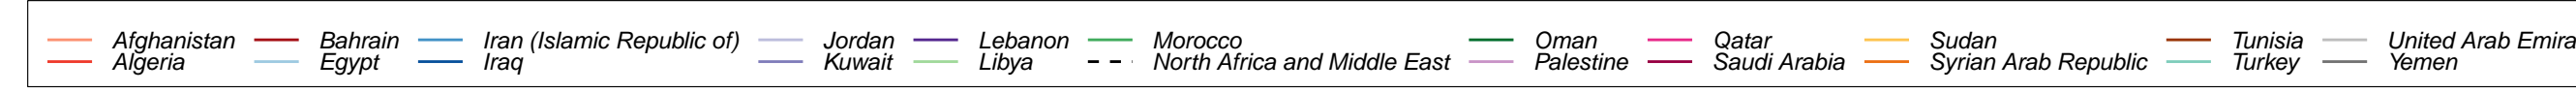

### Deaths

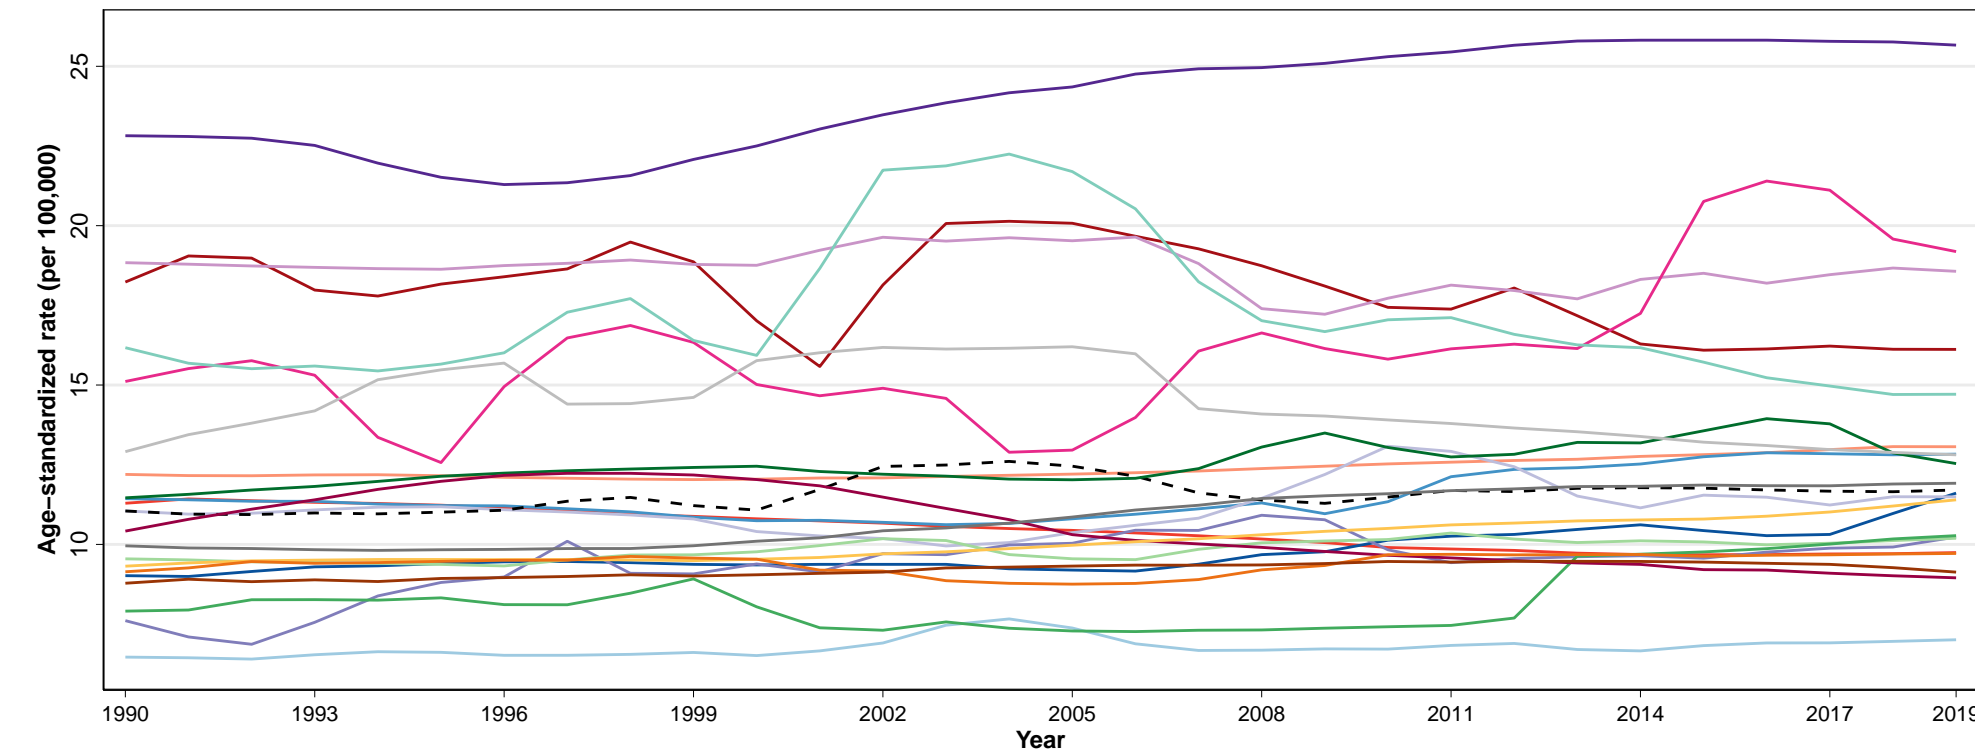

### DALYs

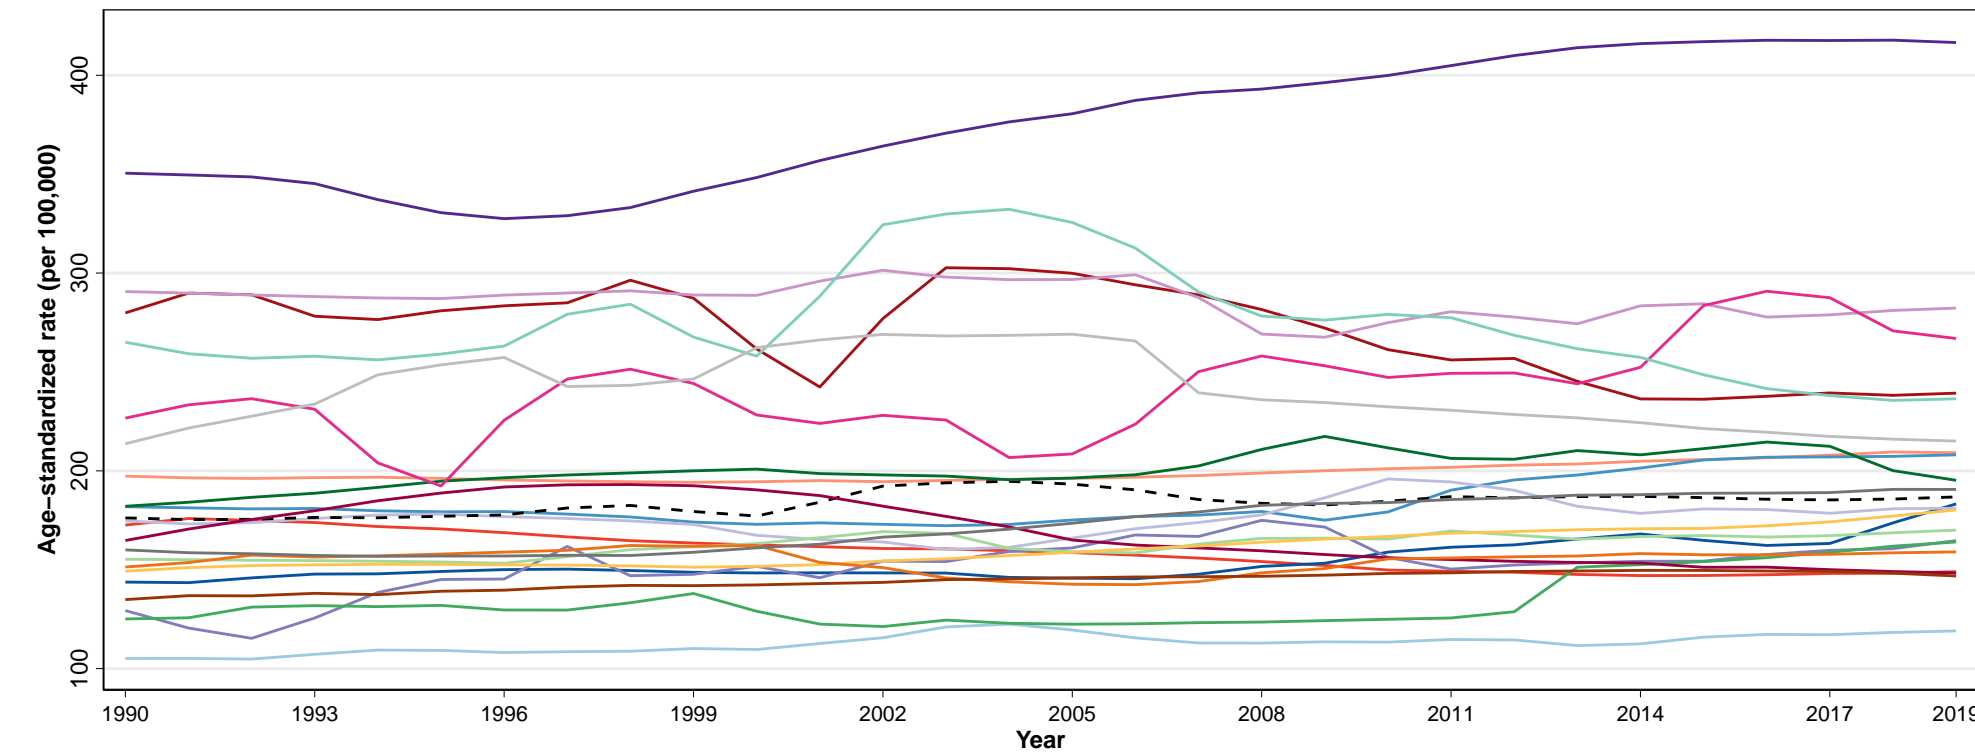

### Incidence

1990

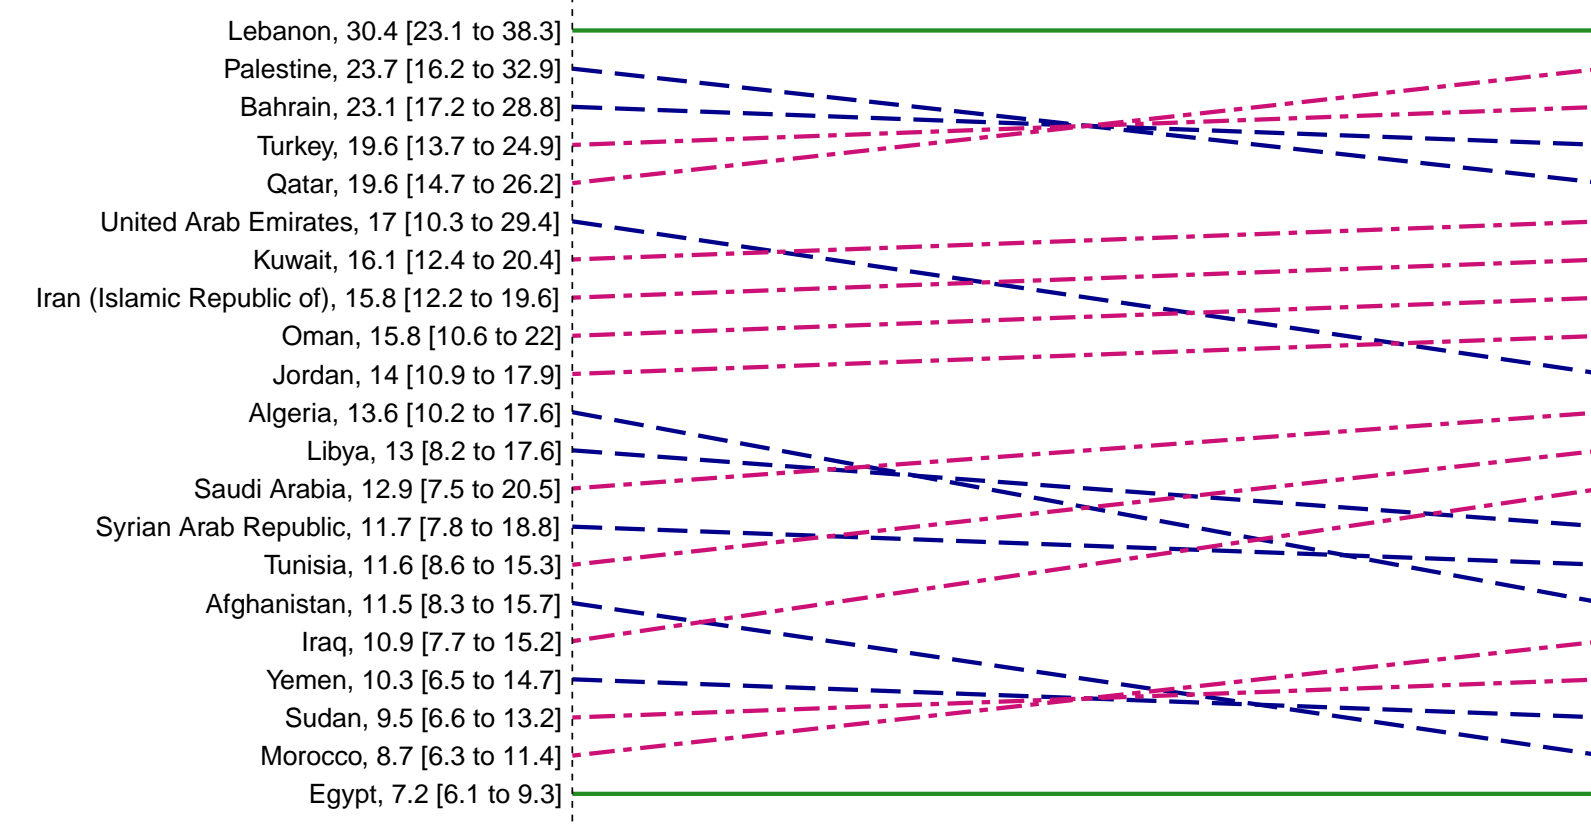

2019

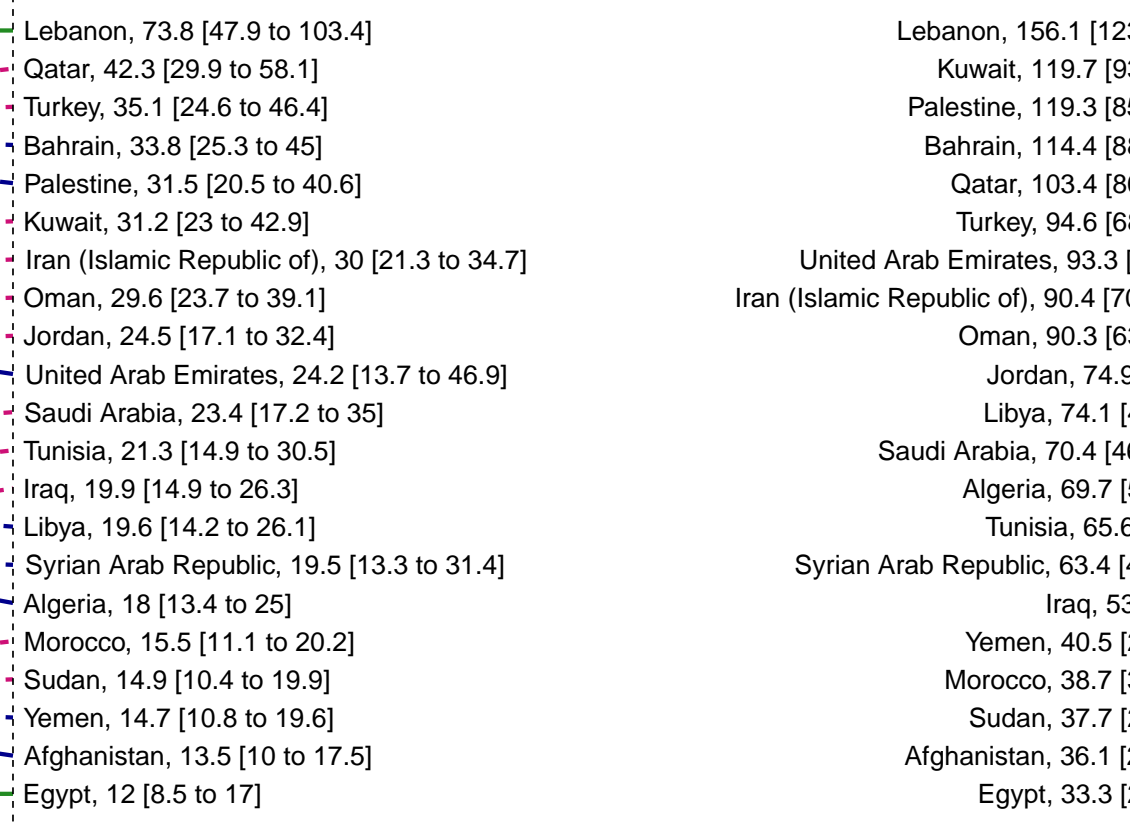

### Prevalence

1990

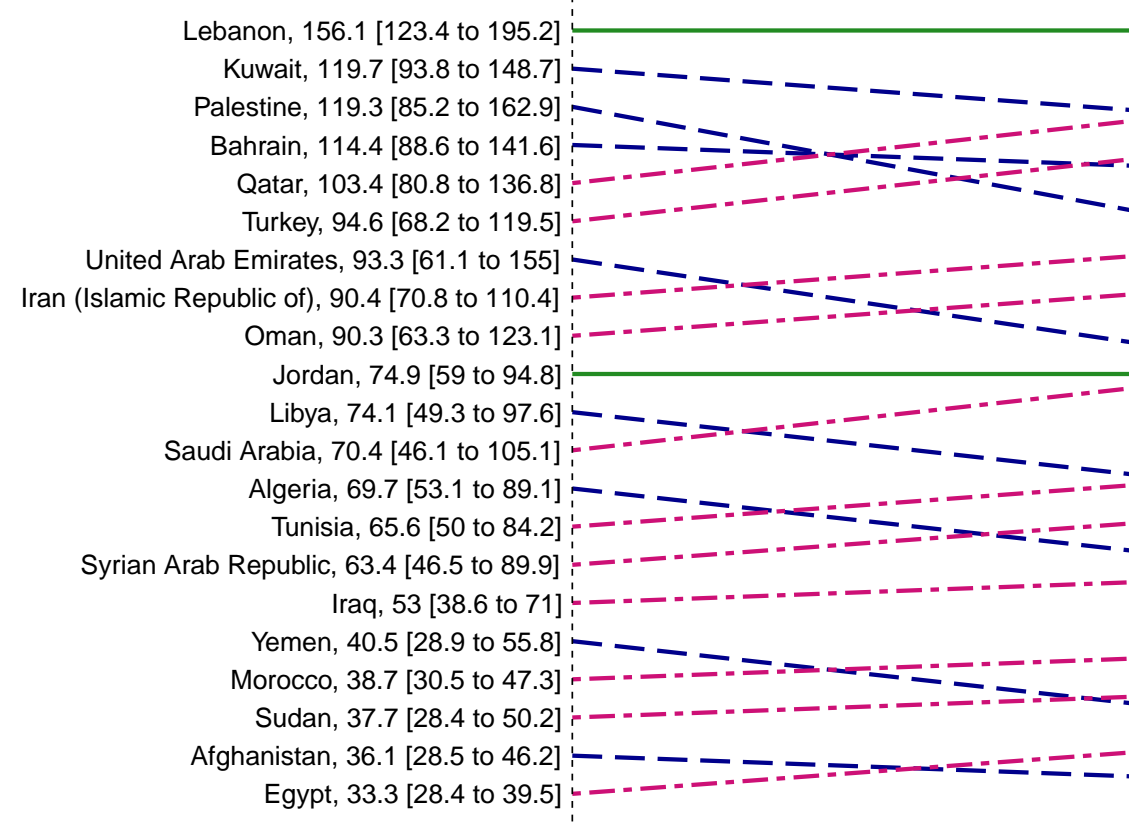

2019

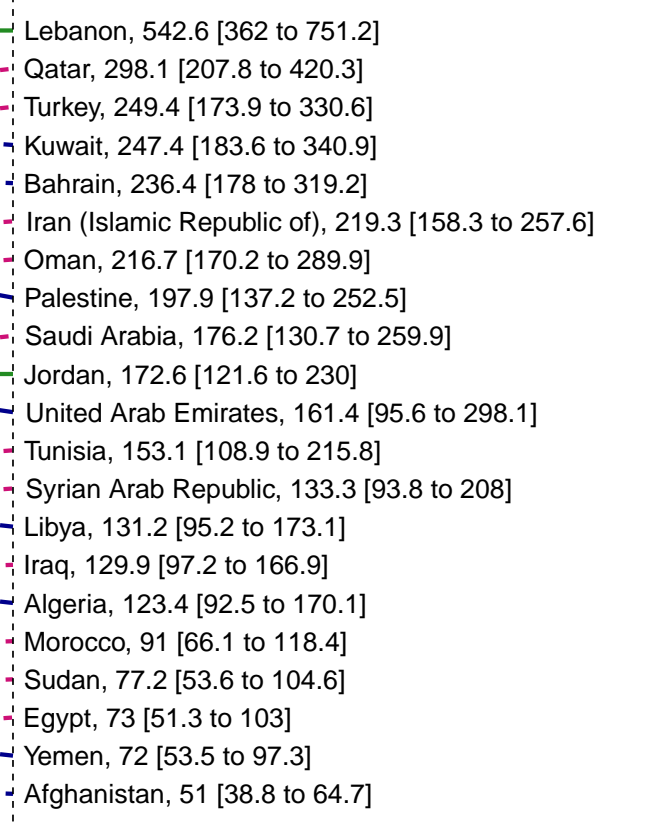

### Deaths

1990

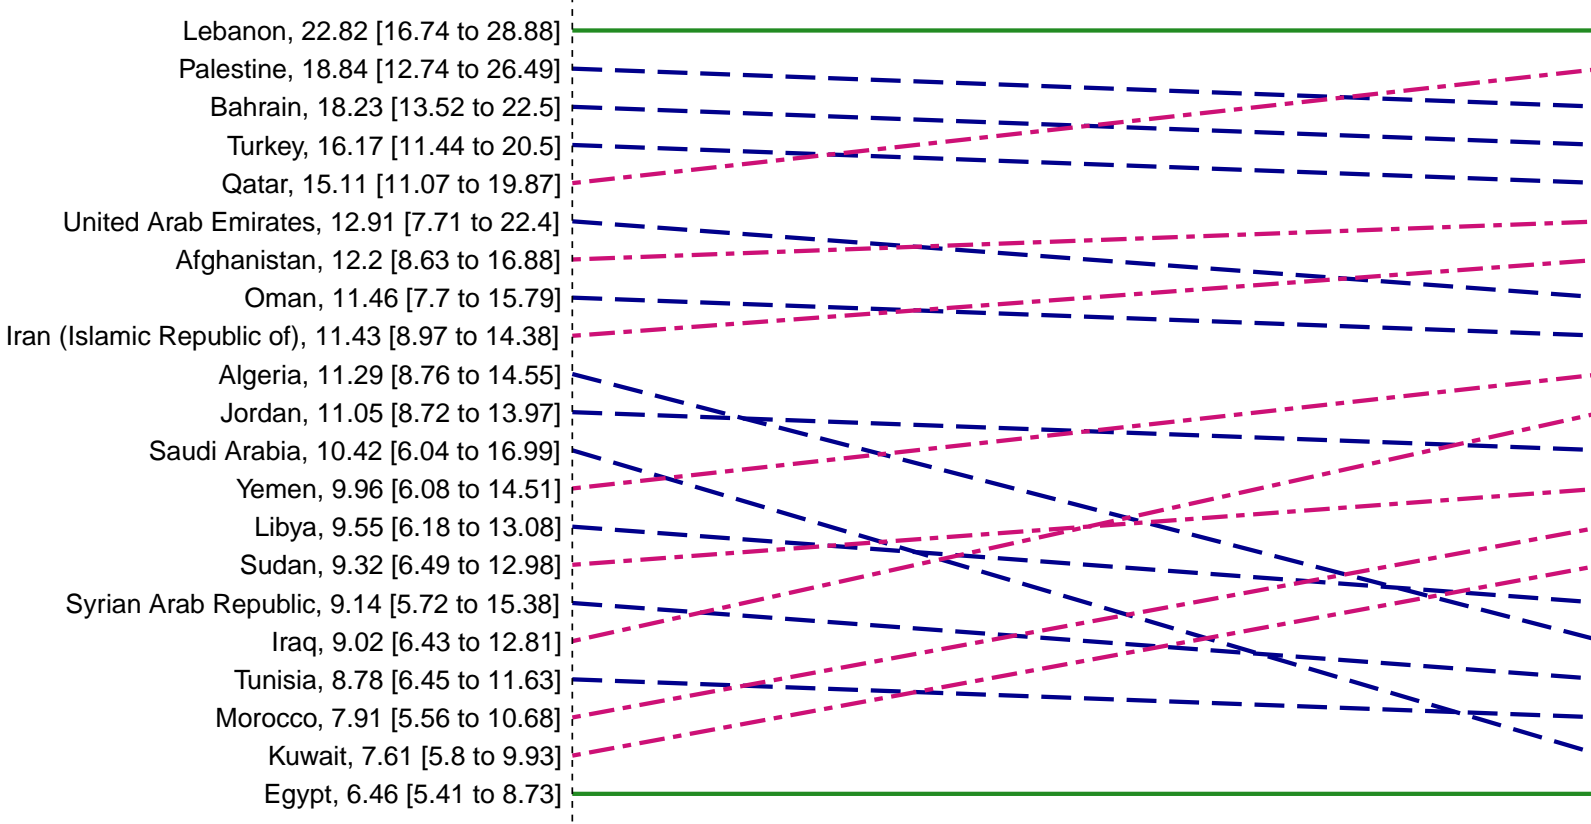

2019

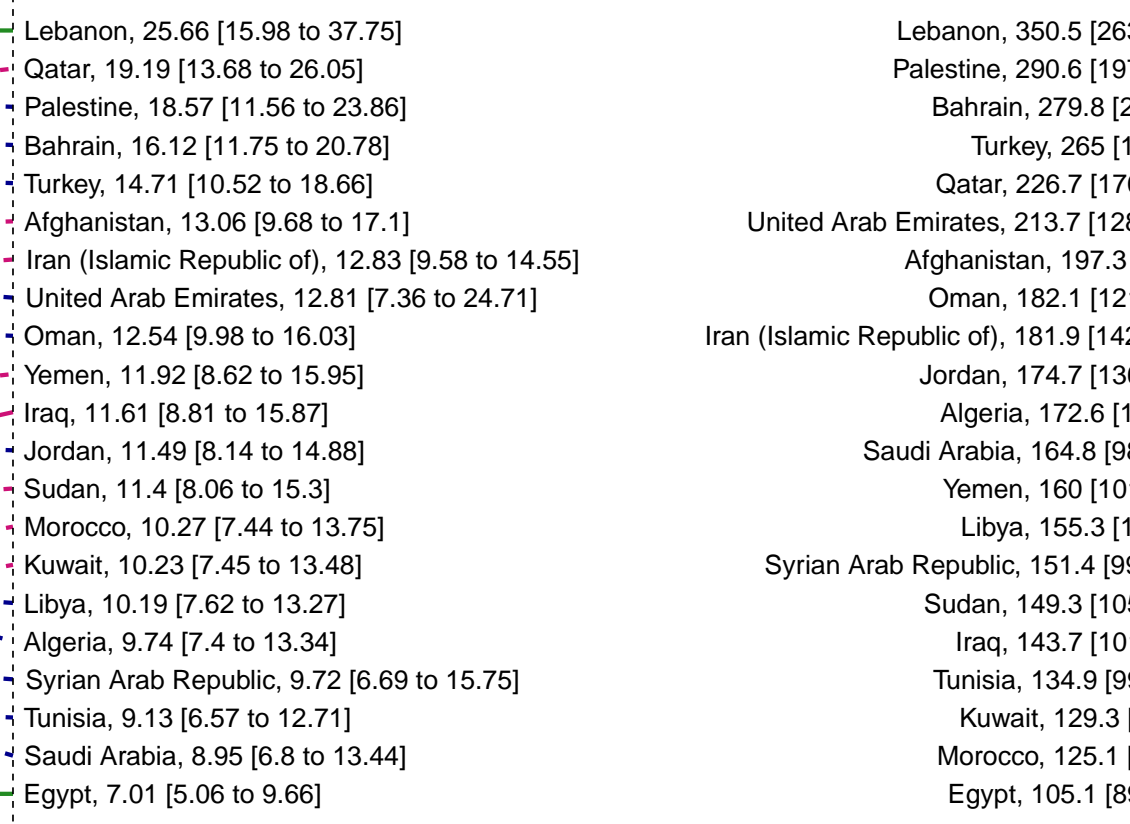

### Ranking

Upward Monotone Downward

### DALYs

1990

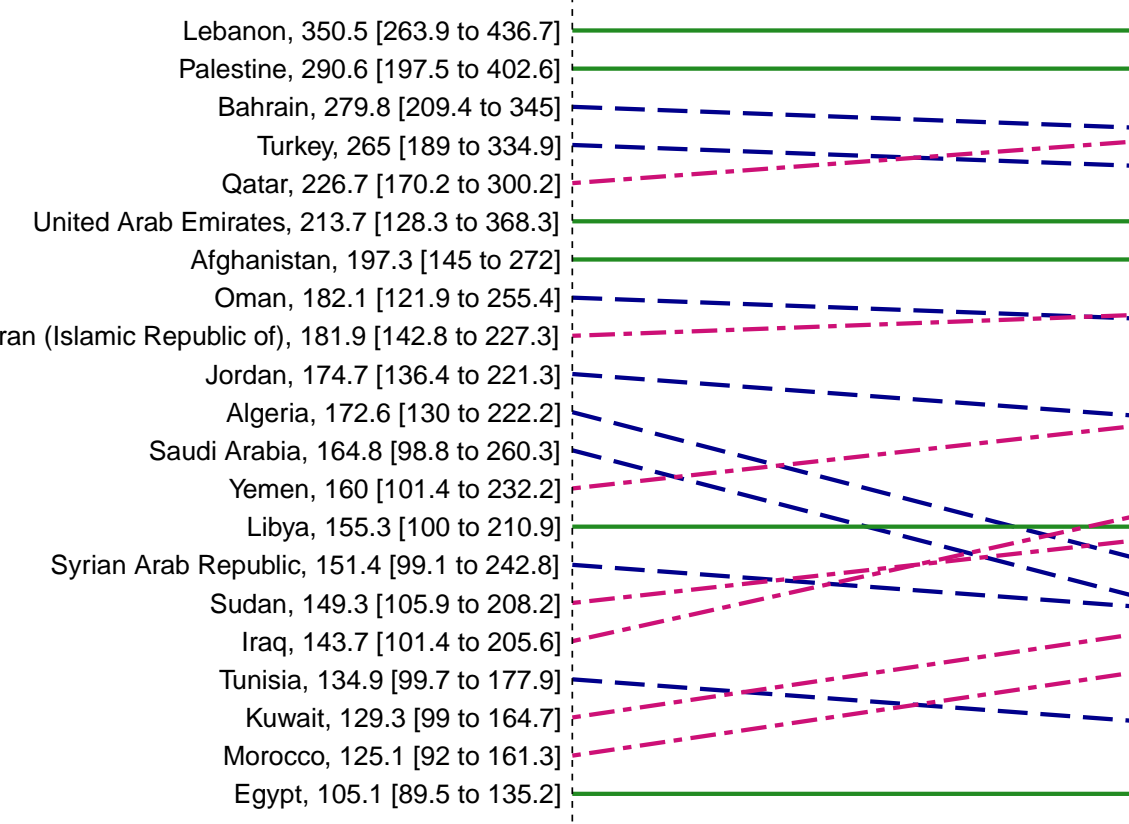

2019

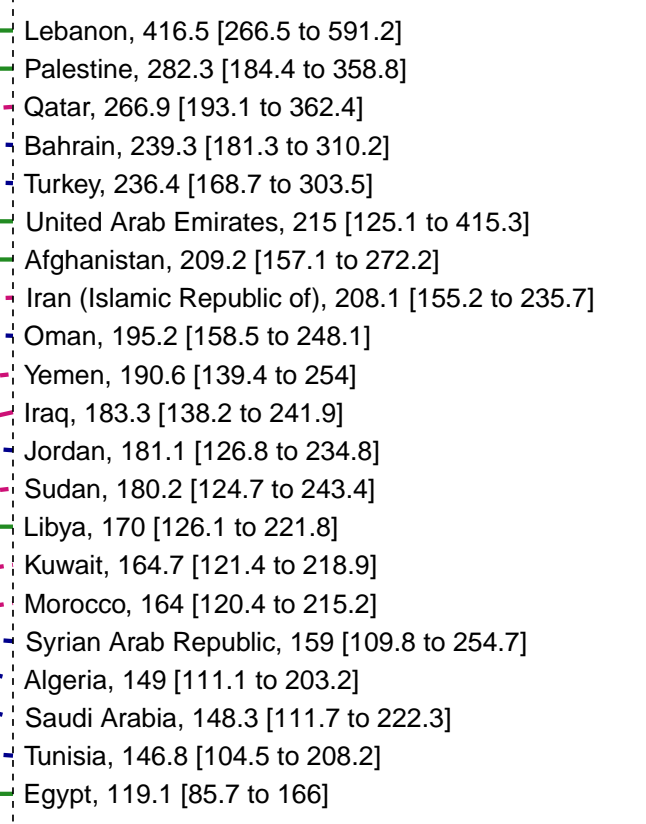

# Afghanistan

**Incidence**  
1990 2019

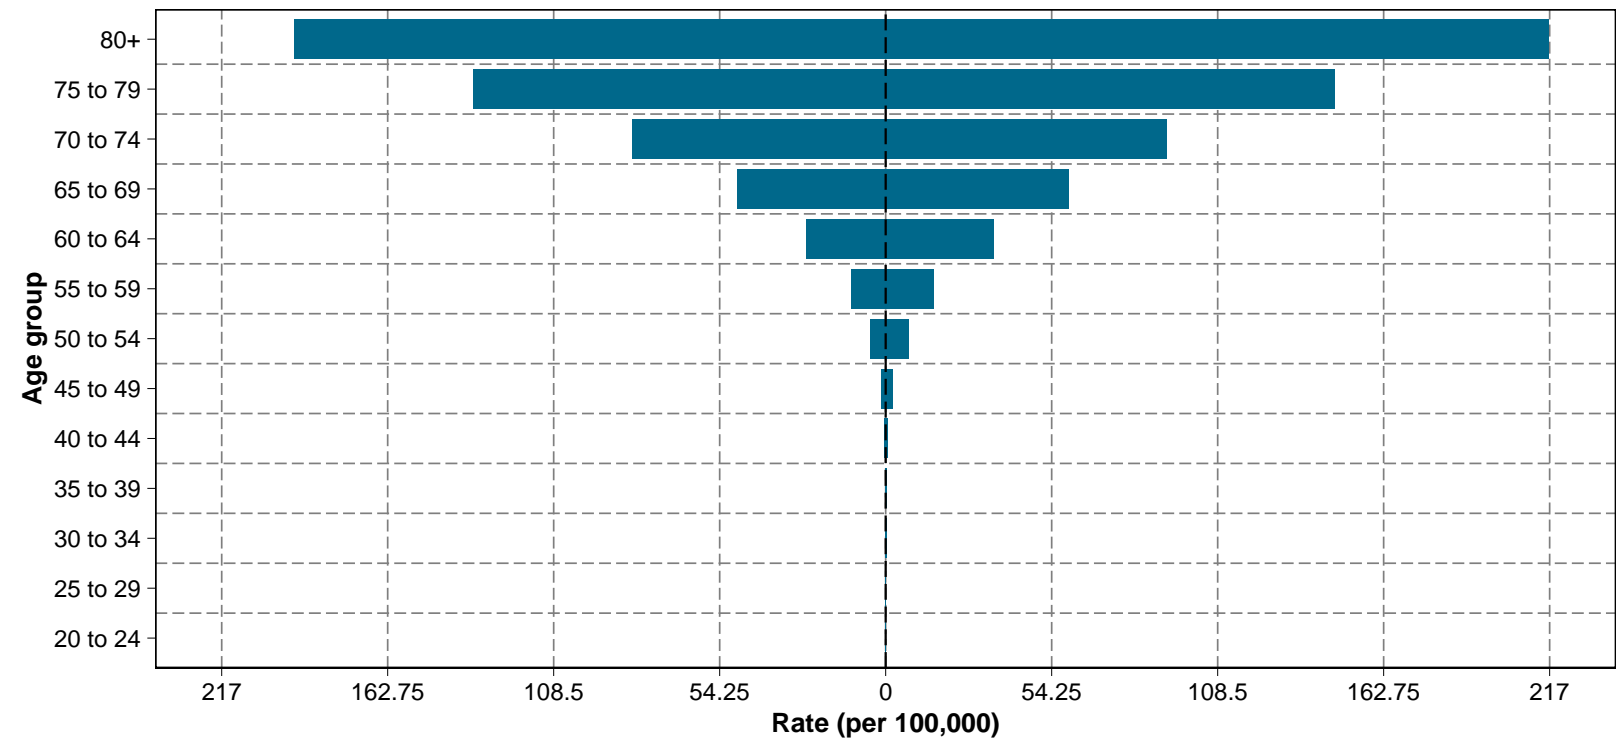

**Prevalence**  
1990 2019

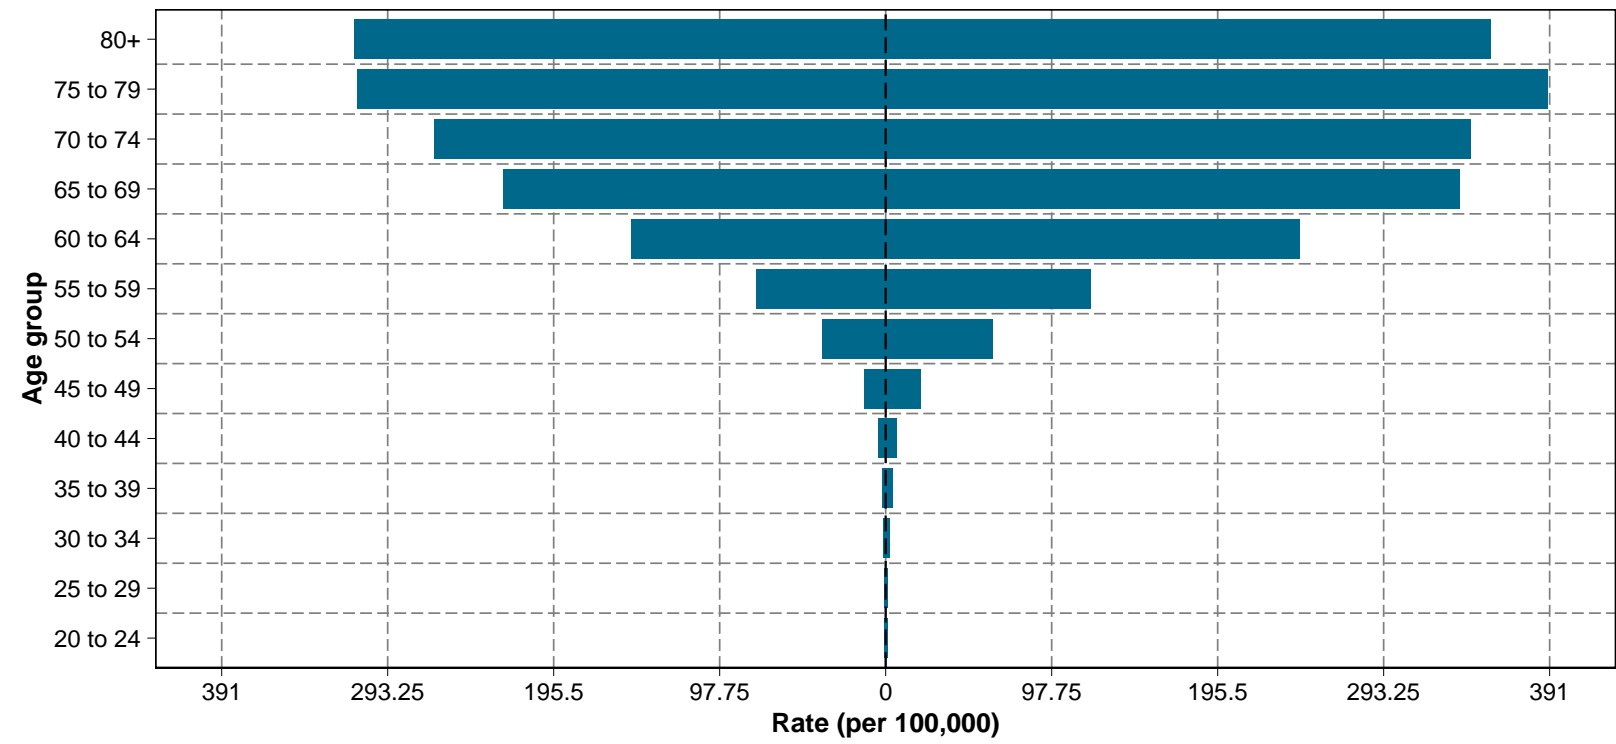

**Deaths**  
1990 2019

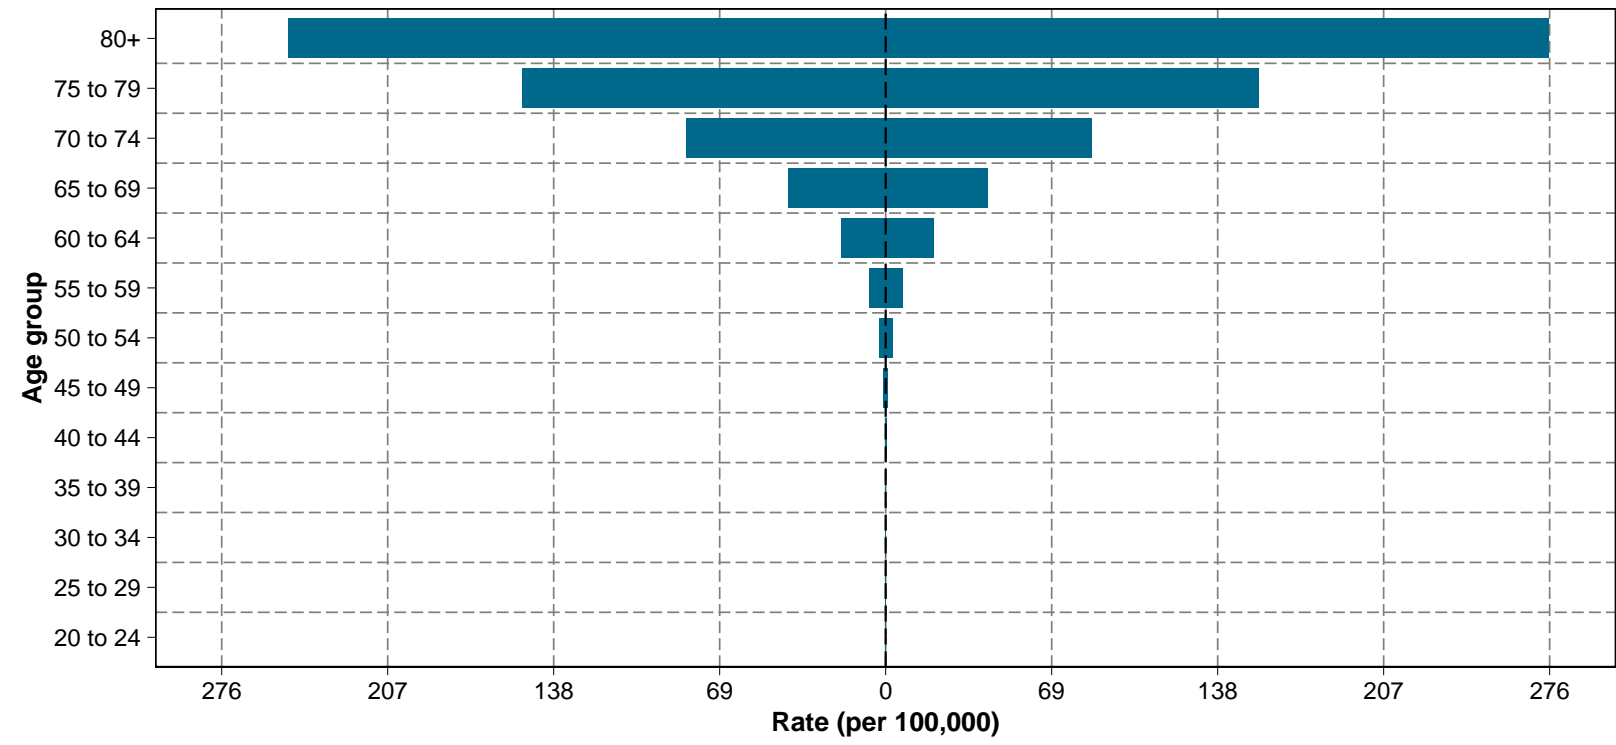

**DALYs**  
1990 2019

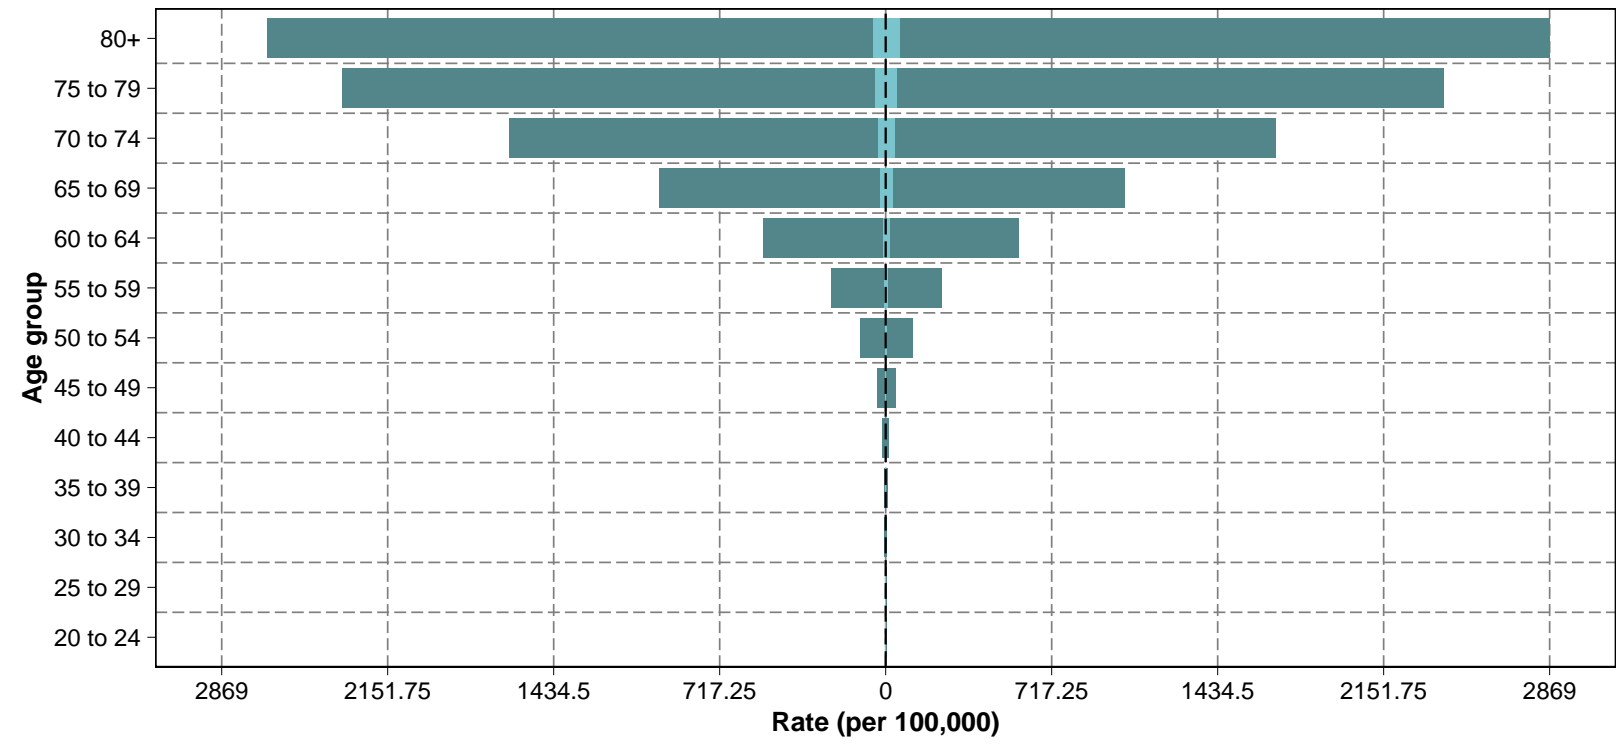



# Algeria

**Incidence**  
1990 2019

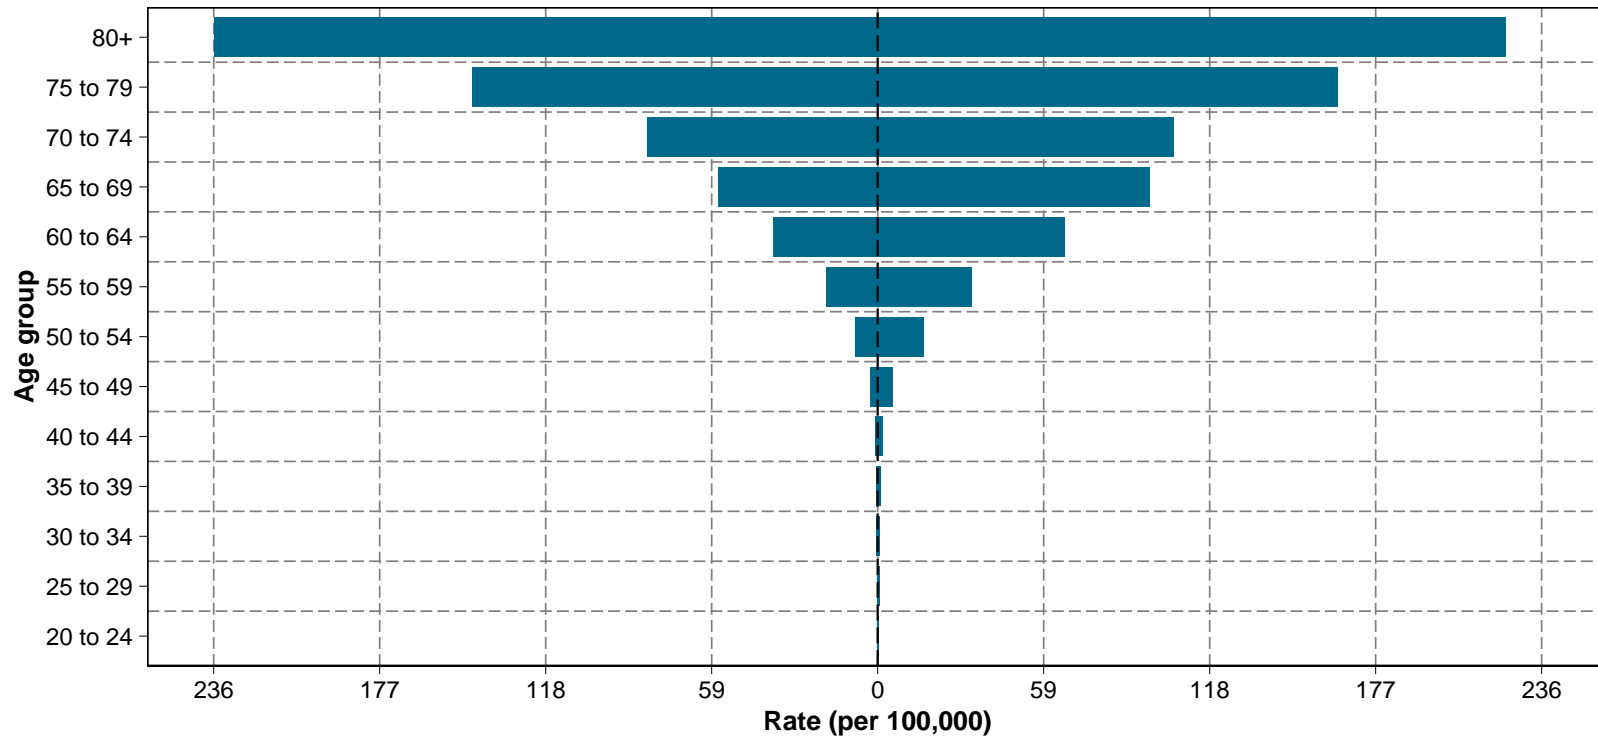

**Prevalence**  
1990 2019

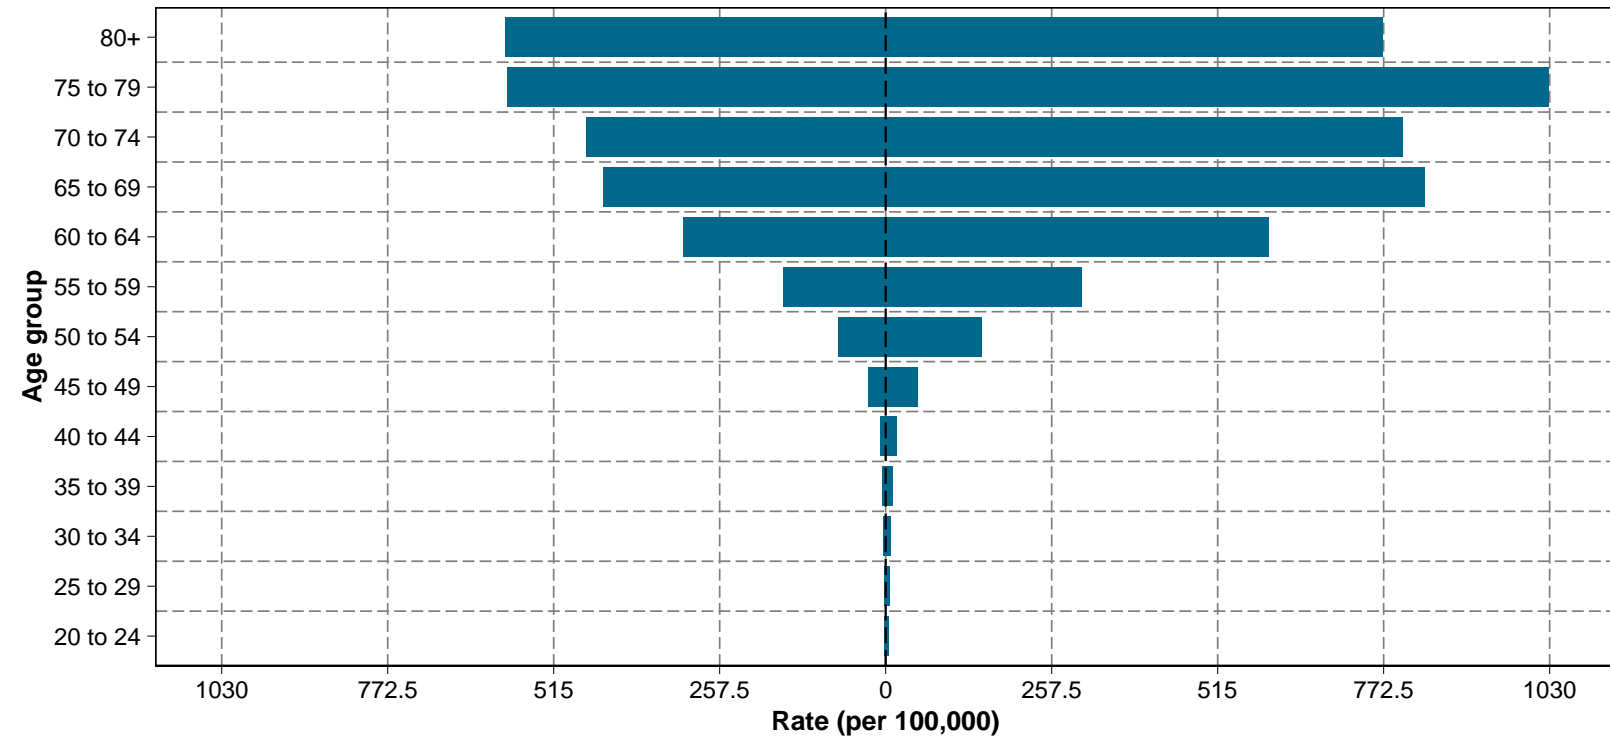

**Deaths**  
1990 2019

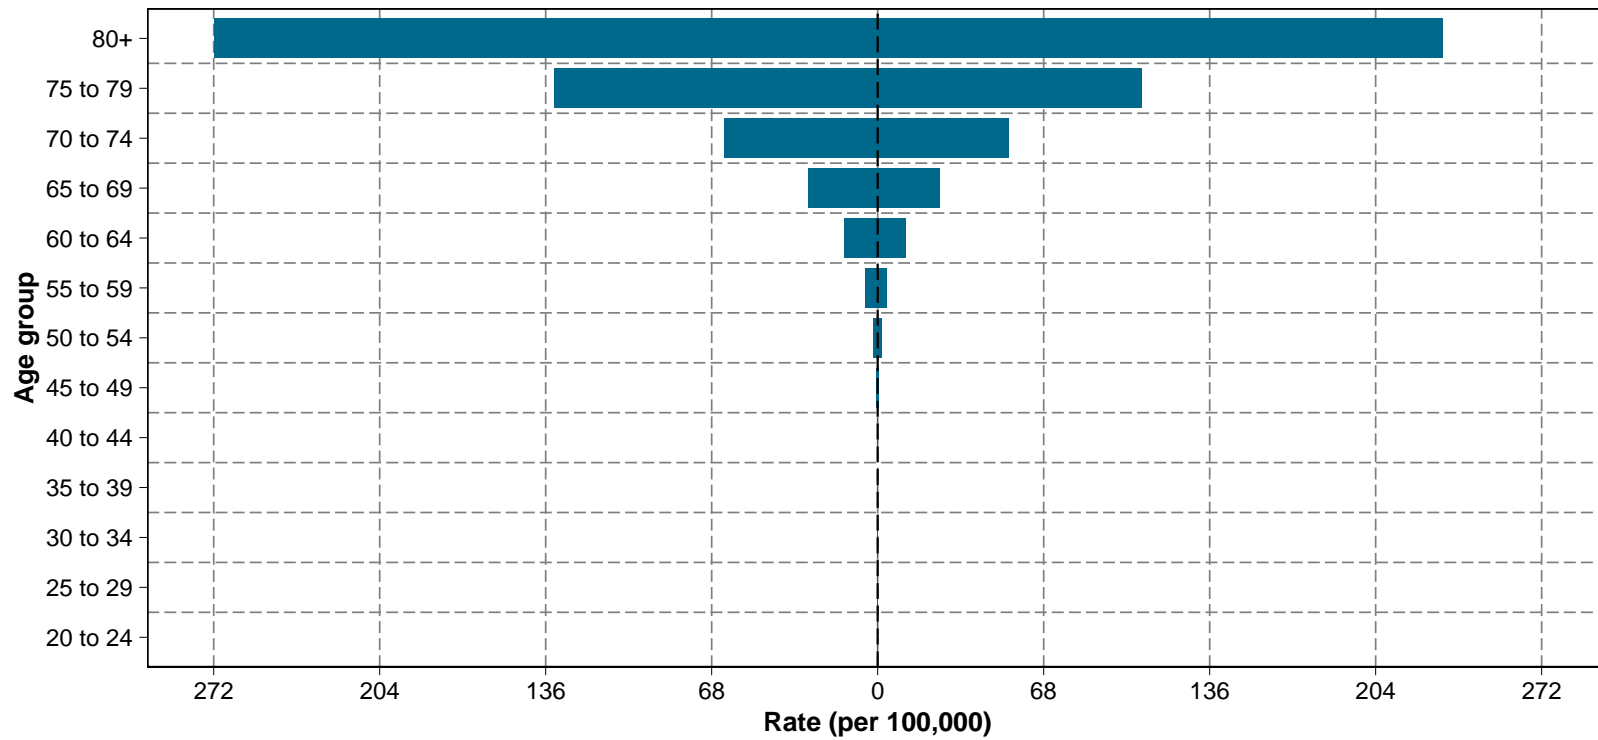

**DALYs**  
1990 2019

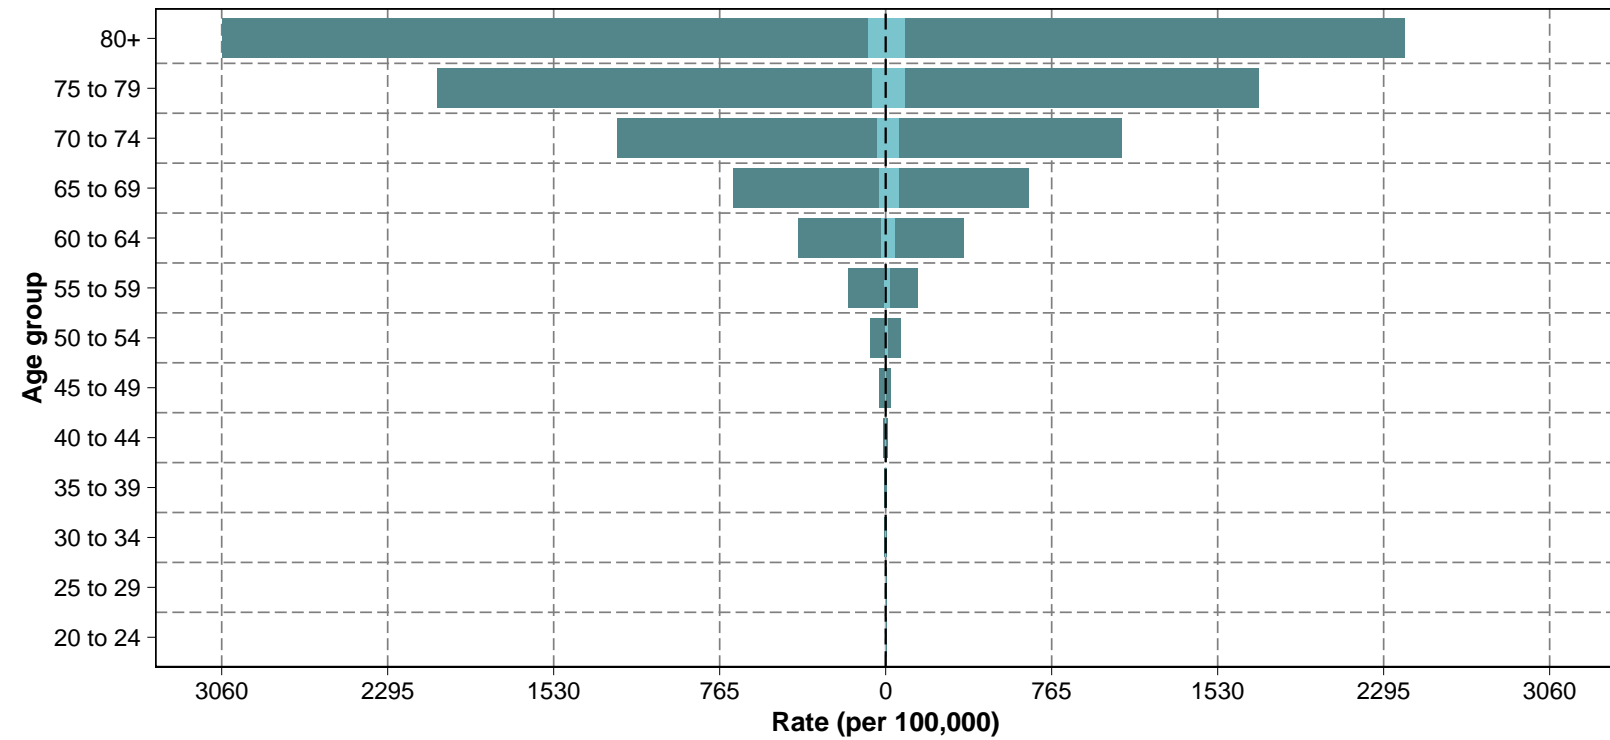

# Bahrain

**Incidence**  
1990 2019

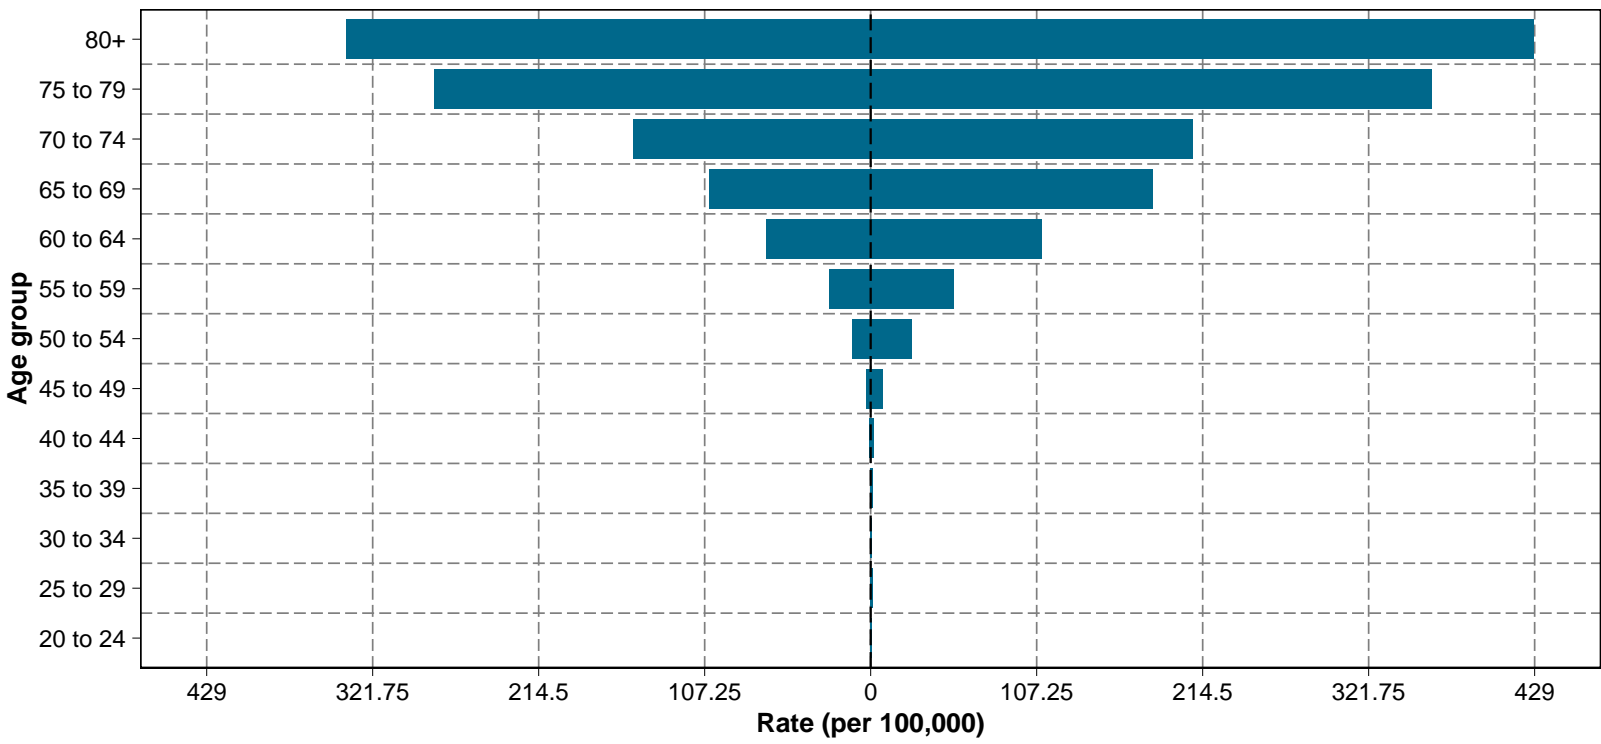

**Prevalence**  
1990 2019

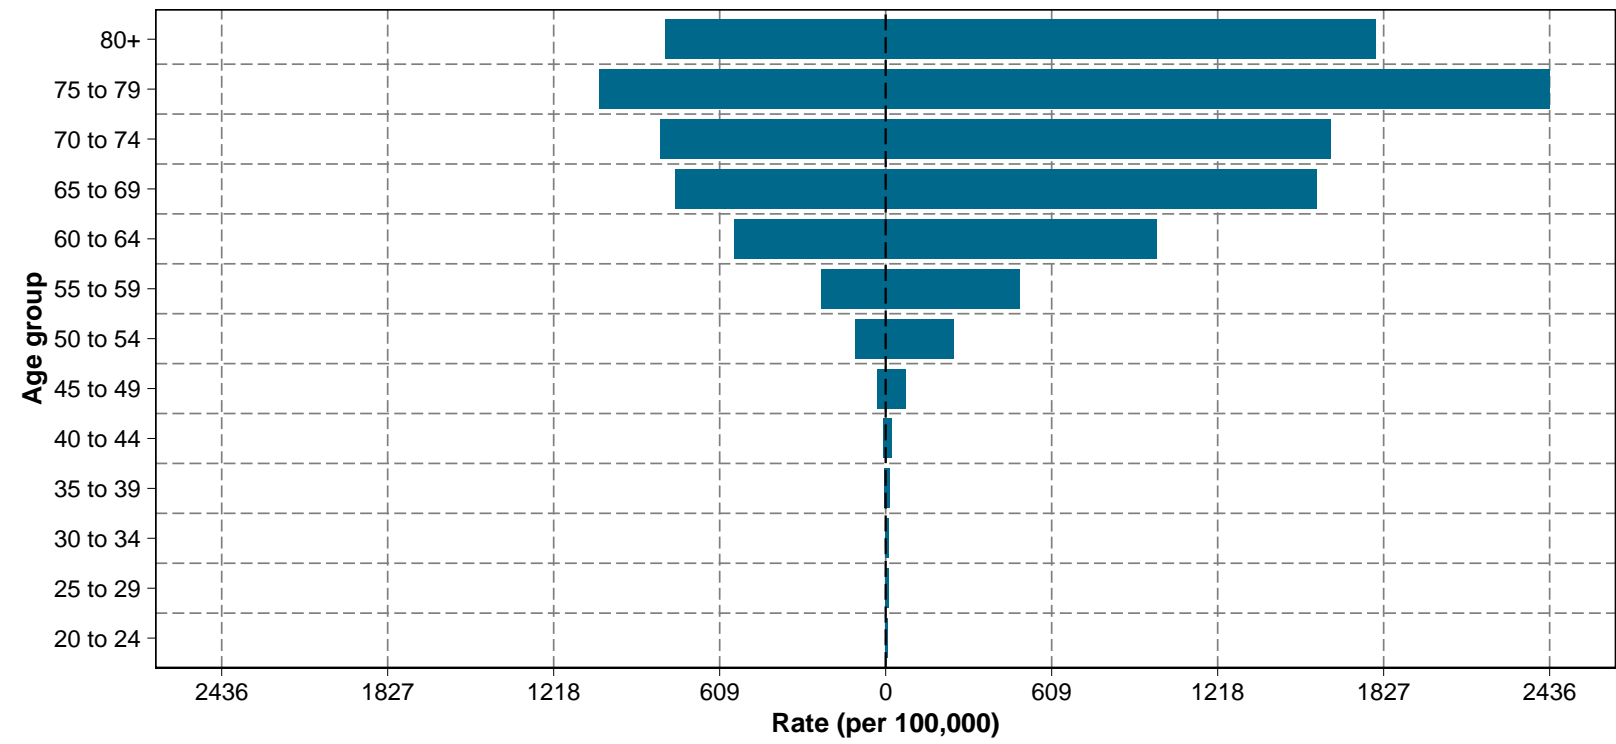

**Deaths**  
1990 2019

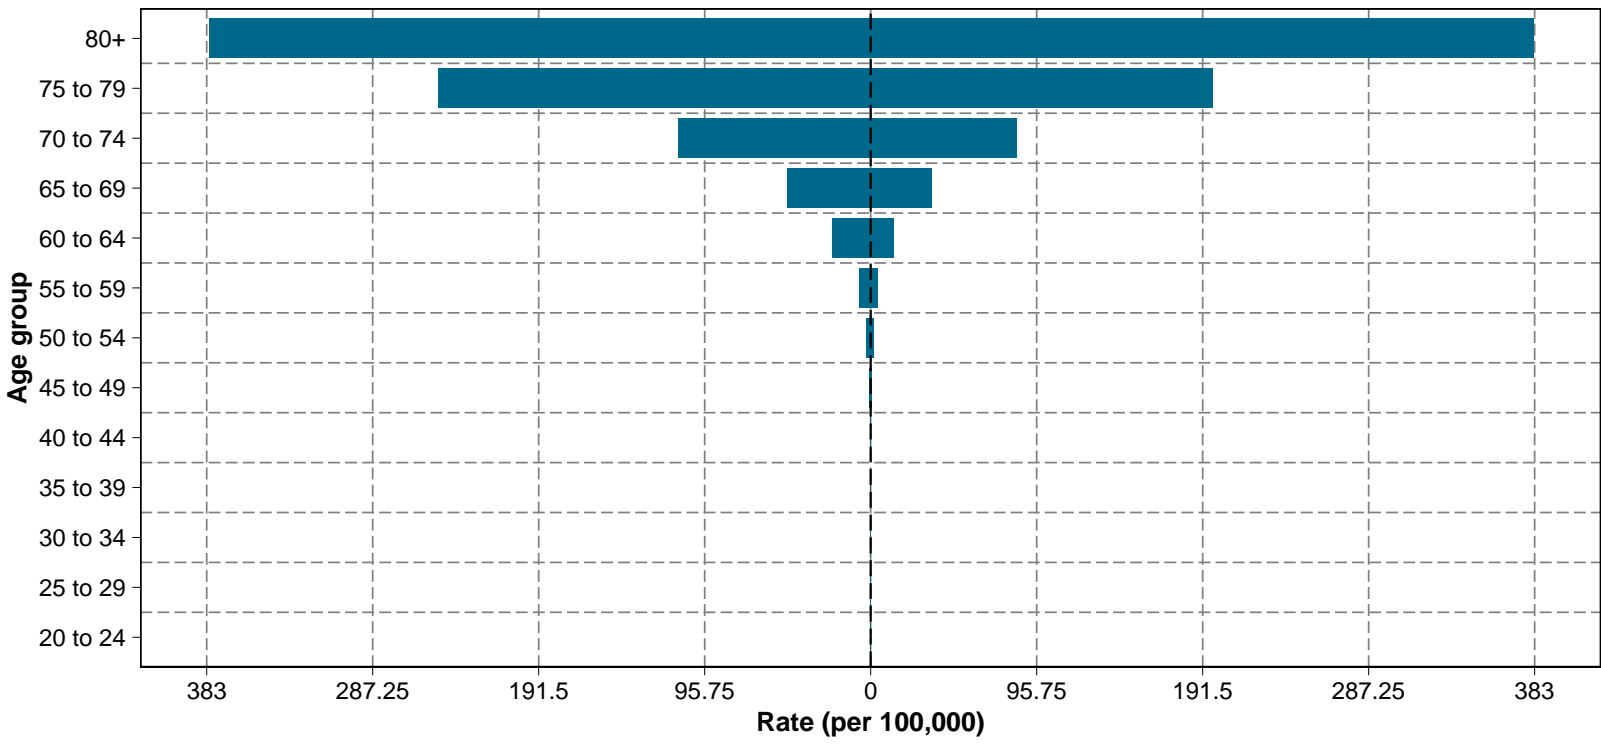

**DALYs**  
1990 2019

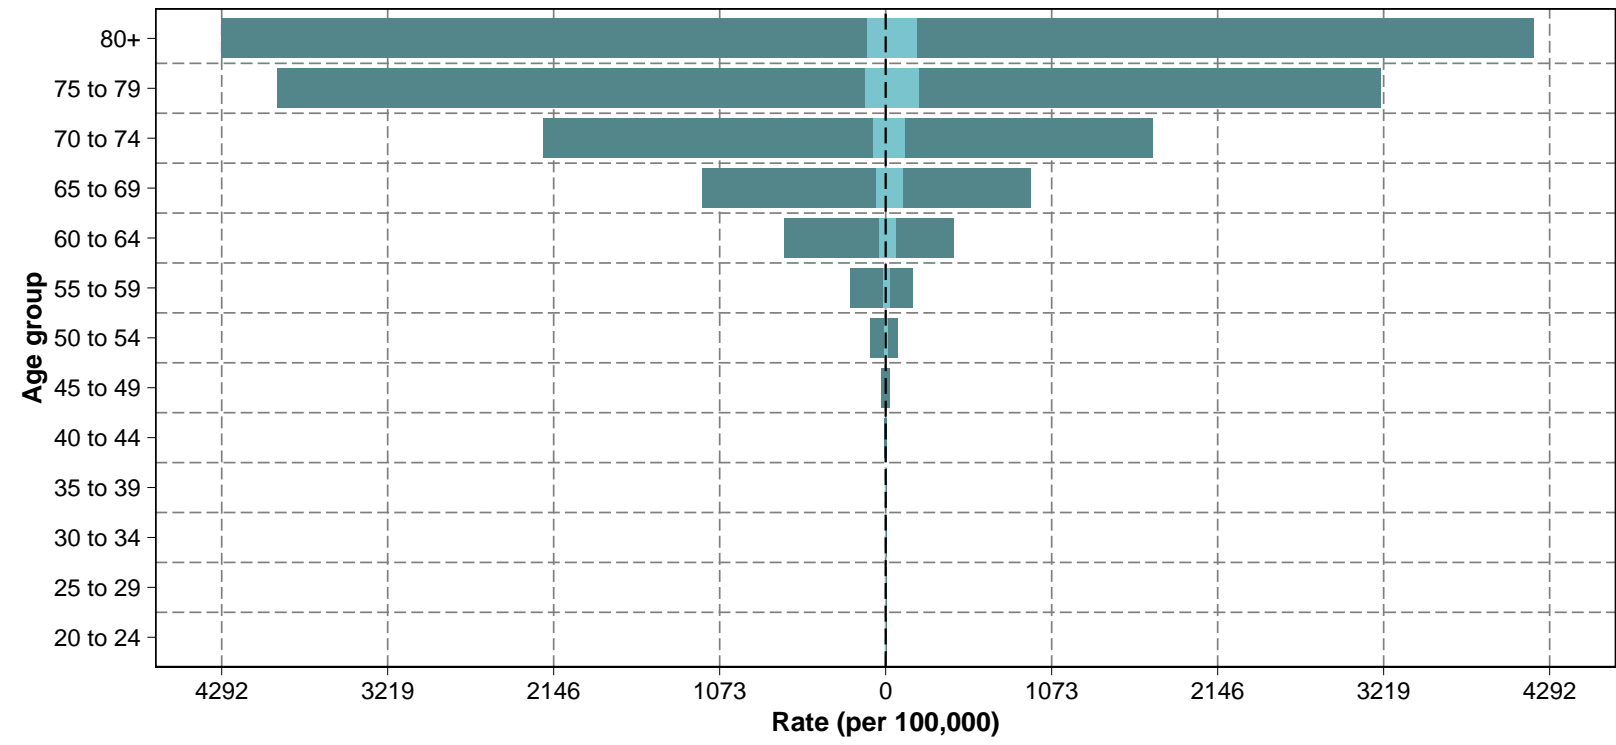

# Egypt

**Incidence**  
1990 2019

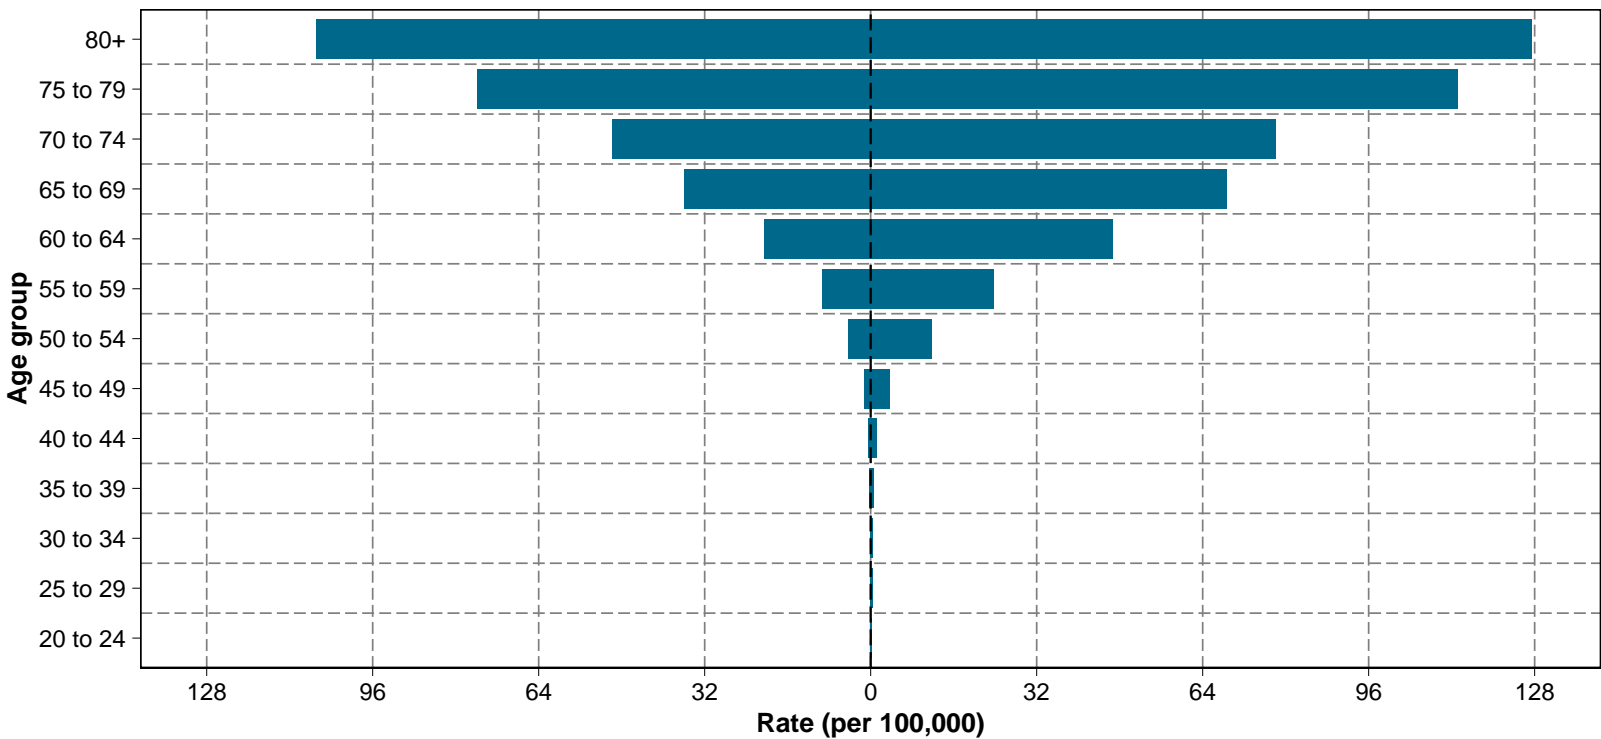

**Prevalence**  
1990 2019

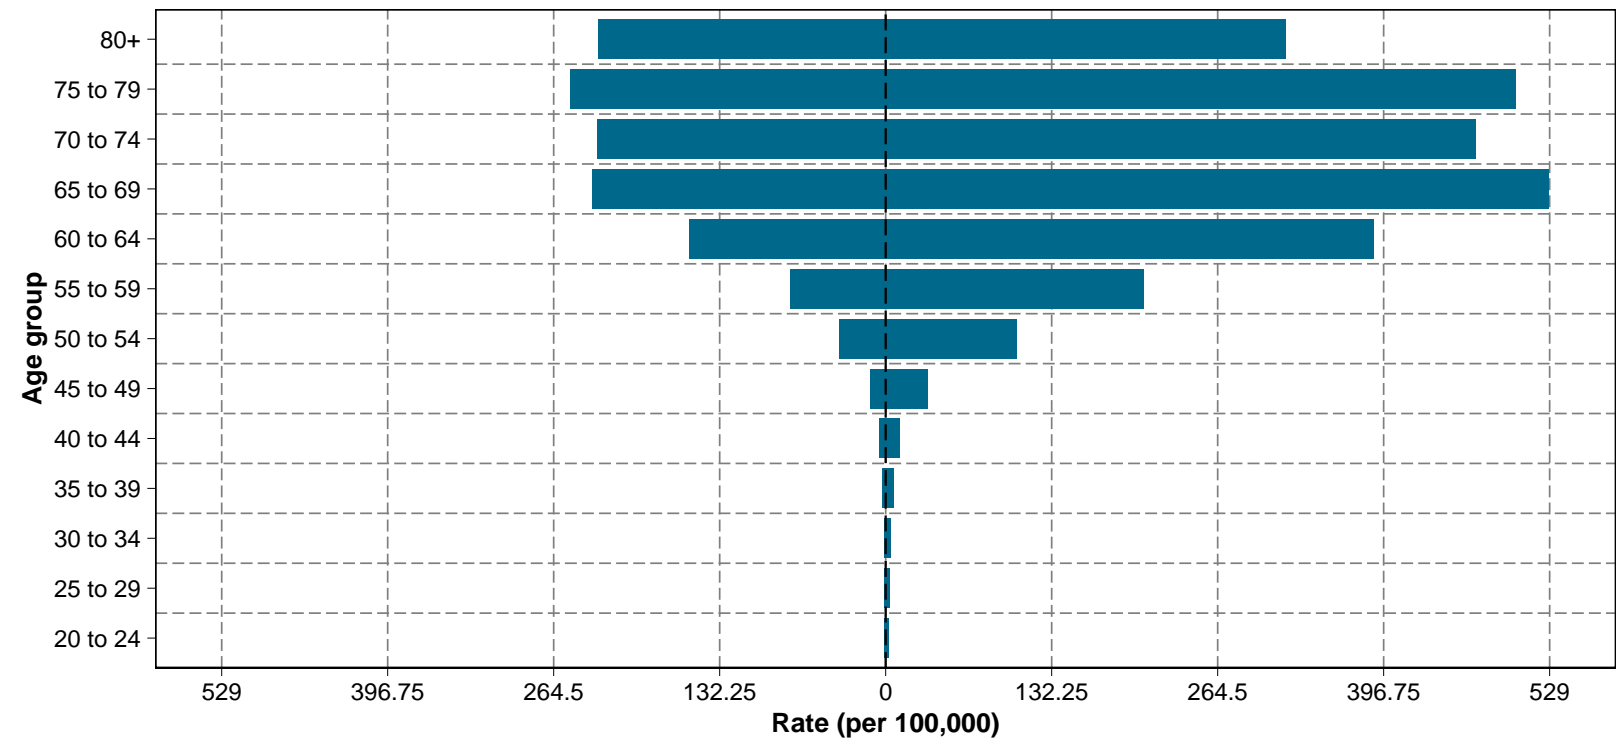

**Deaths**  
1990 2019

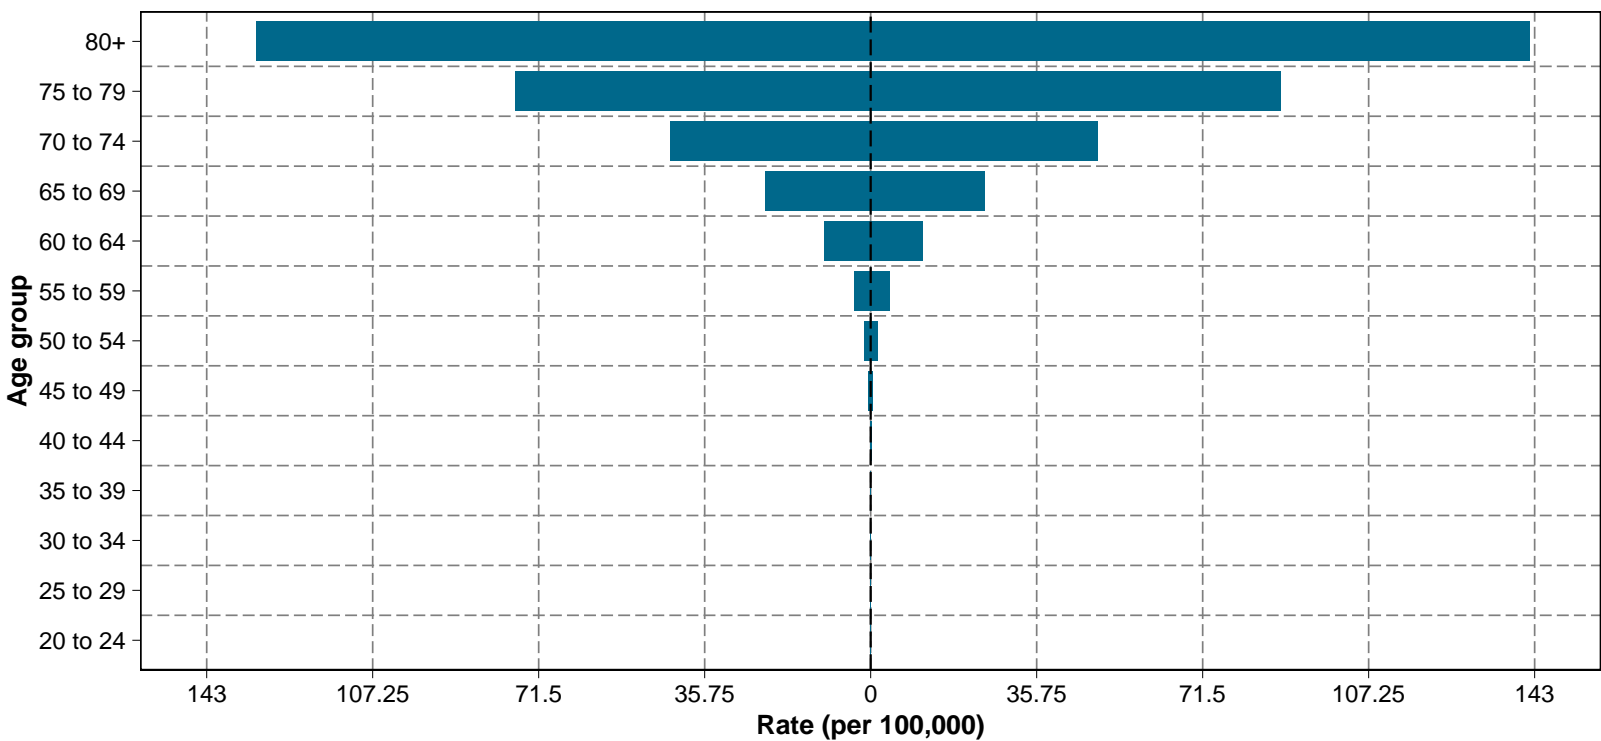

**DALYs**  
1990 2019

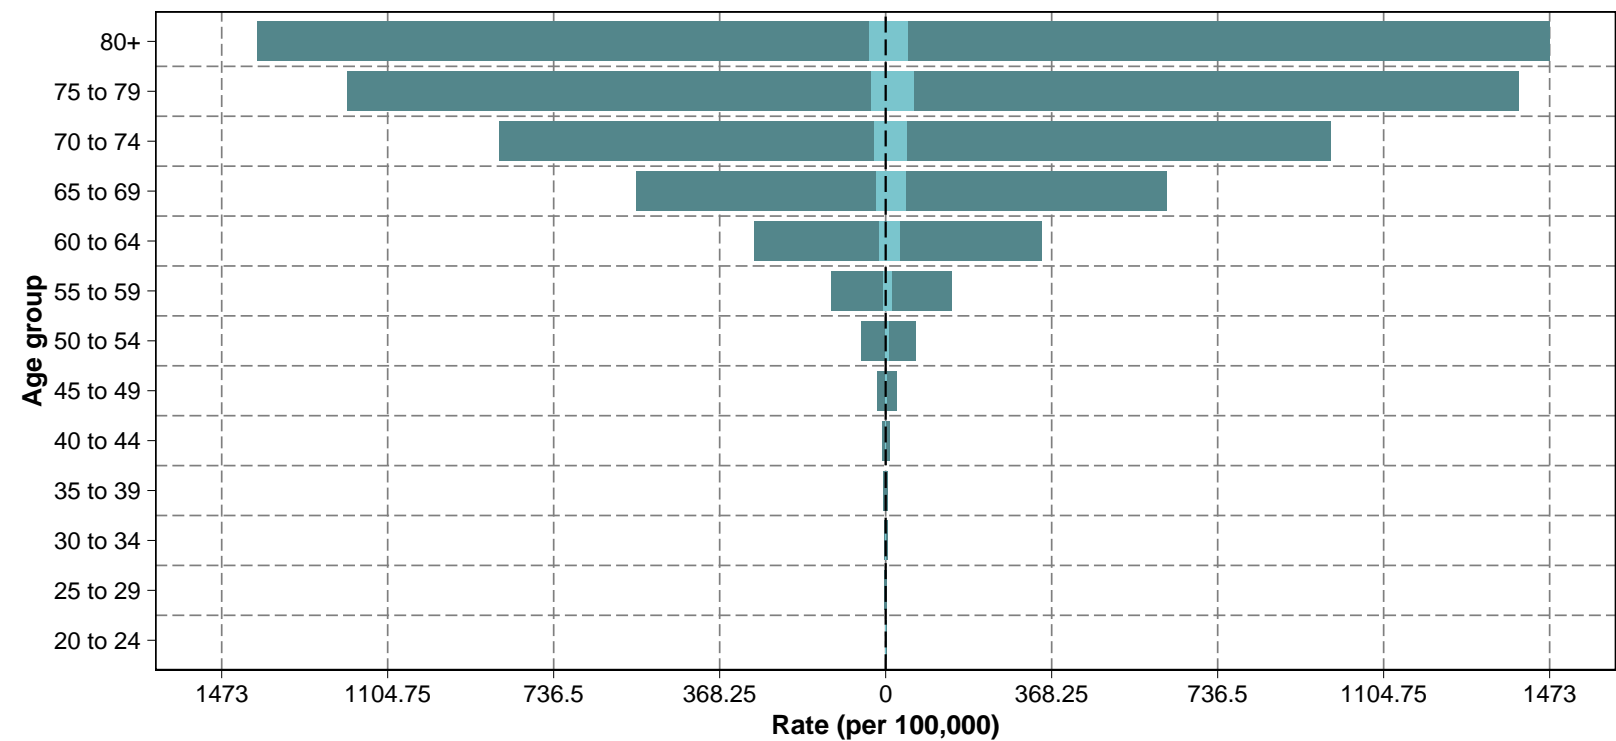

# Iran (Islamic Republic of)

**Incidence**  
1990 2019

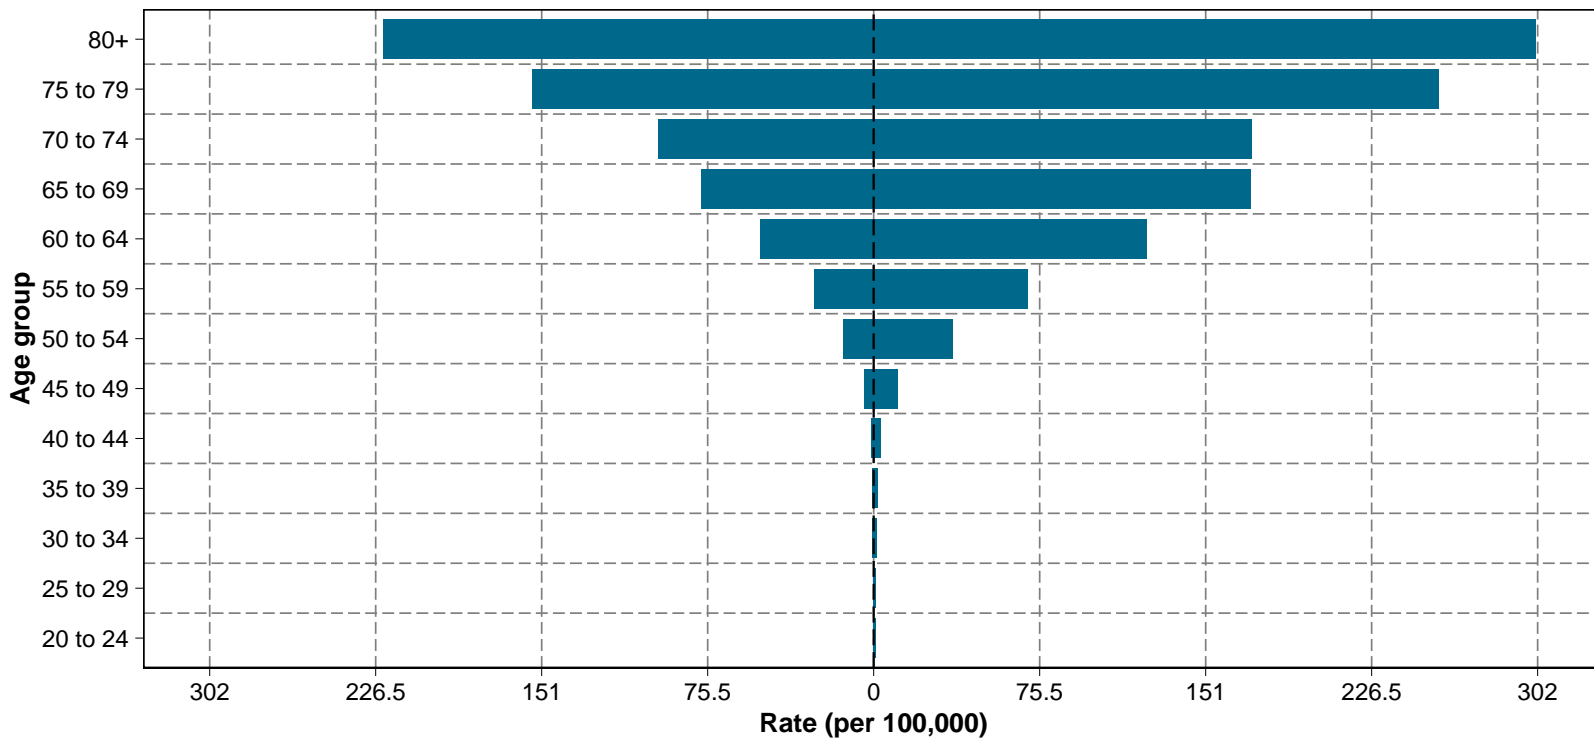

**Prevalence**  
1990 2019

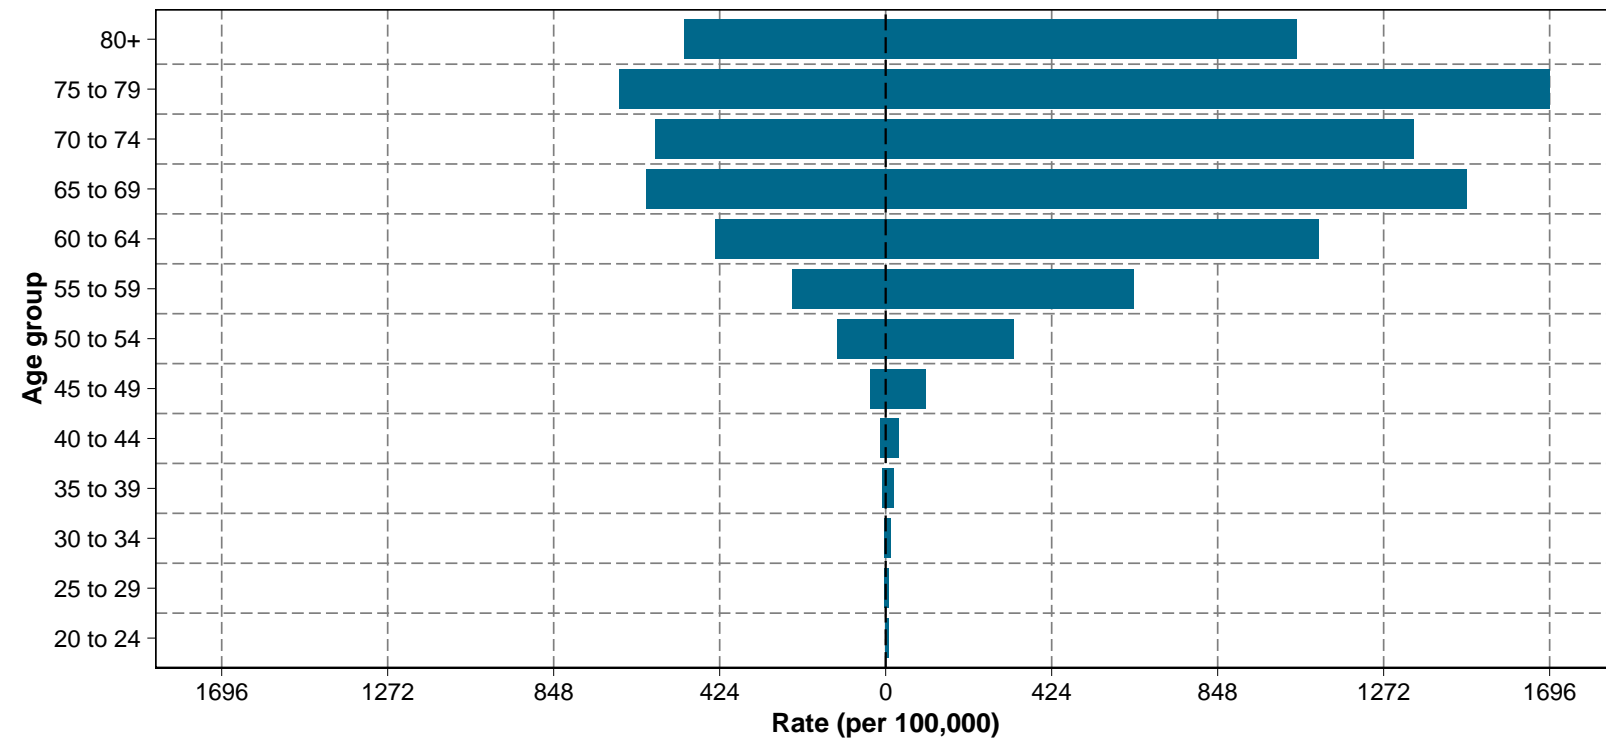

**Deaths**  
1990 2019

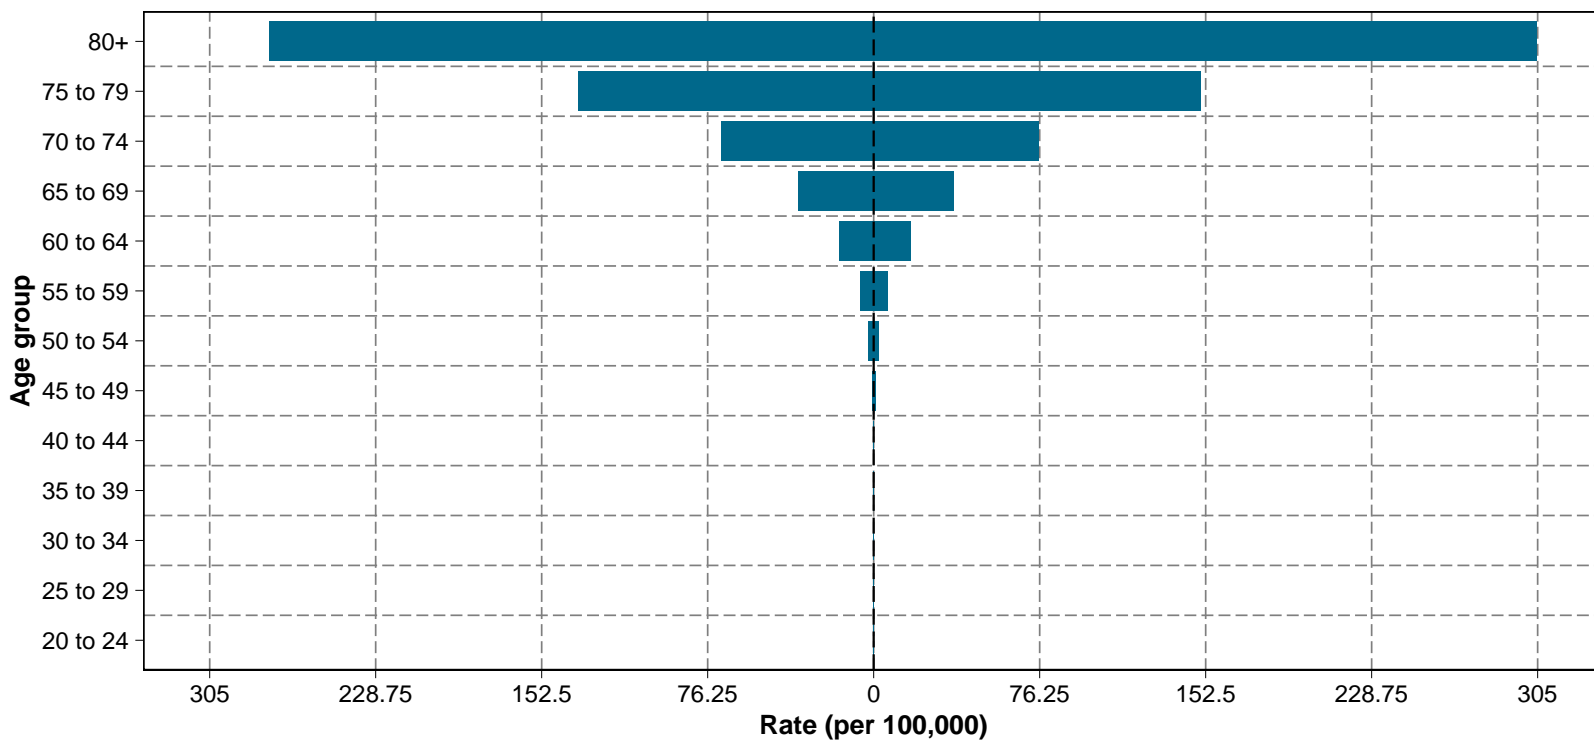

**DALYs**  
1990 2019

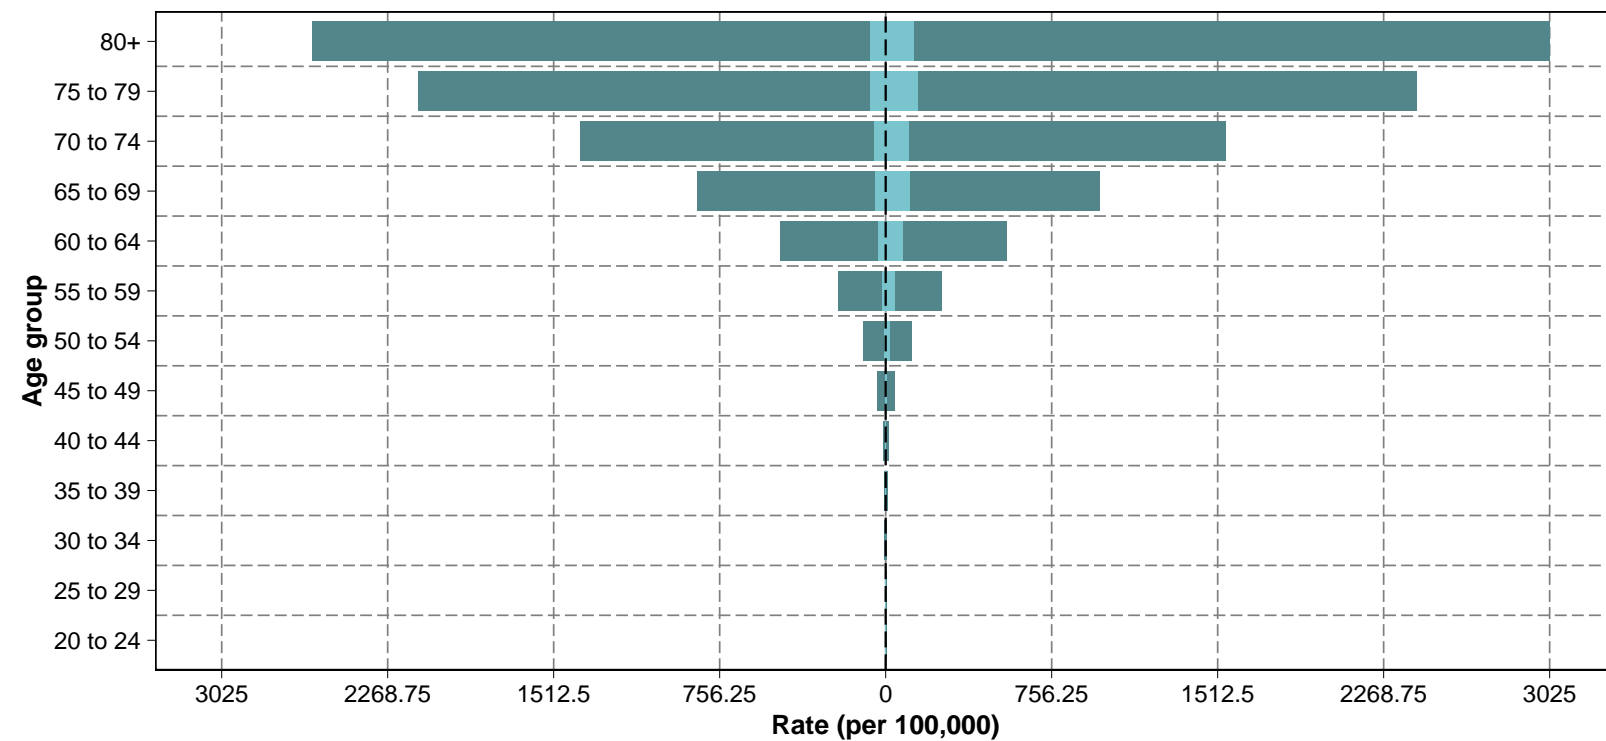

# Iraq

**Incidence**  
1990 2019

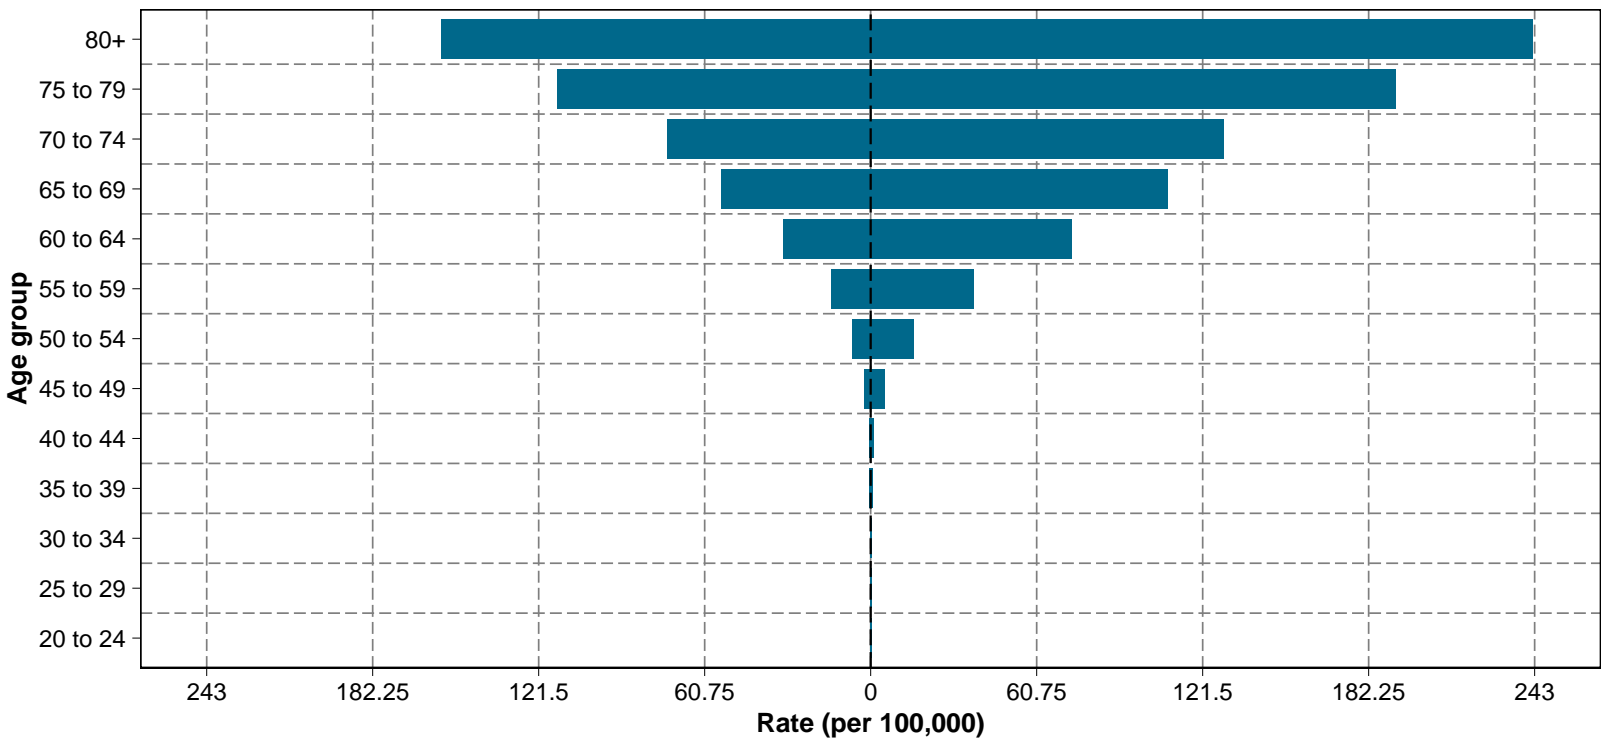

**Prevalence**  
1990 2019

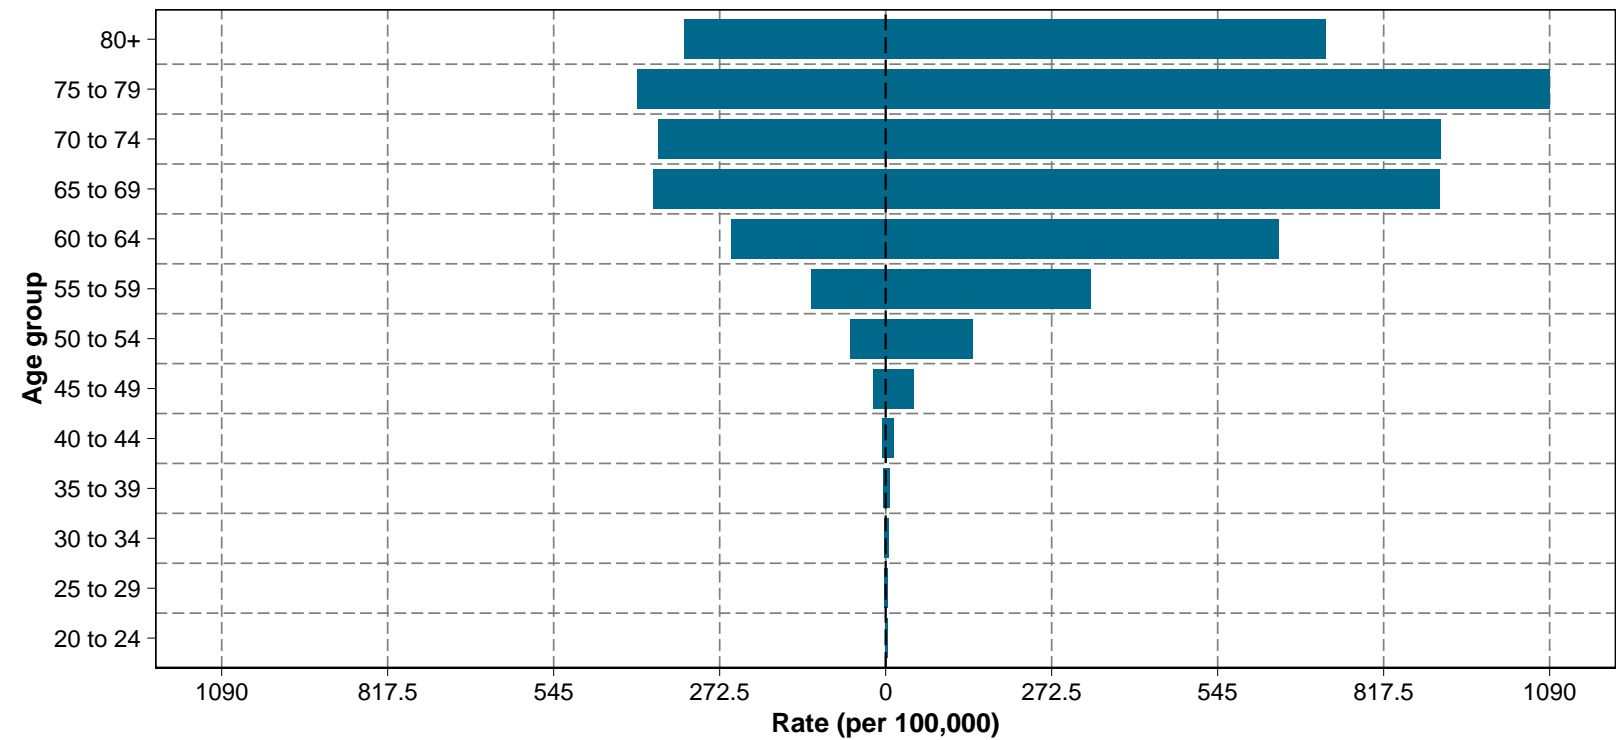

**Deaths**  
1990 2019

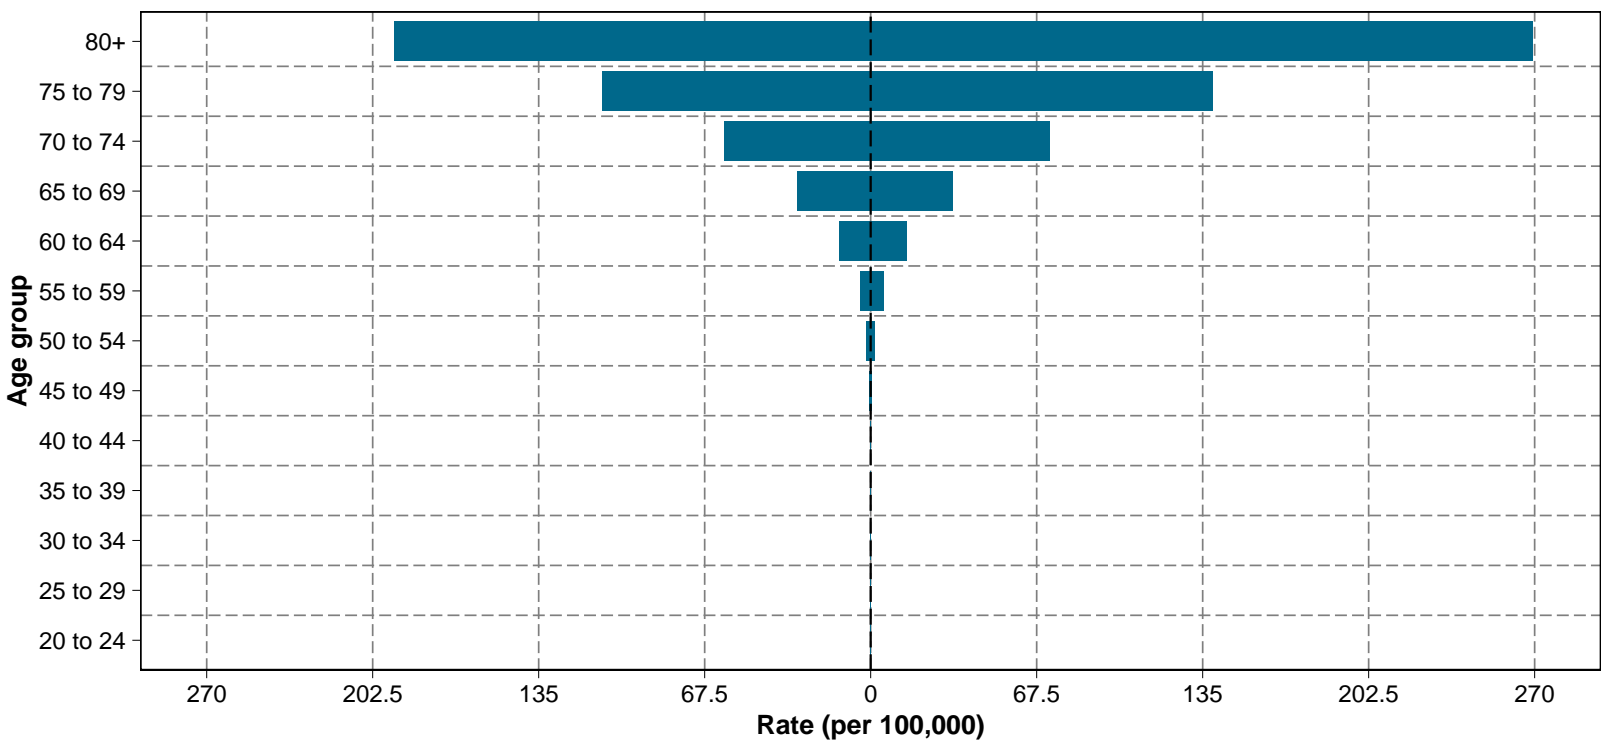

**DALYs**  
1990 2019

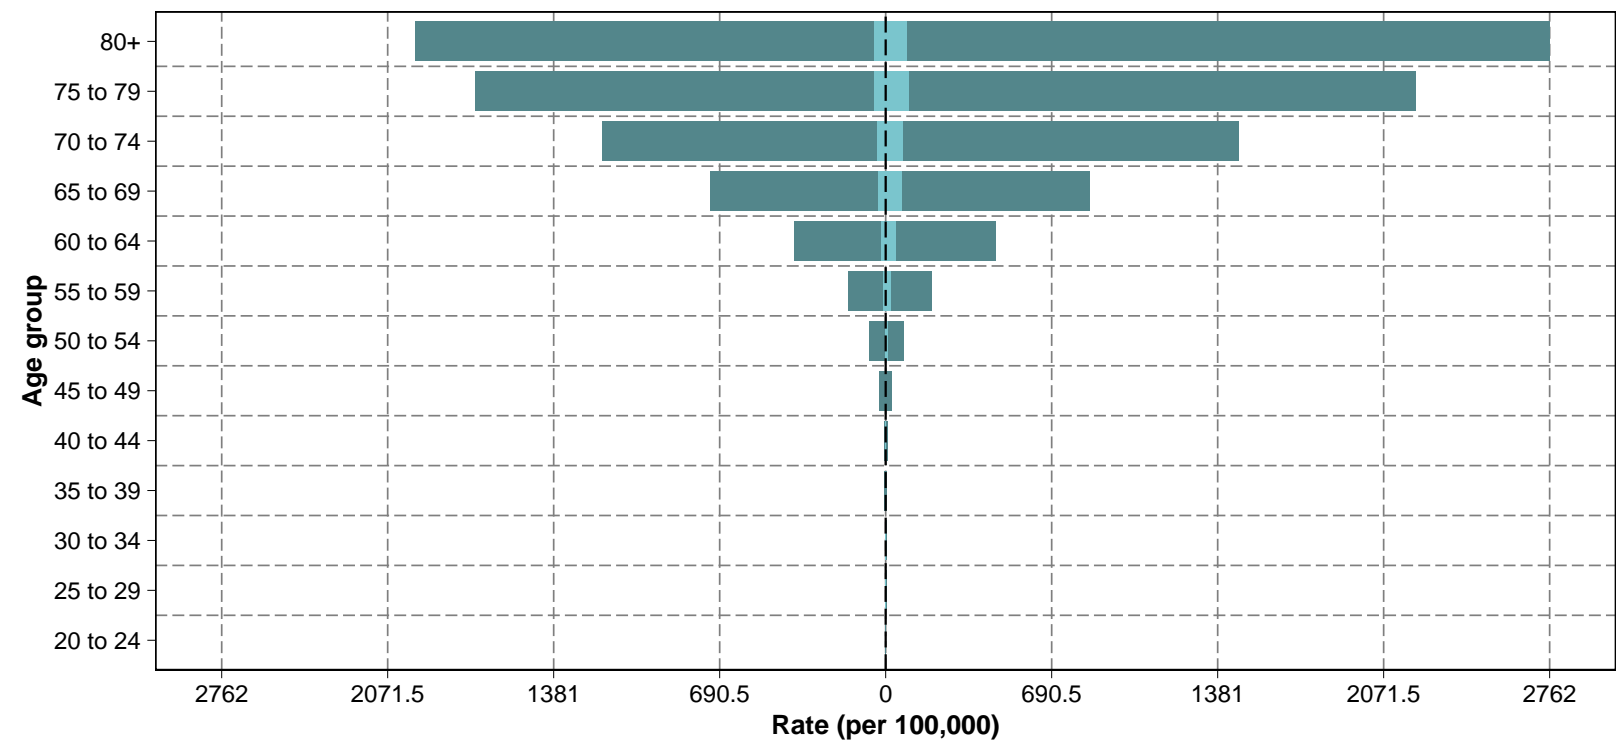

# Jordan

**Incidence**  
1990 2019

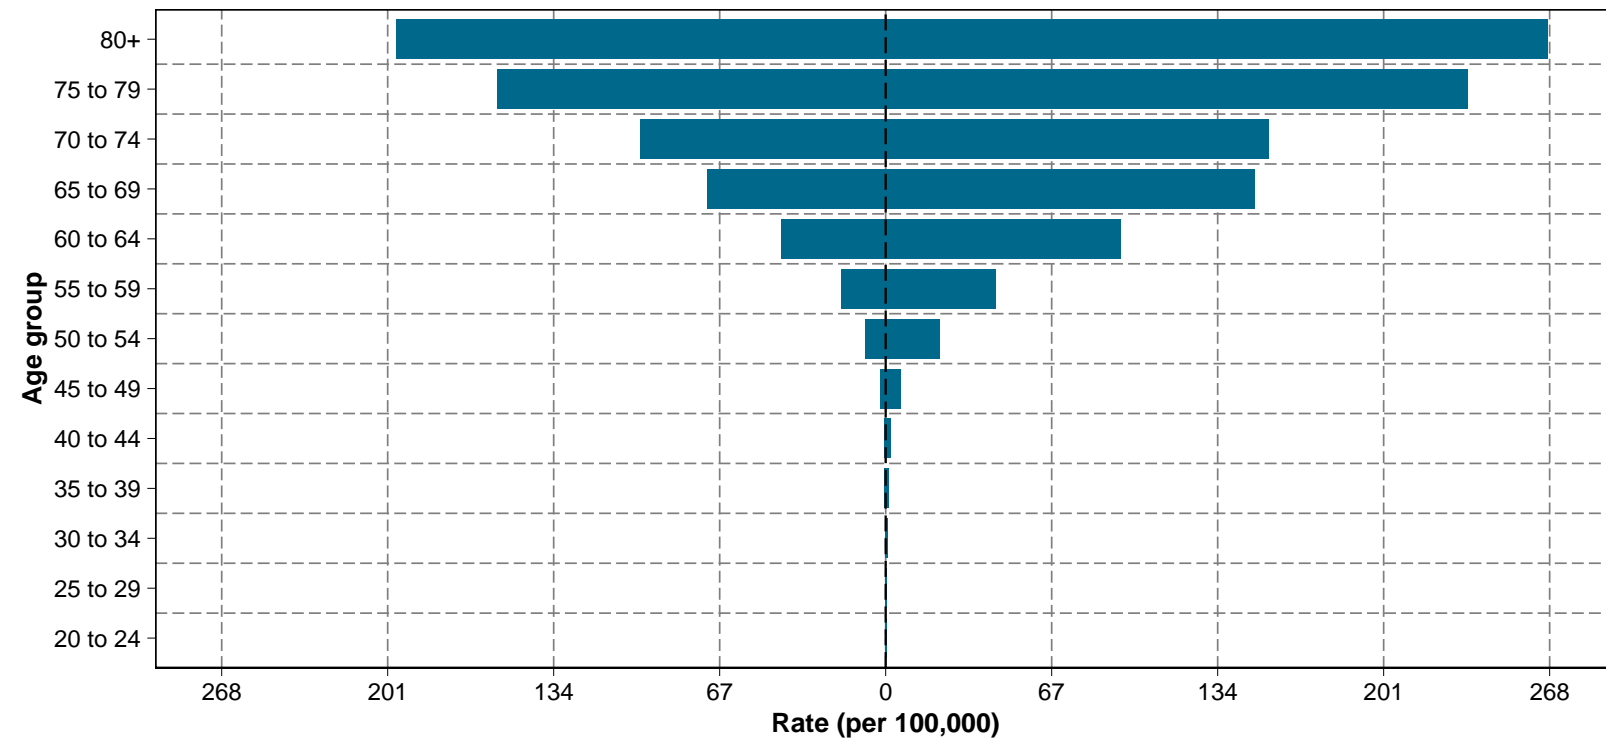

**Prevalence**  
1990 2019

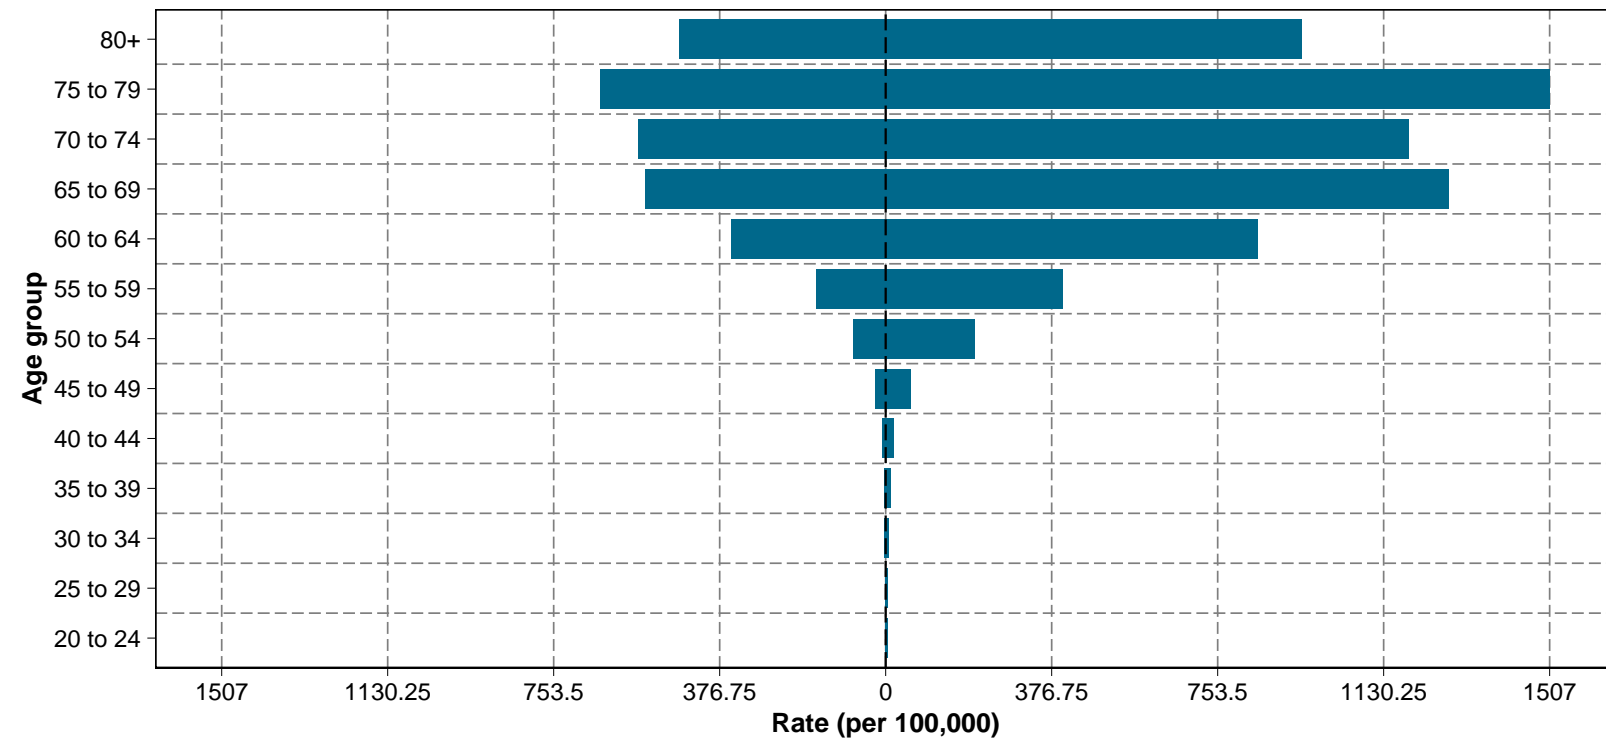

**Deaths**  
1990 2019

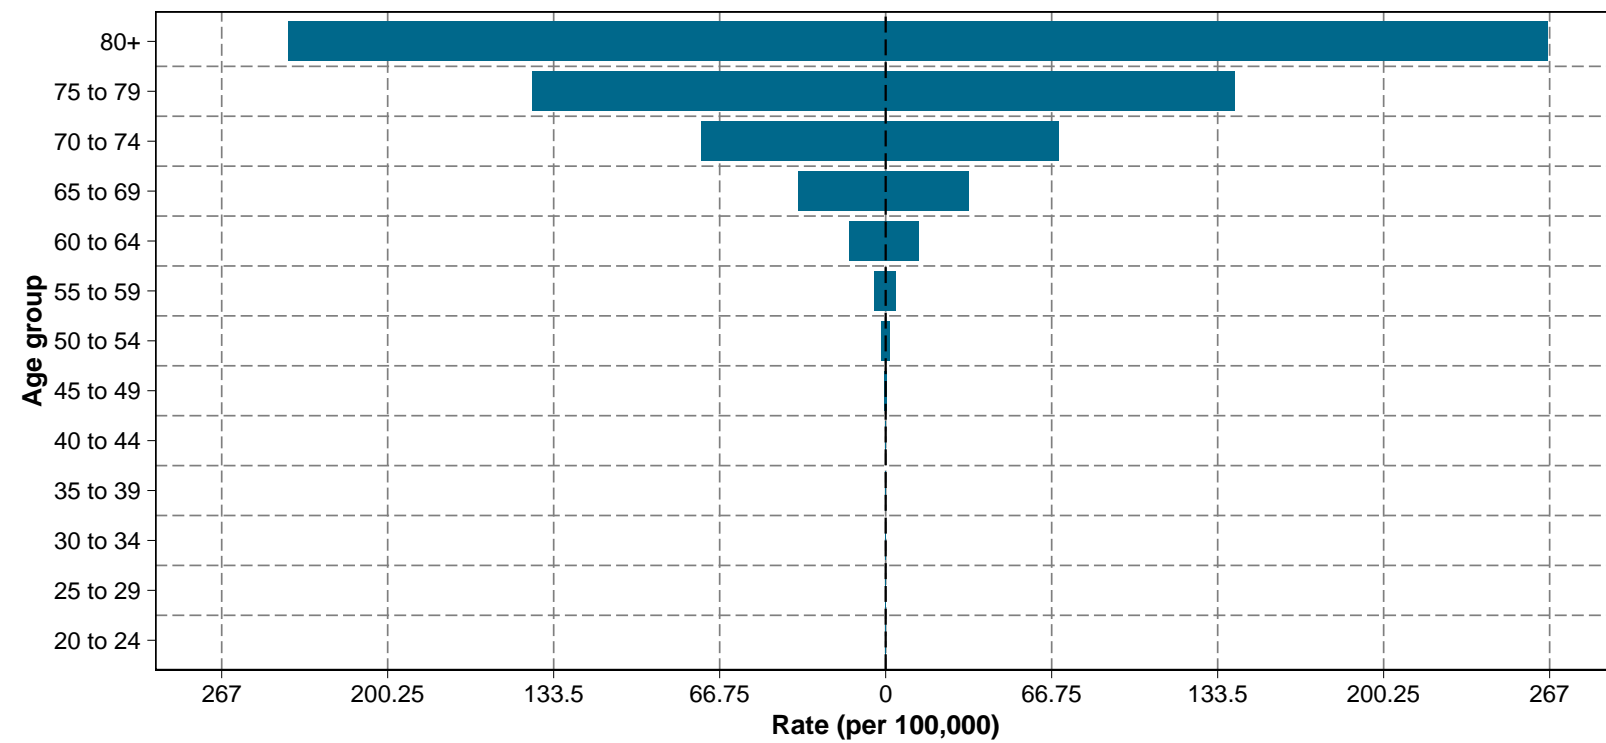

**DALYs**  
1990 2019

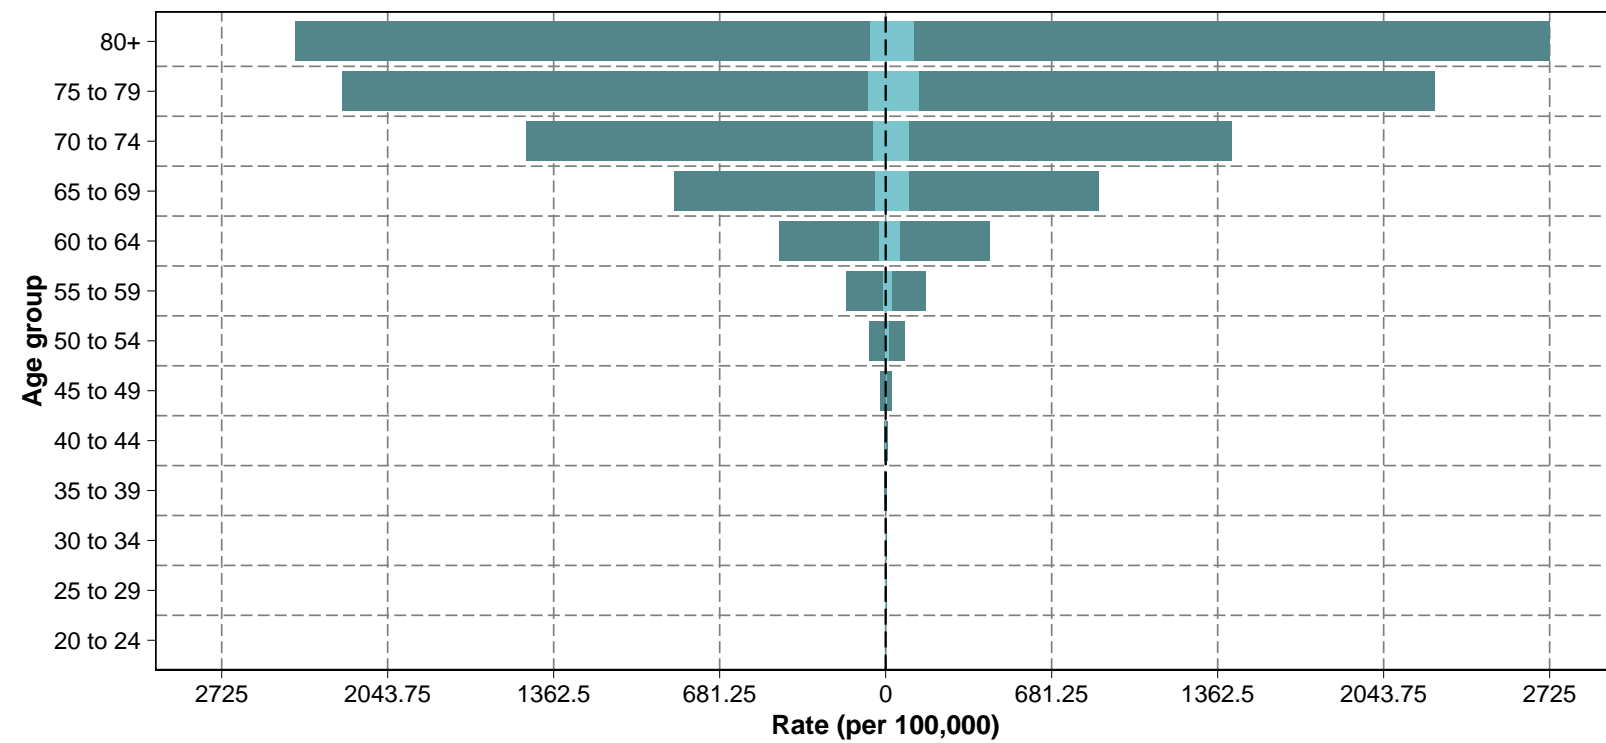

# Kuwait

**Incidence**  
1990 2019

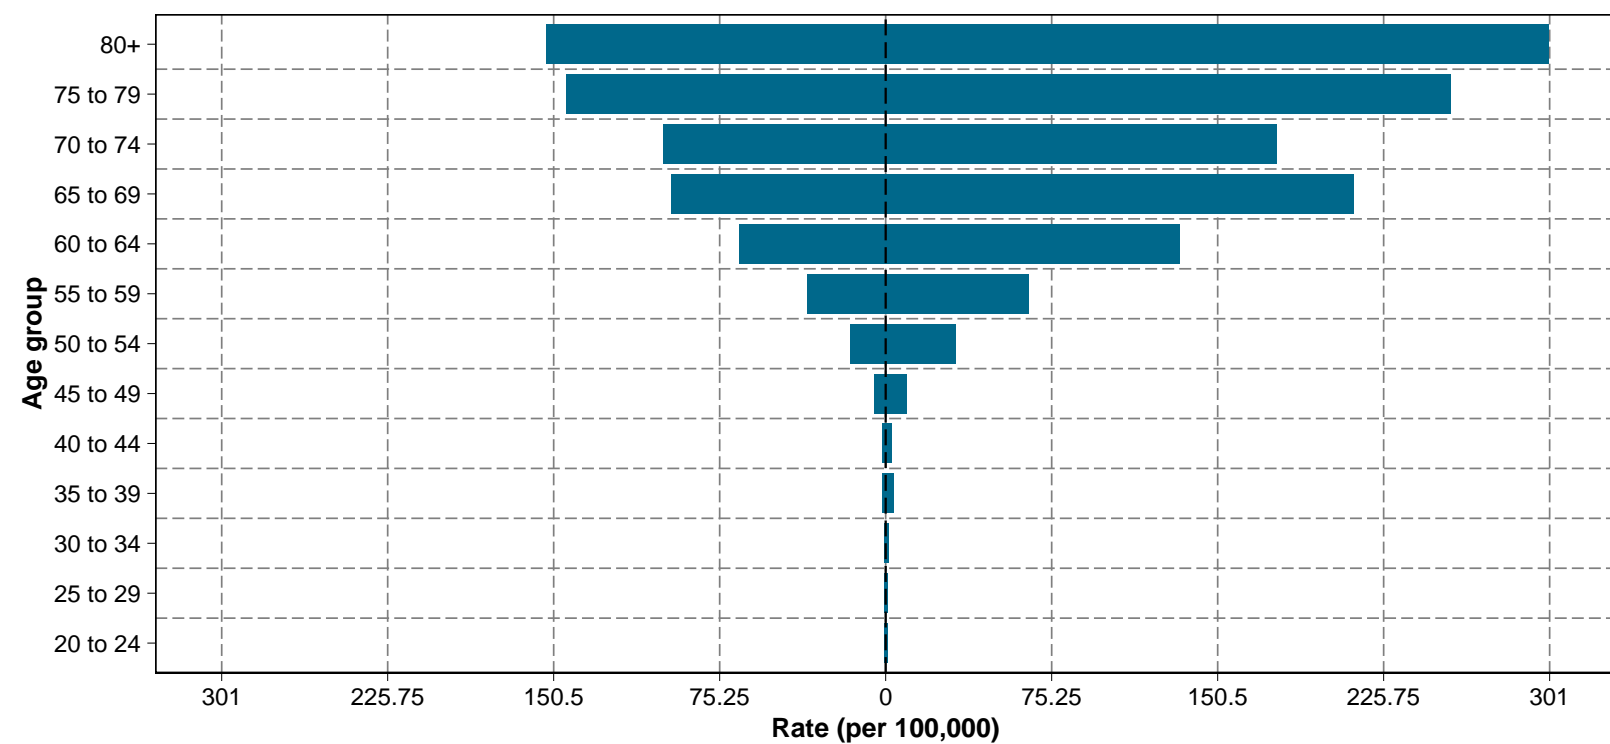

**Prevalence**  
1990 2019

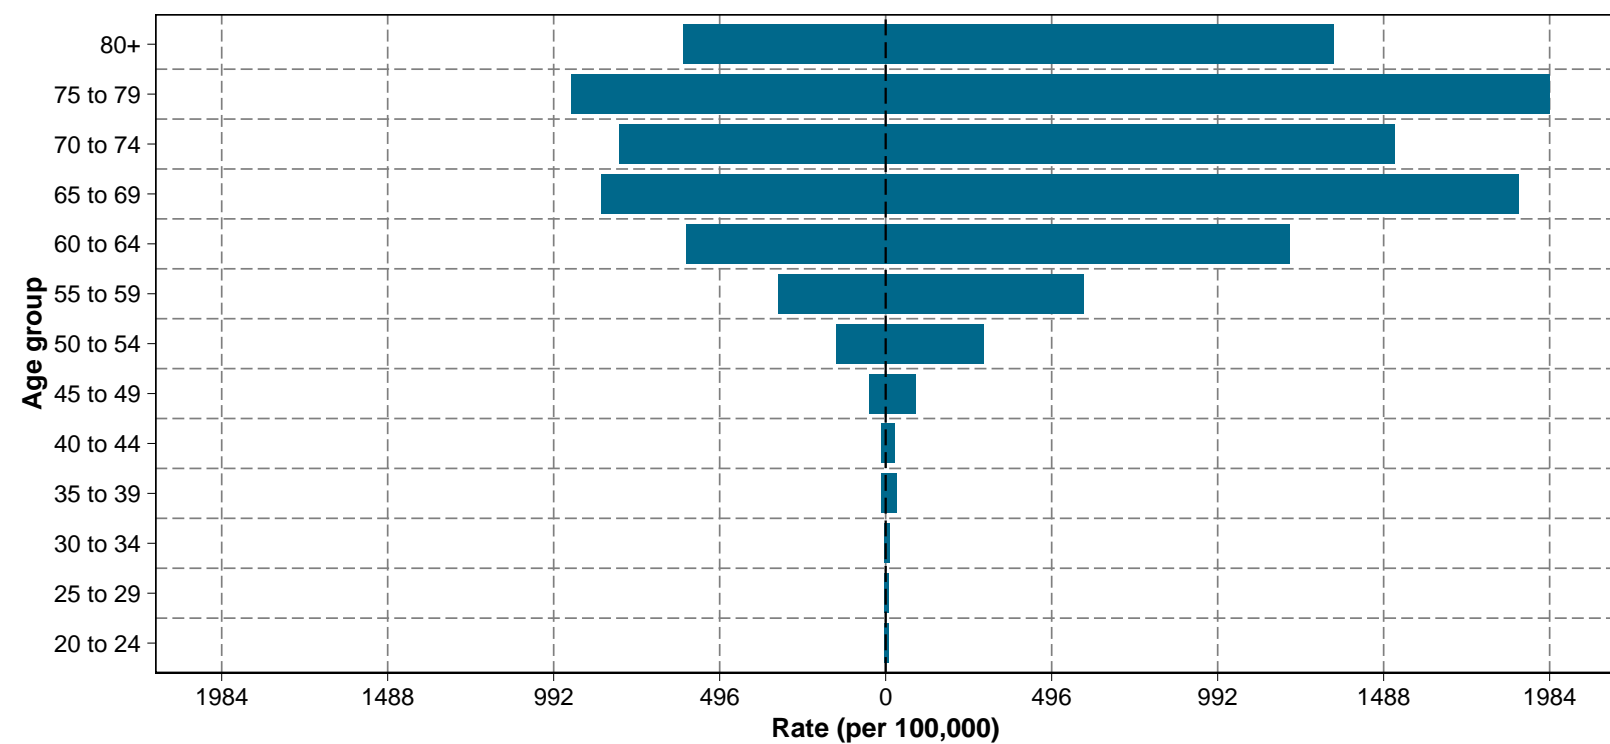

**Deaths**  
1990 2019

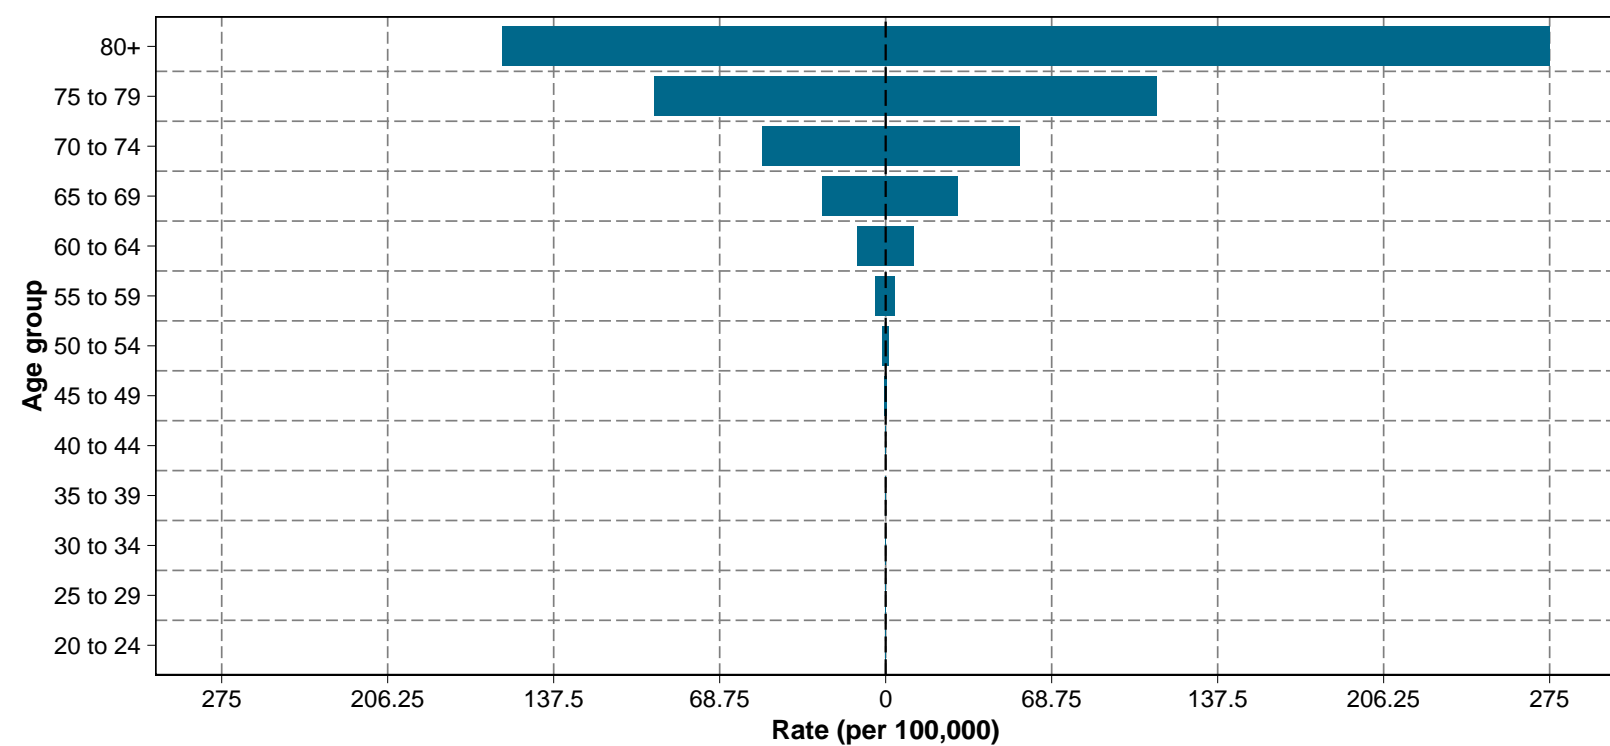

**DALYs**  
1990 2019

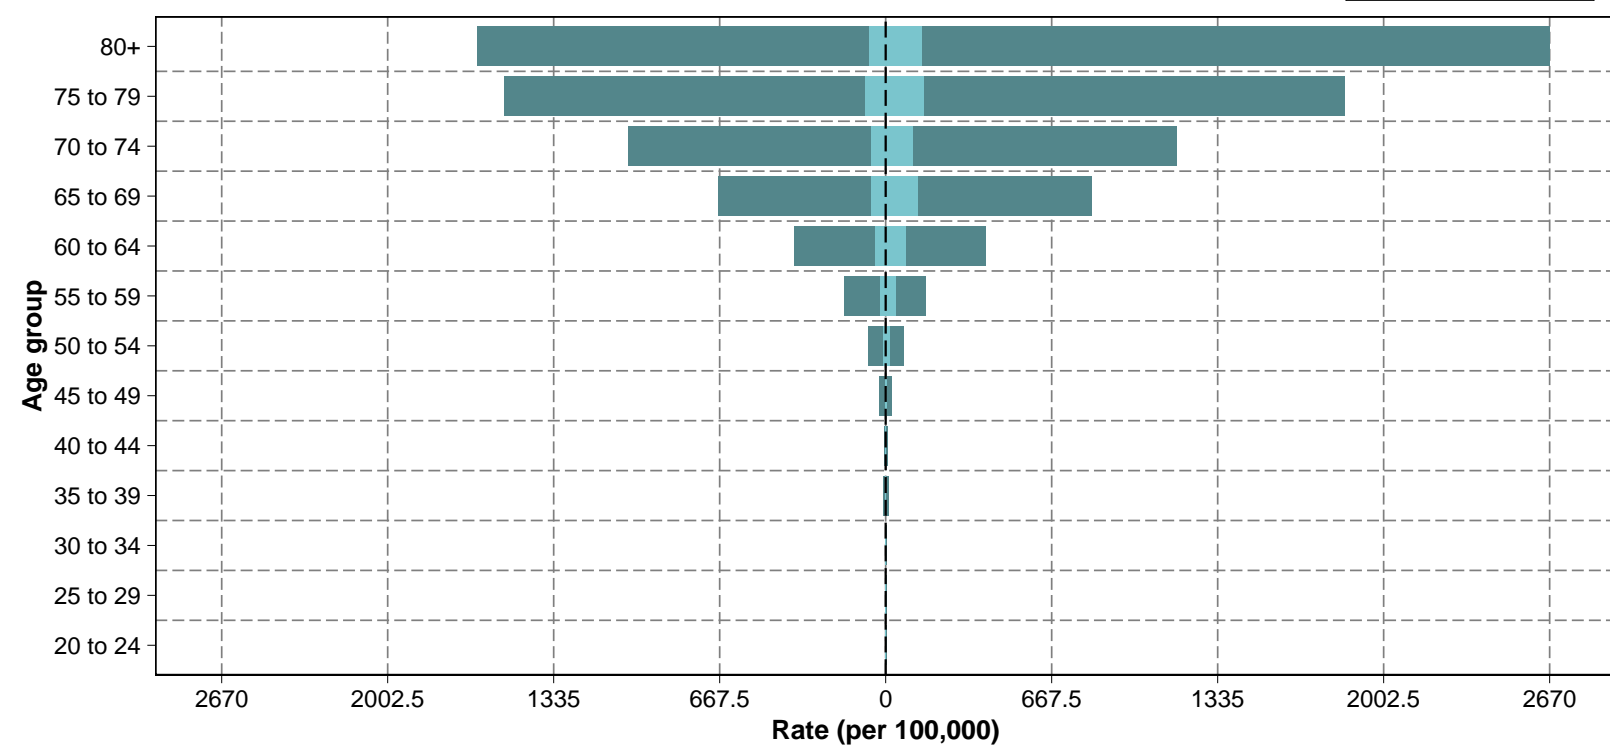

# Lebanon

**Incidence**  
1990 2019

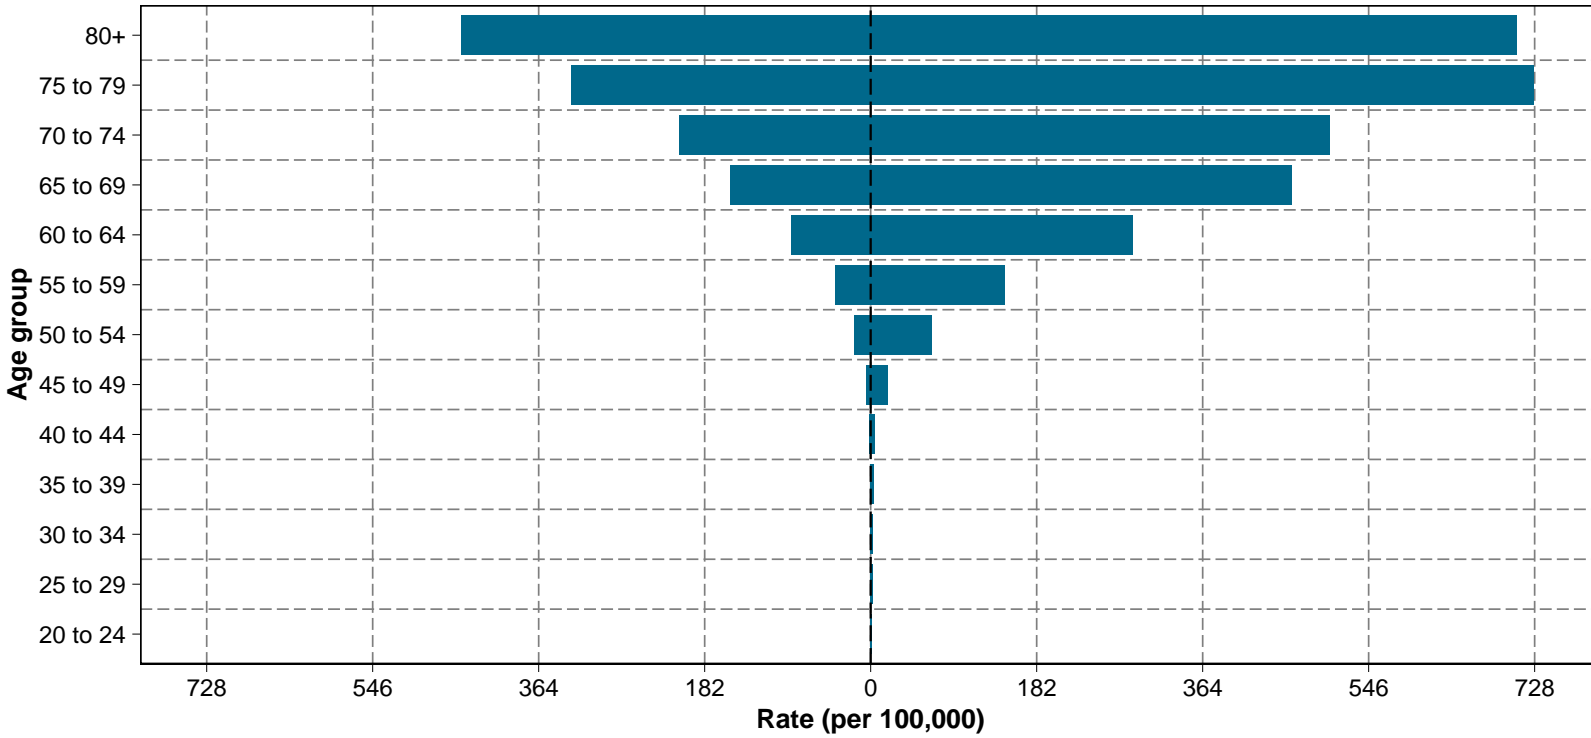

**Prevalence**  
1990 2019

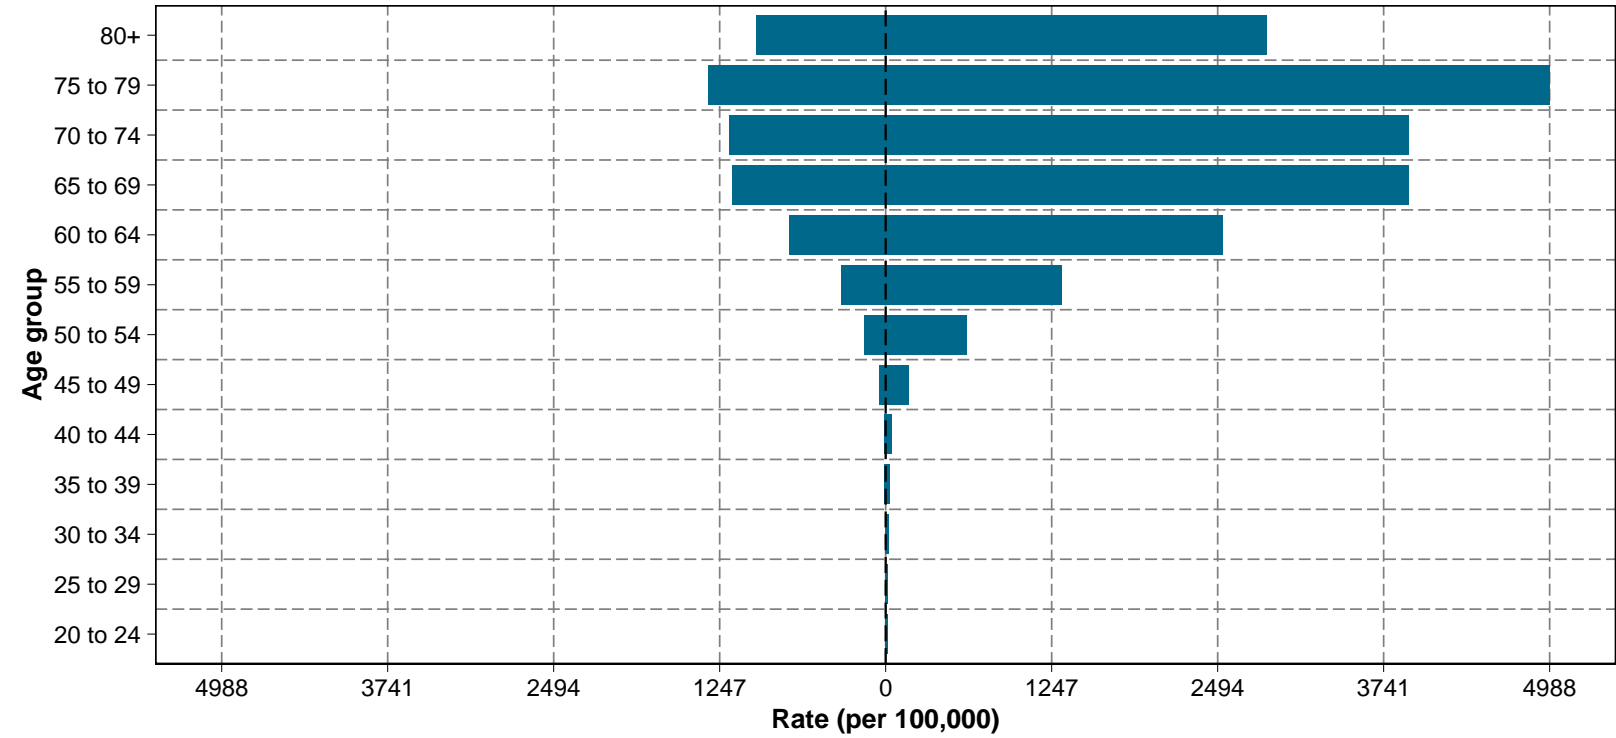

**Deaths**  
1990 2019

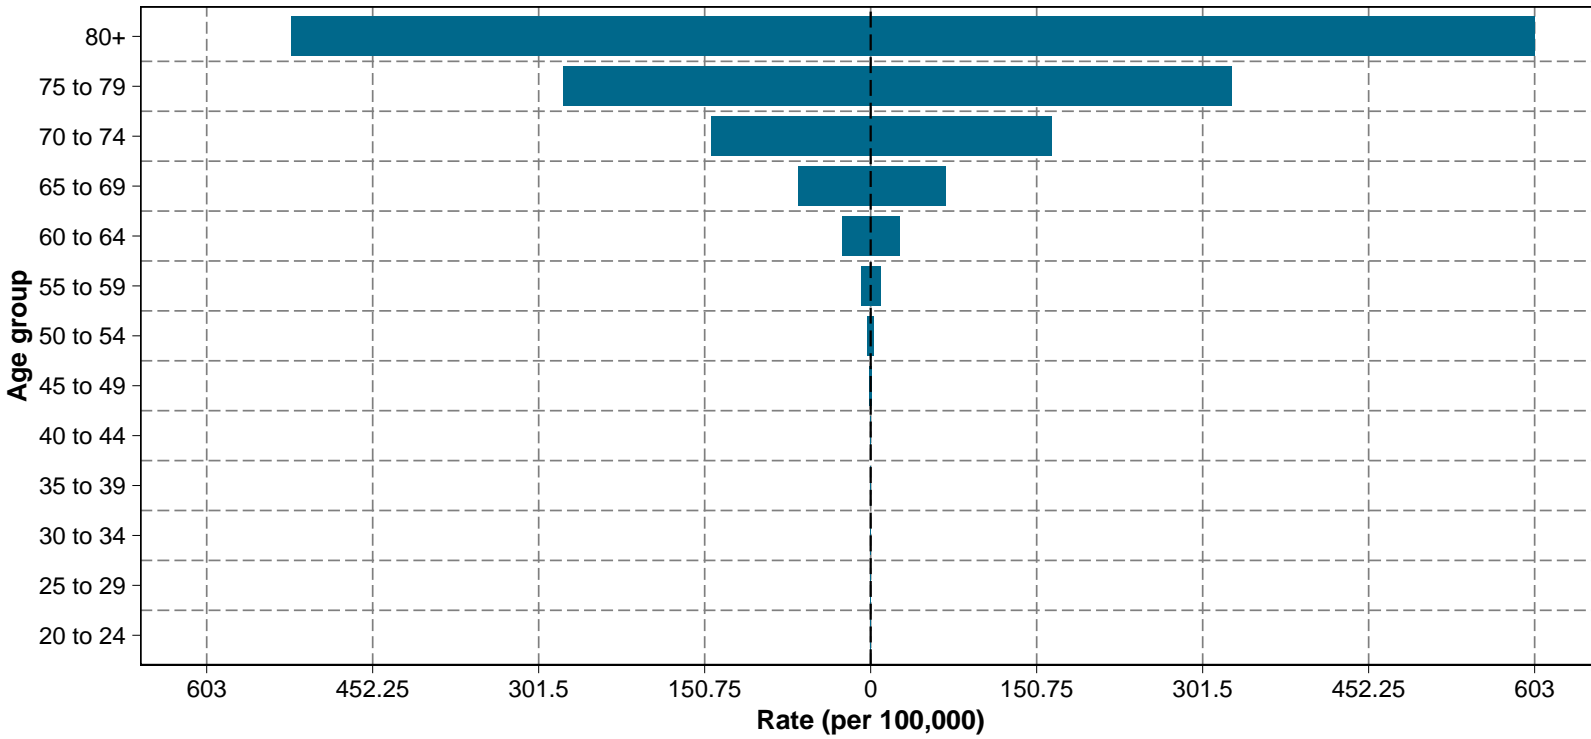

**DALYs**  
1990 2019

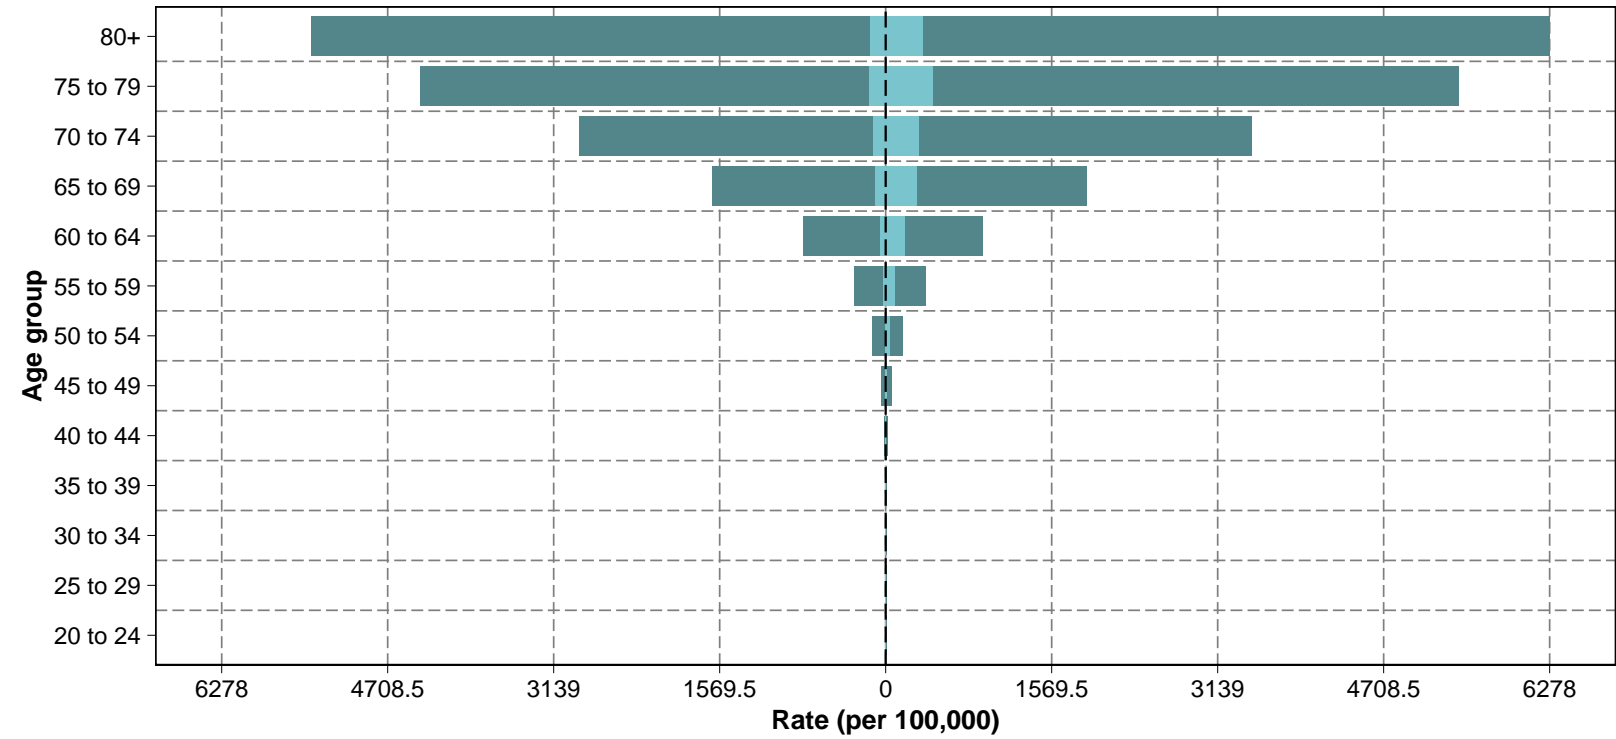



# Libya

**Incidence**  
1990 2019

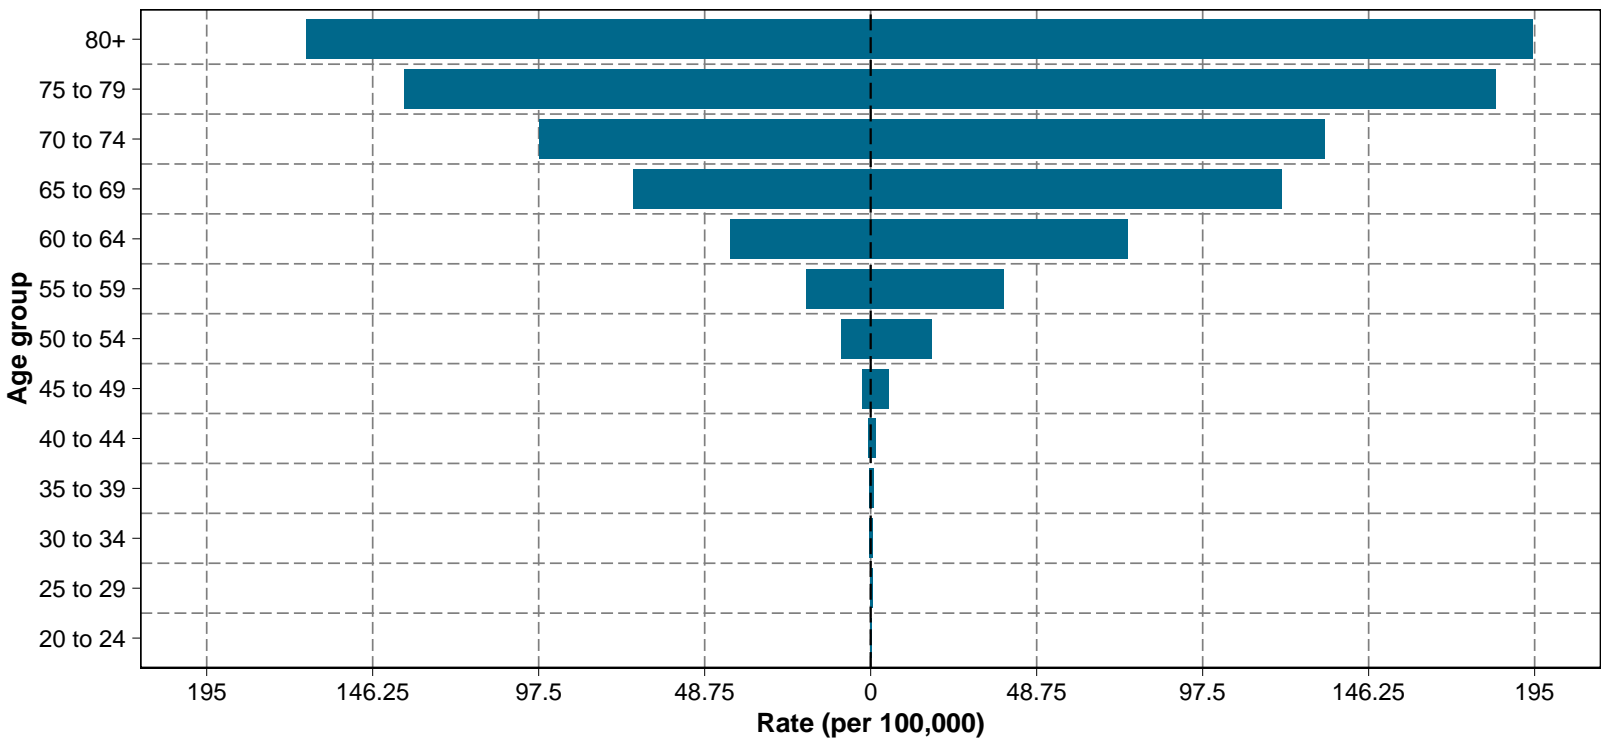

**Prevalence**  
1990 2019

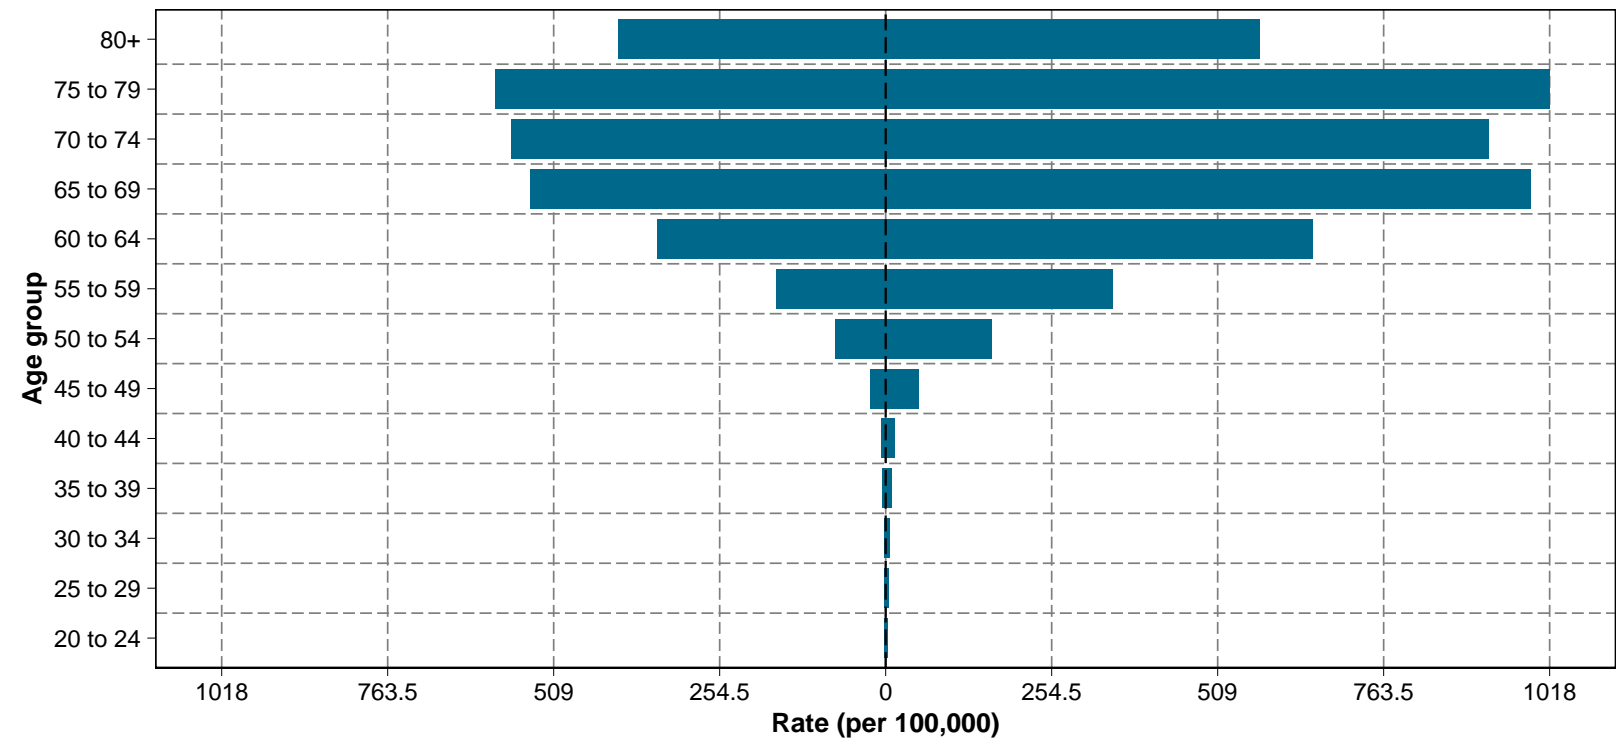

**Deaths**  
1990 2019

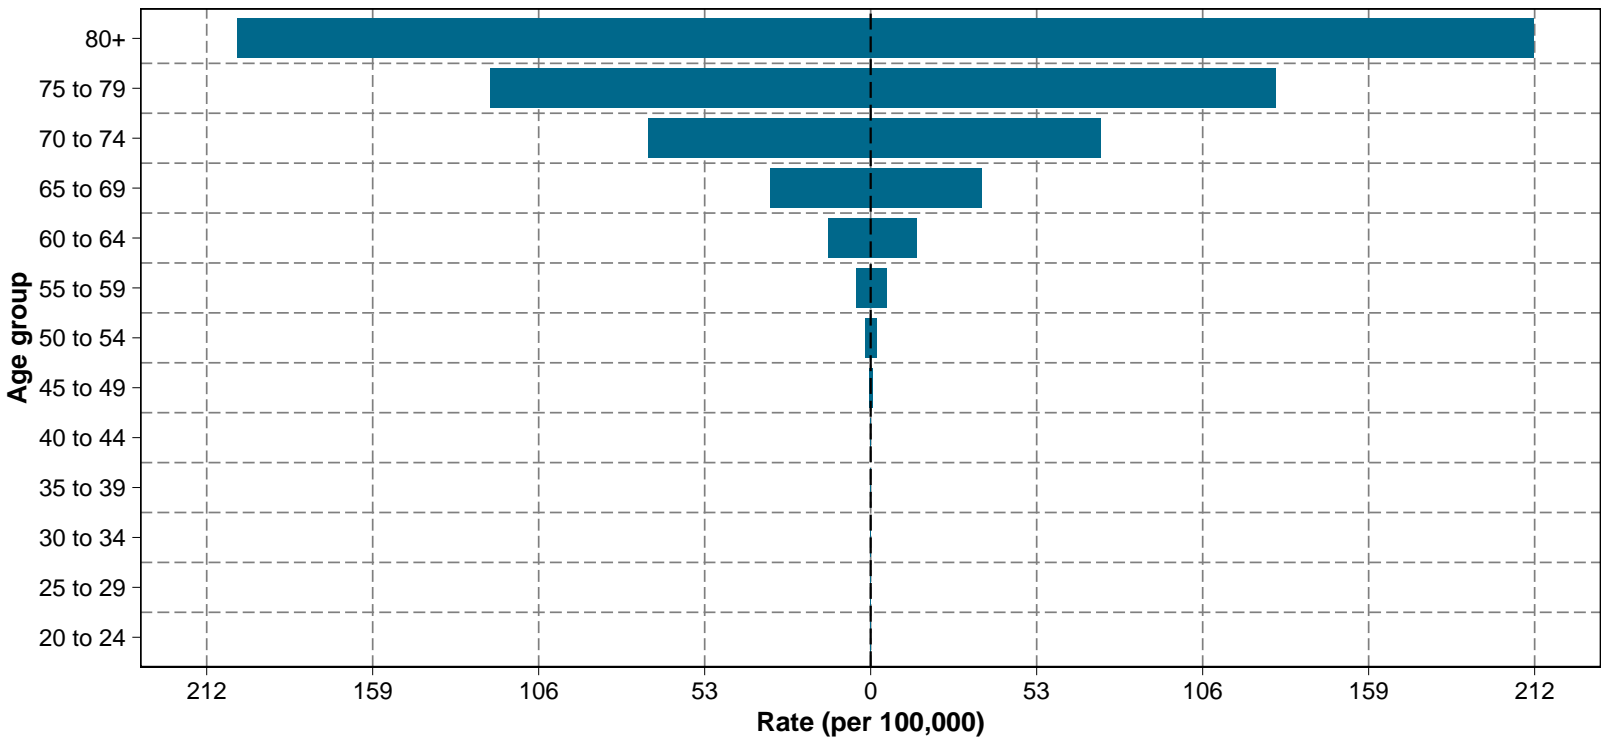

**DALYs**  
1990 2019

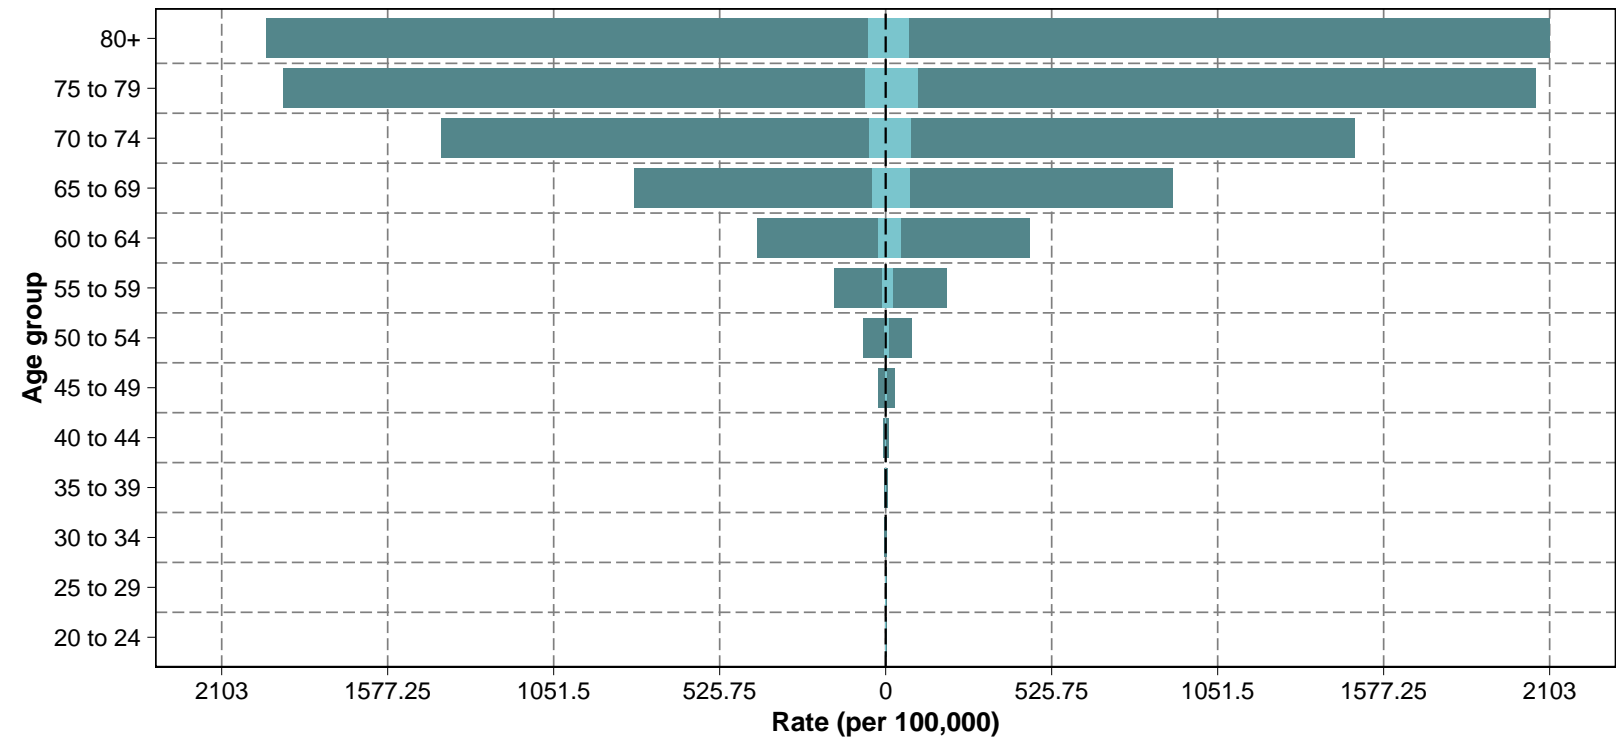

# Morocco

**Incidence**  
1990 2019

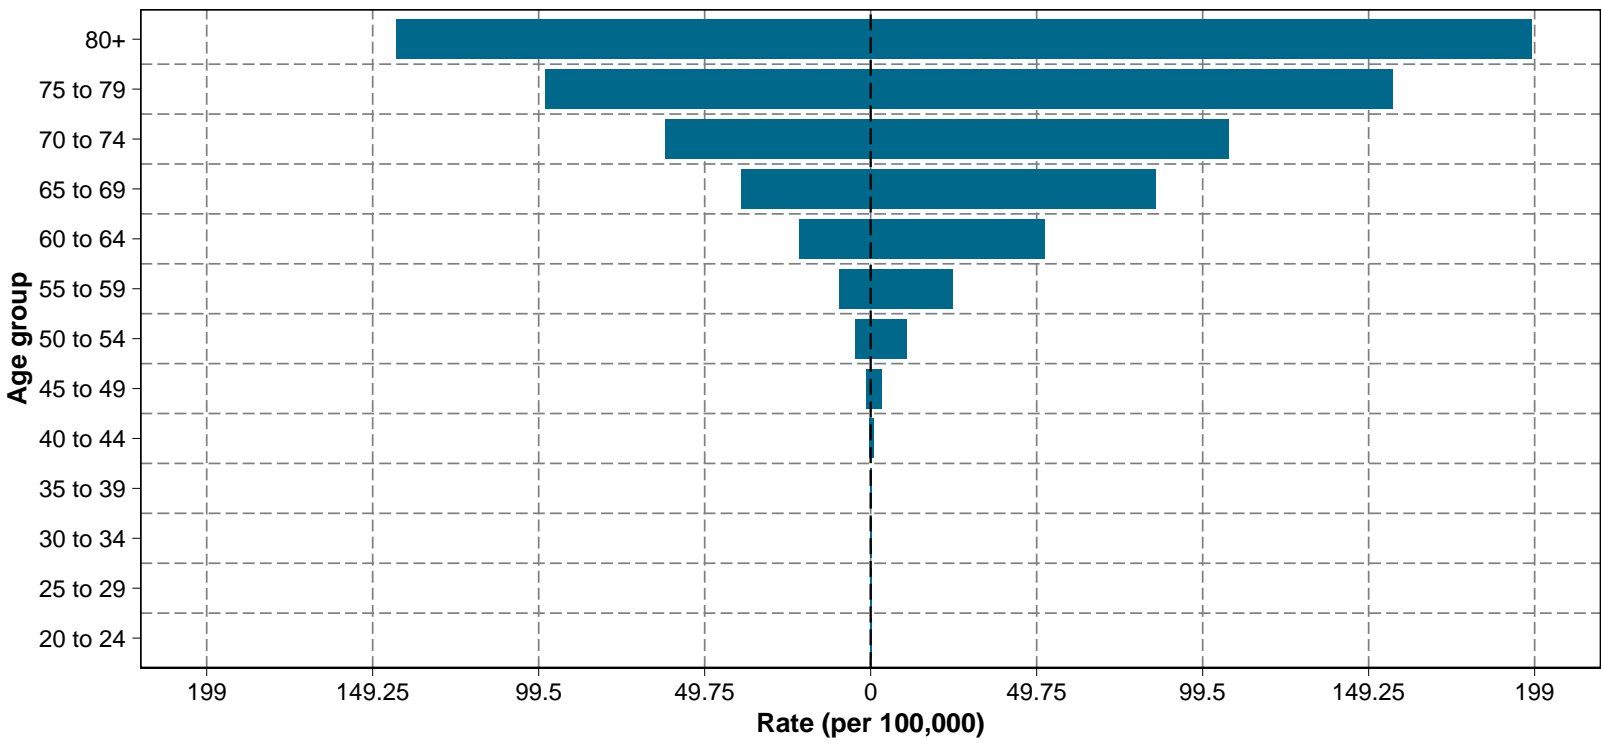

**Prevalence**  
1990 2019

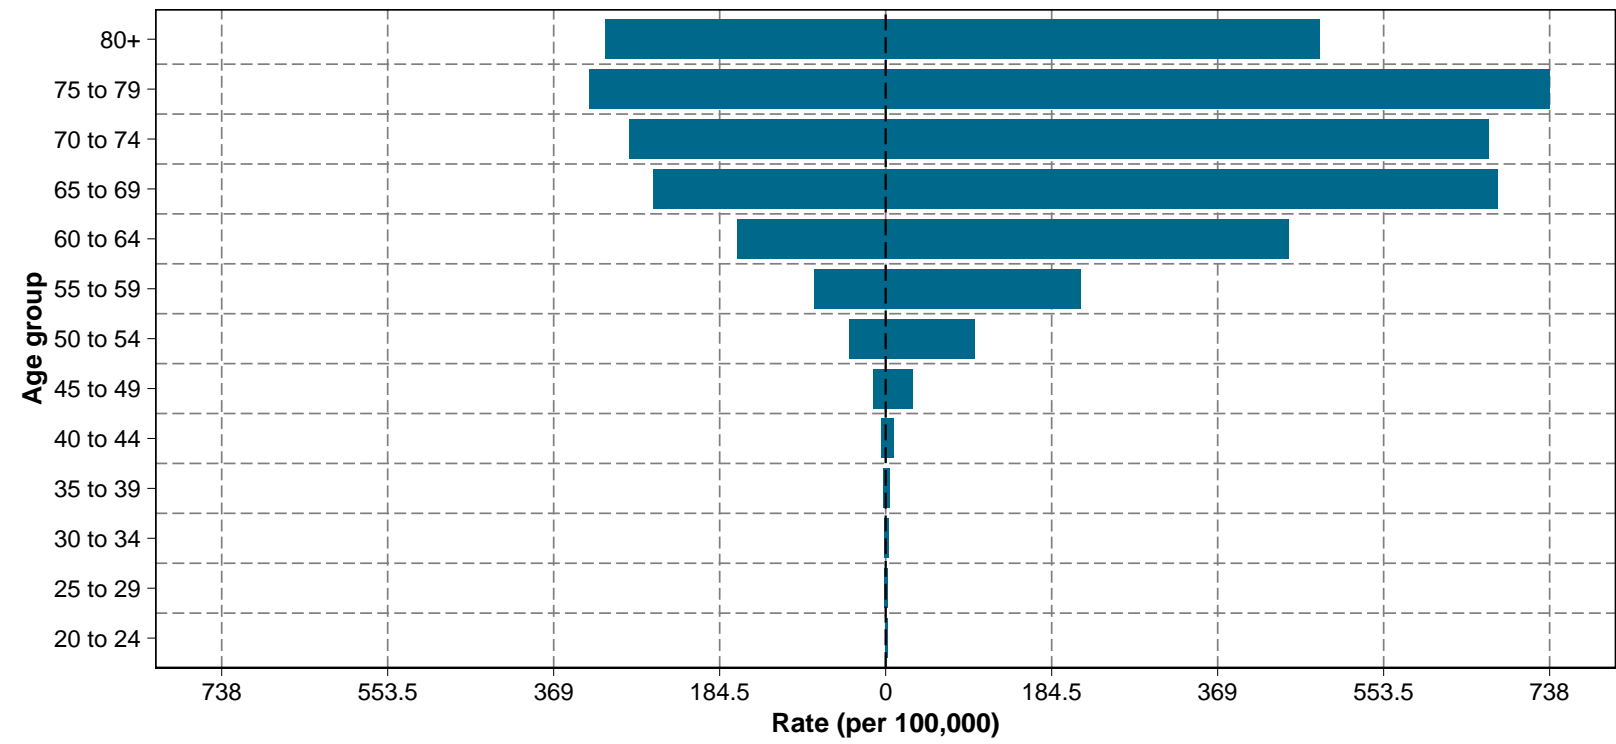

**Deaths**  
1990 2019

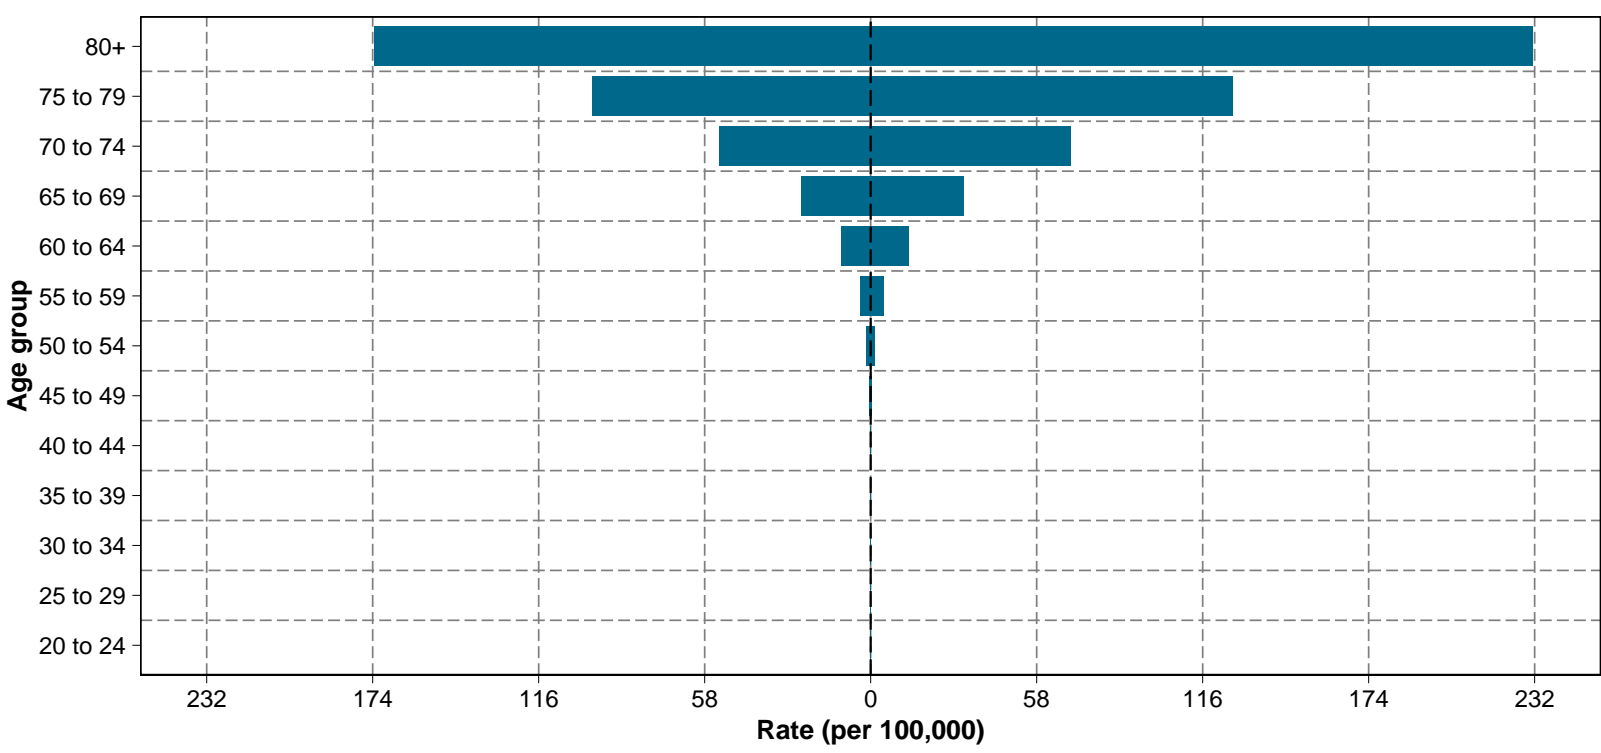

**DALYs**  
1990 2019

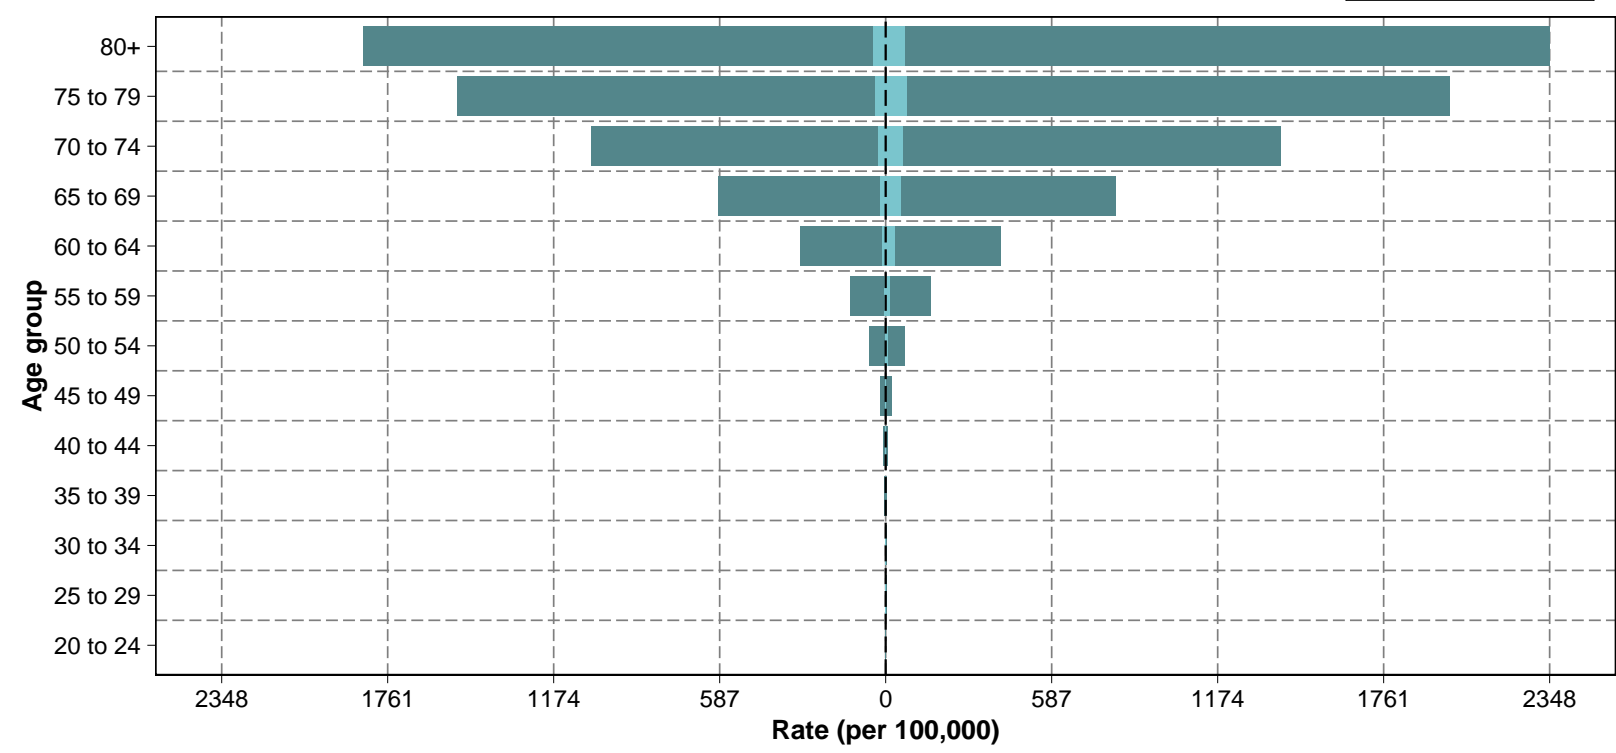

# Oman

**Incidence**  
1990 2019

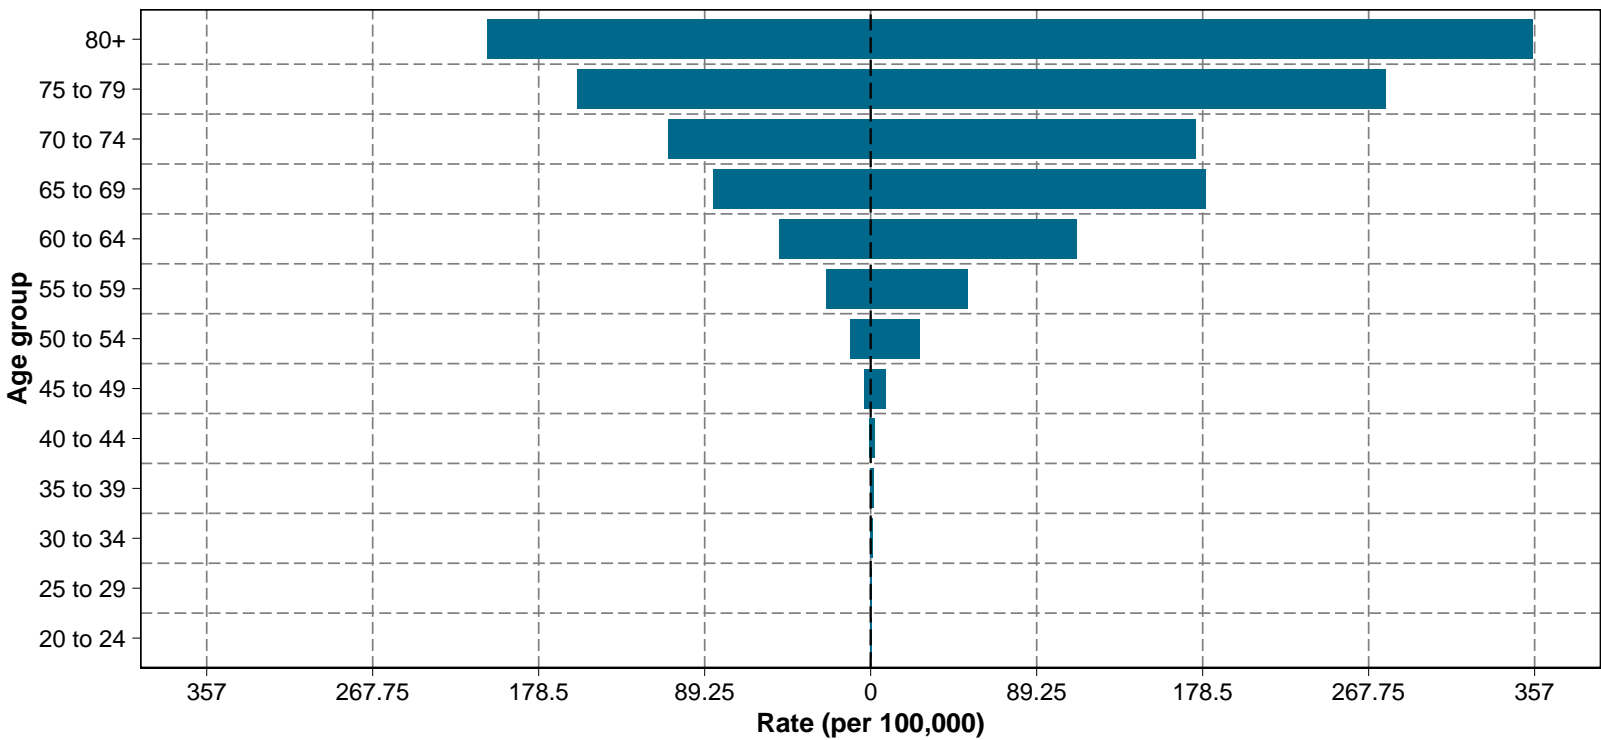

**Prevalence**  
1990 2019

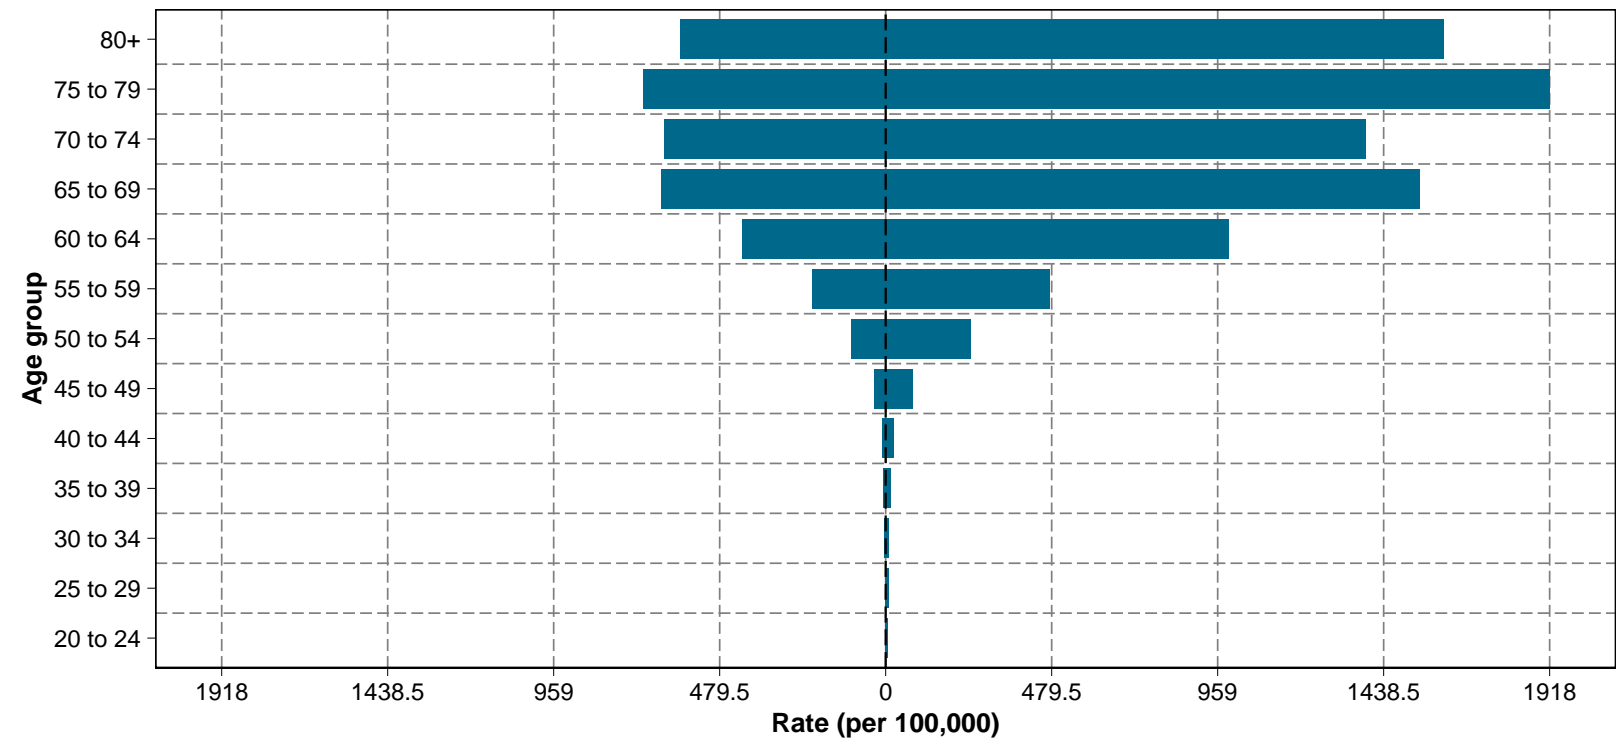

**Deaths**  
1990 2019

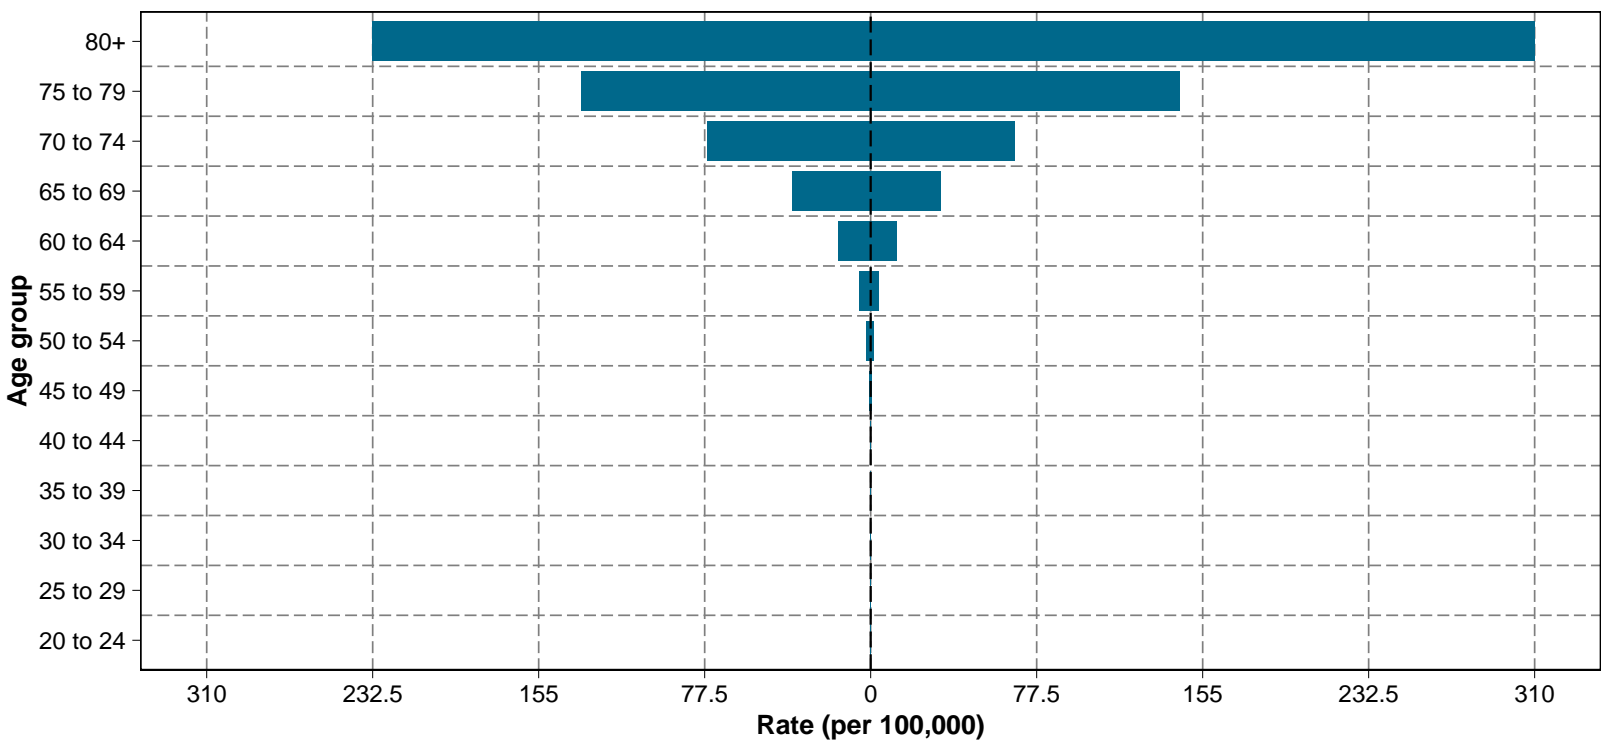

**DALYs**  
1990 2019

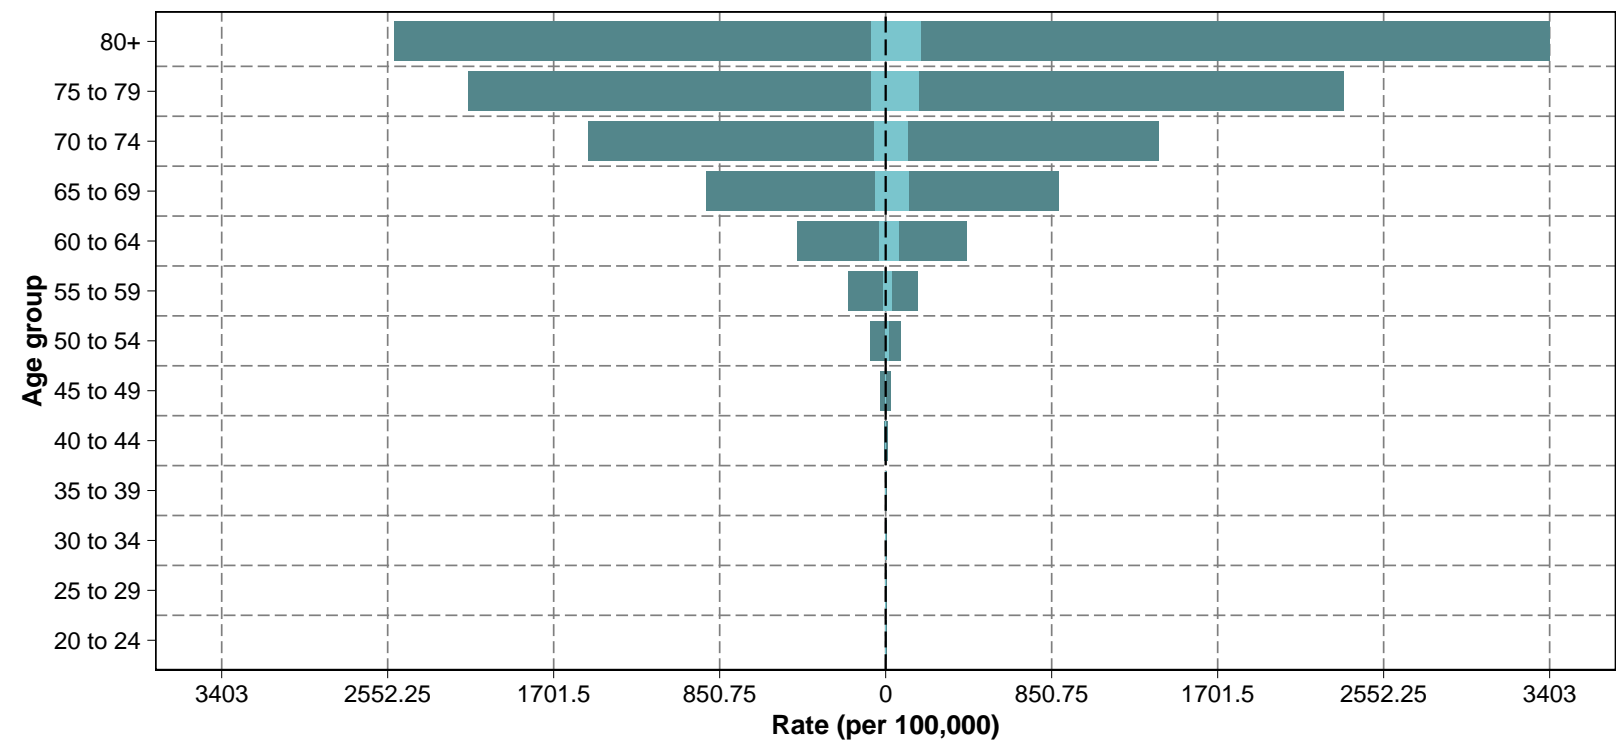

# Palestine

**Incidence**  
1990 2019

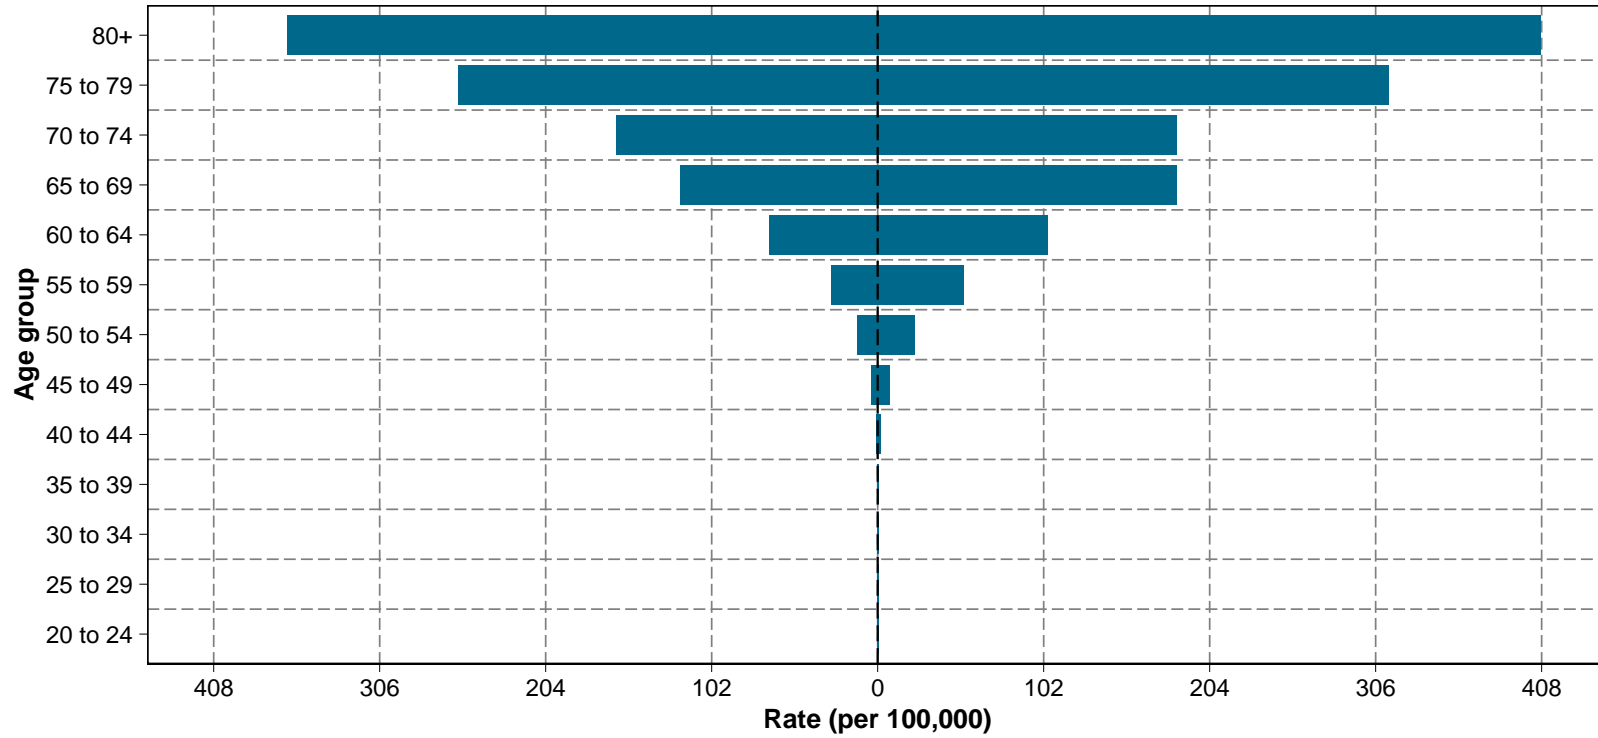

**Prevalence**  
1990 2019

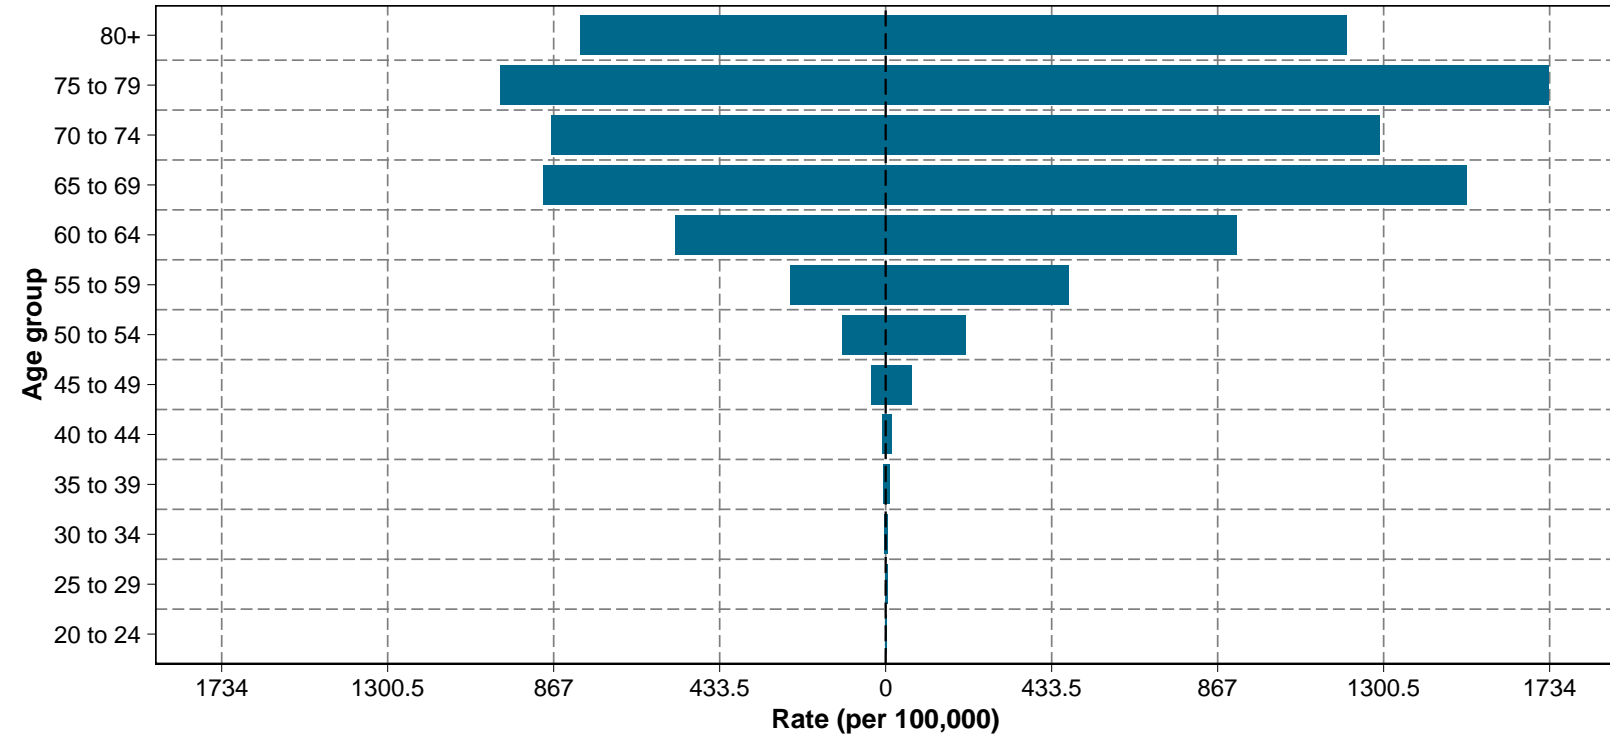

**Deaths**  
1990 2019

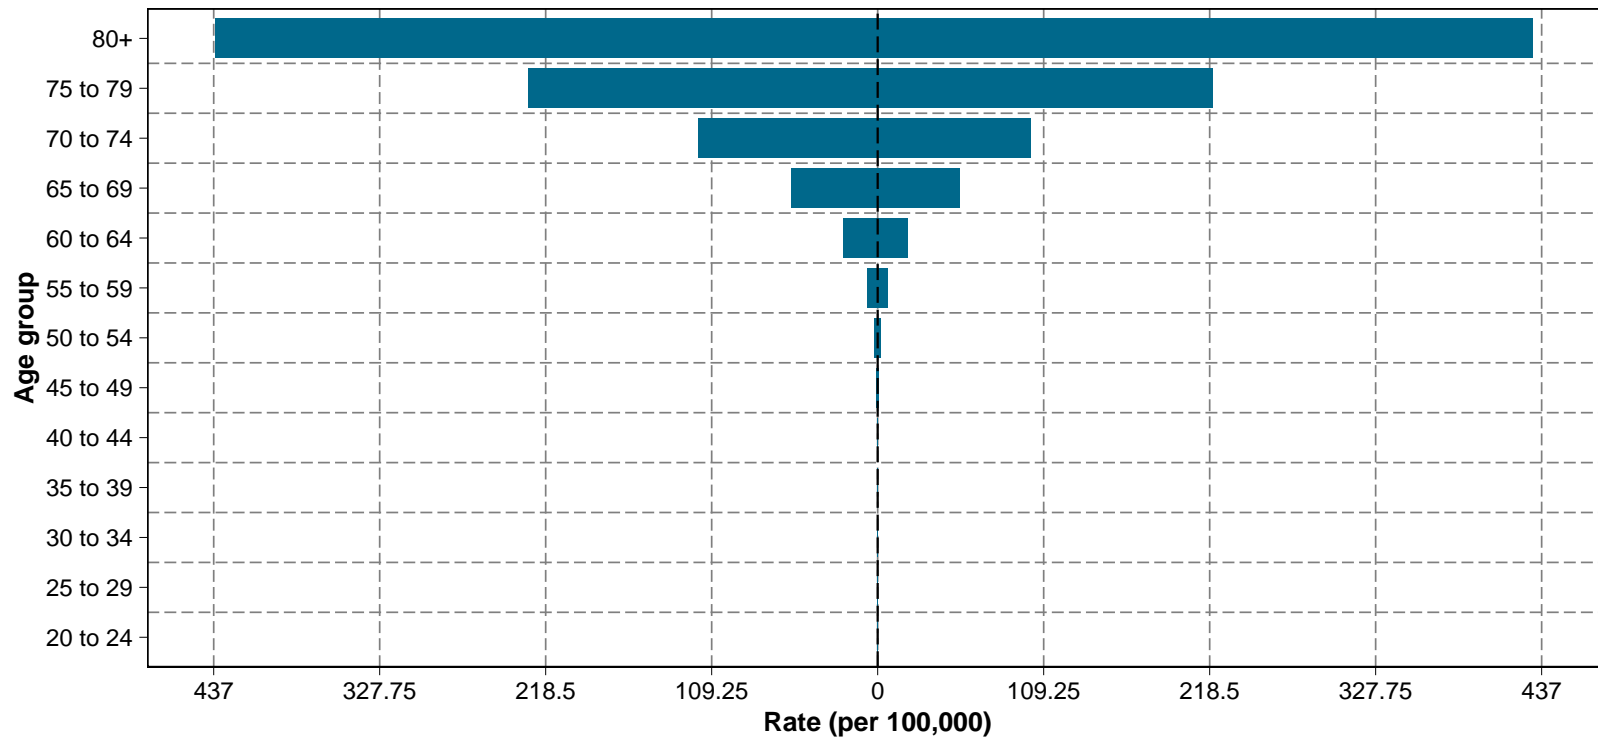

**DALYs**  
1990 2019

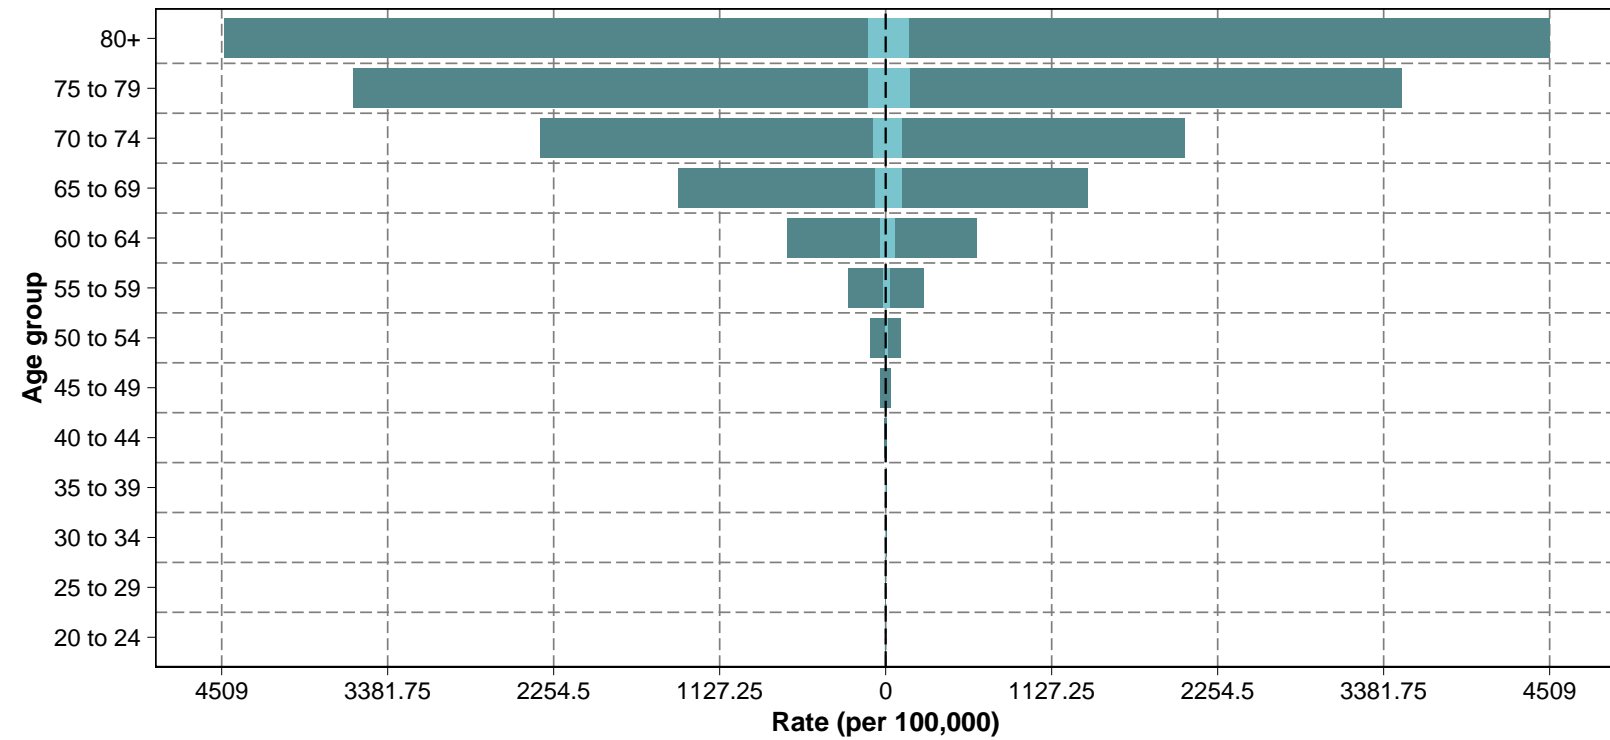

# Qatar

**Incidence**  
1990 2019

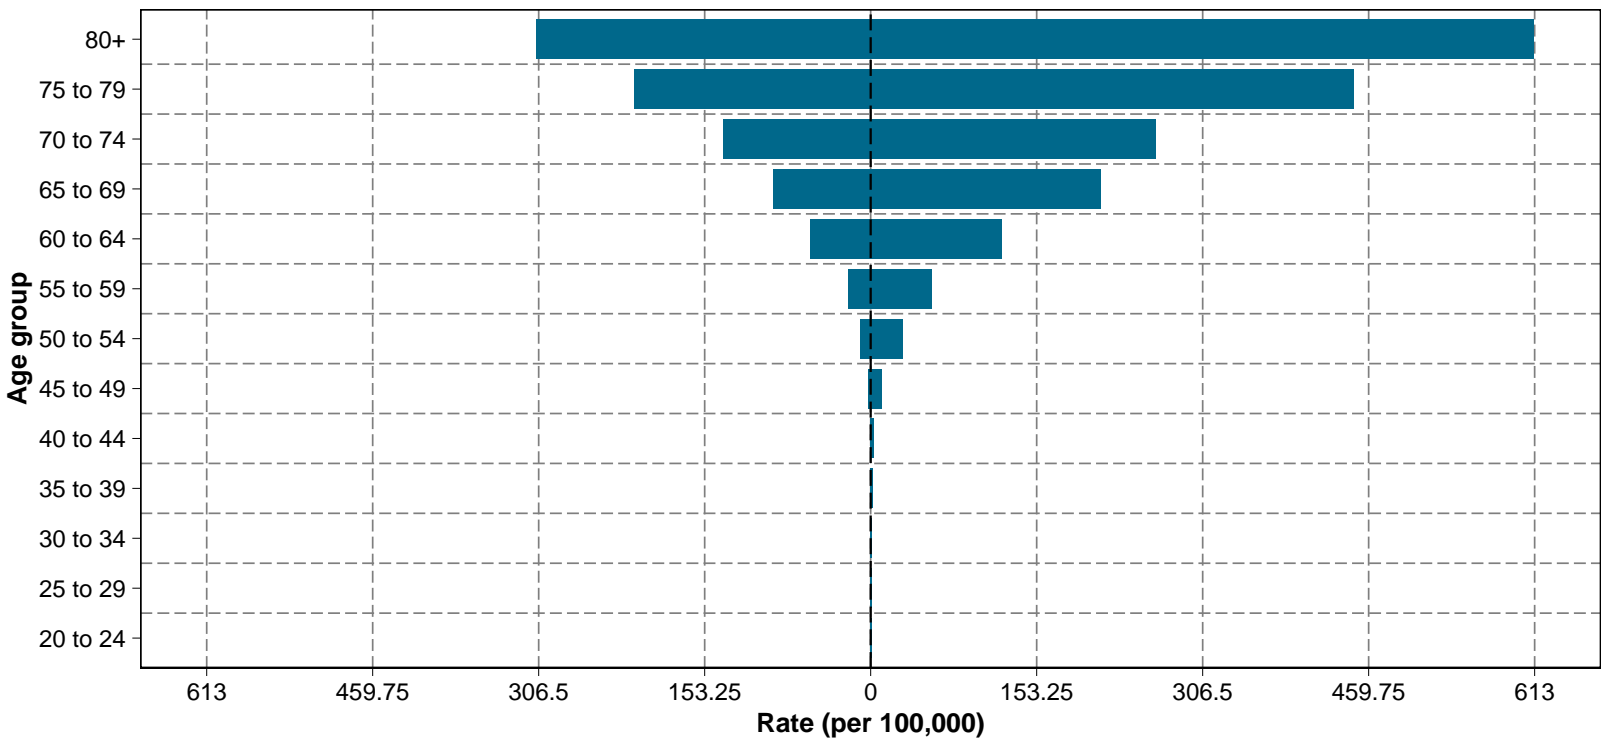

**Prevalence**  
1990 2019

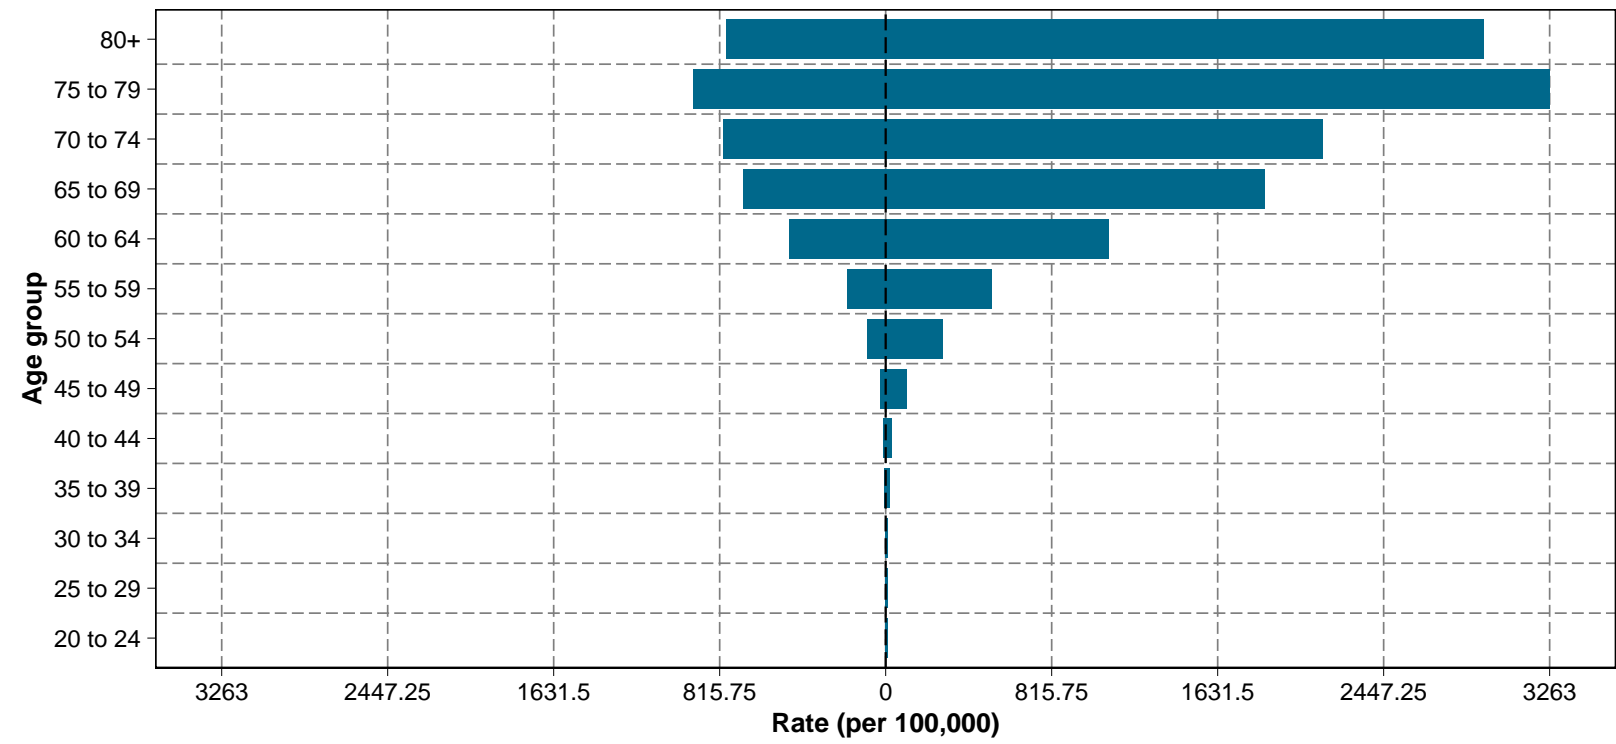

**Deaths**  
1990 2019

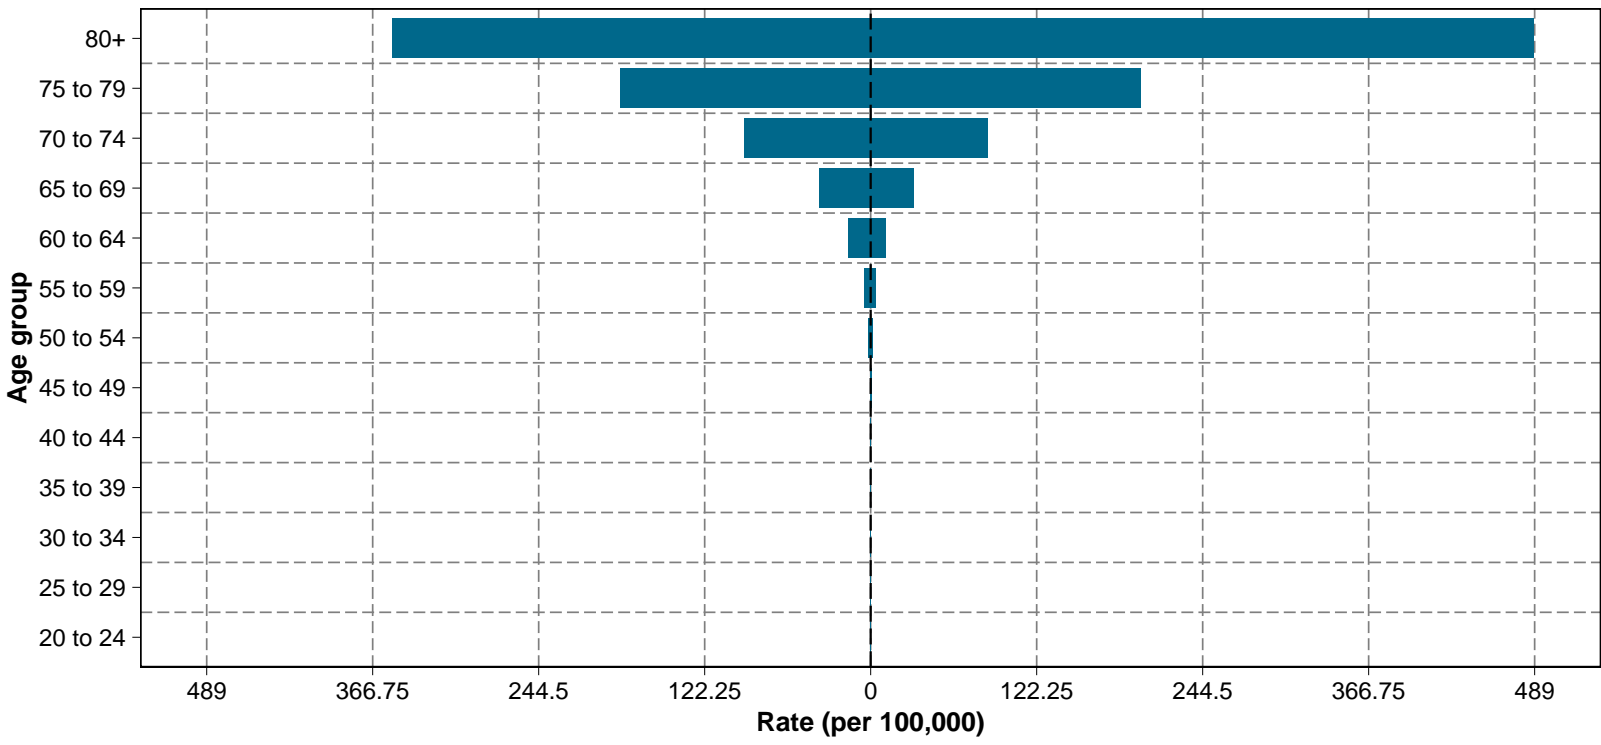

**DALYs**  
1990 2019

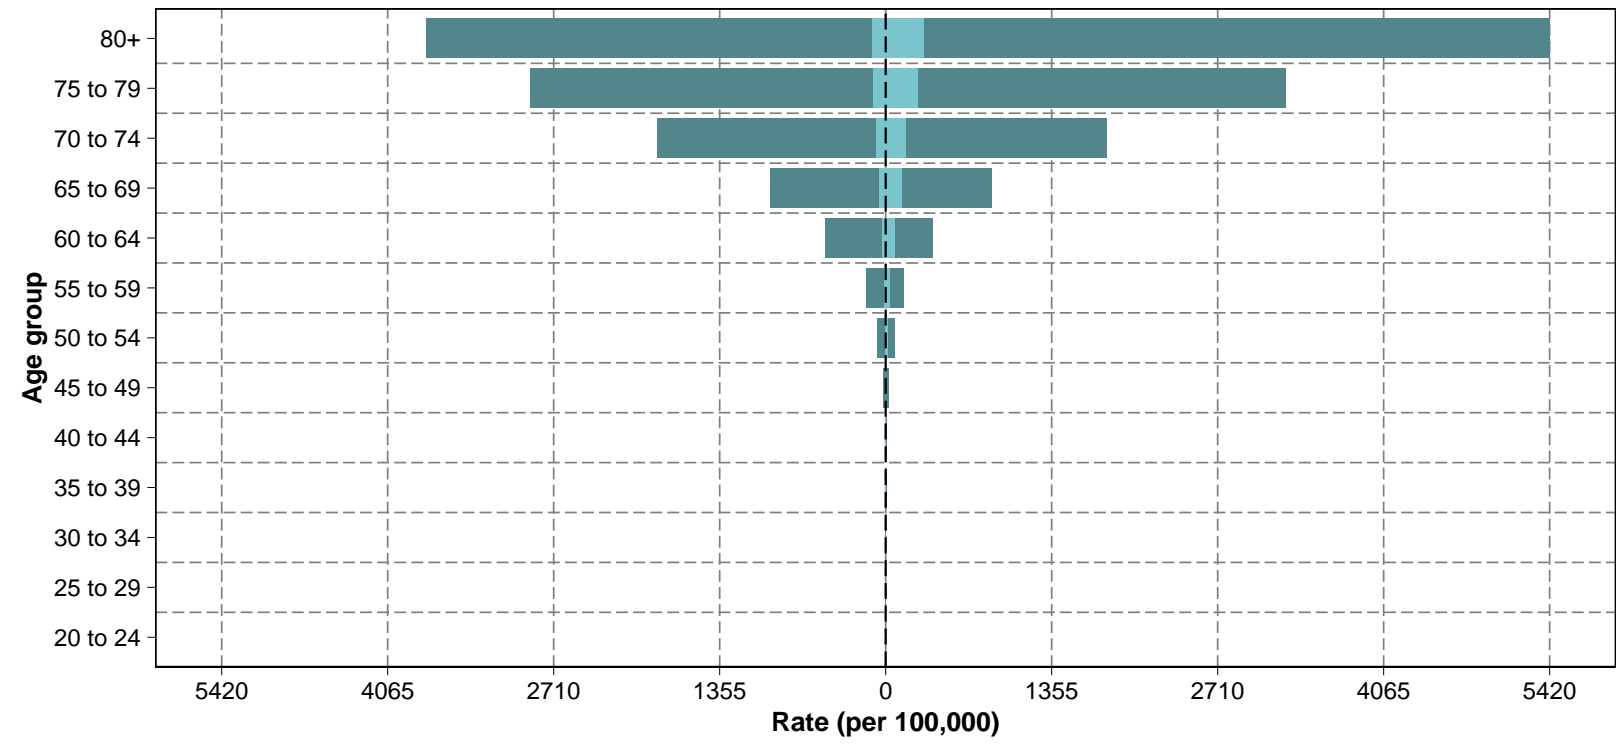

# Saudi Arabia

**Incidence**  
1990 2019

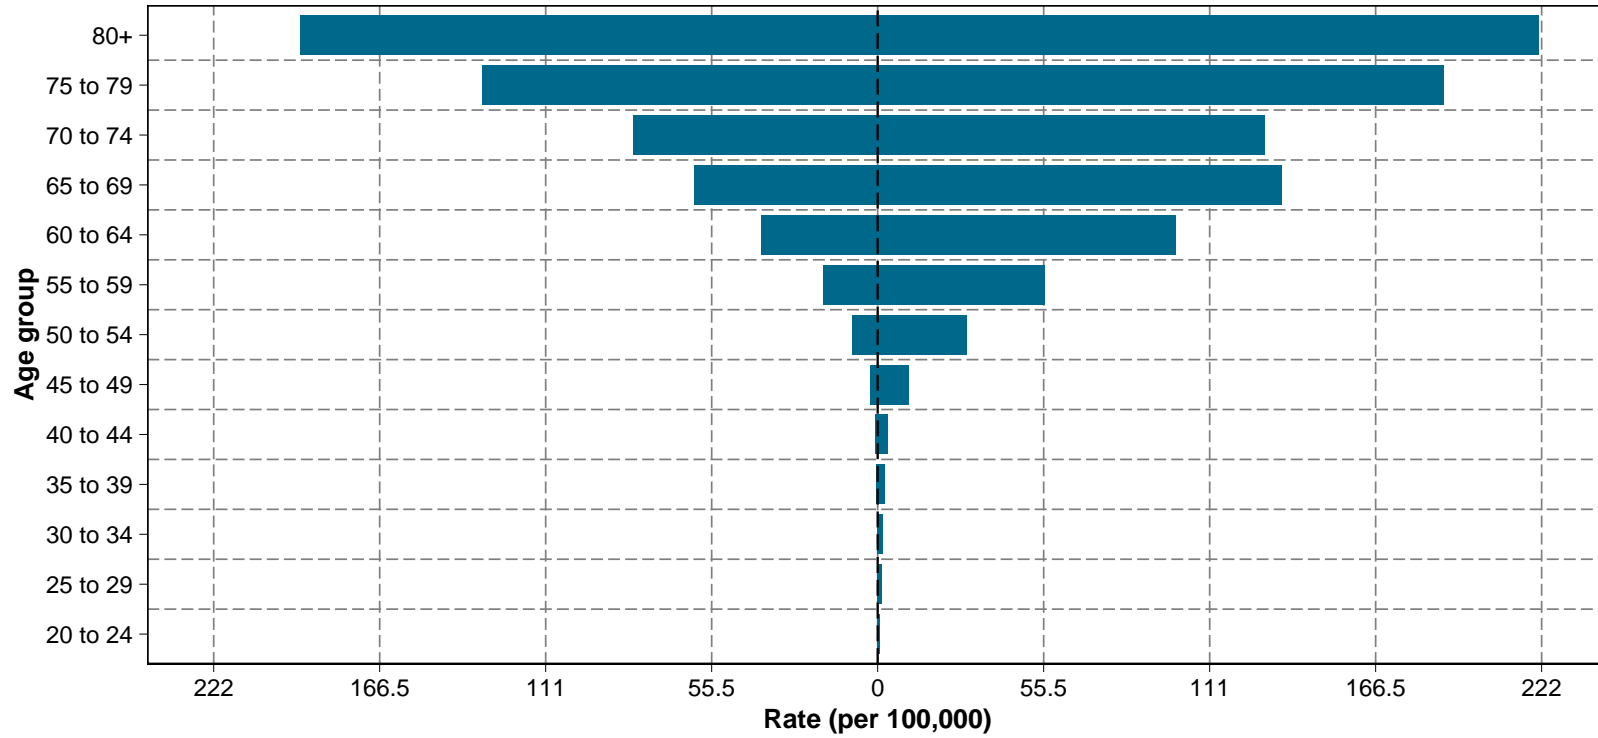

**Prevalence**  
1990 2019

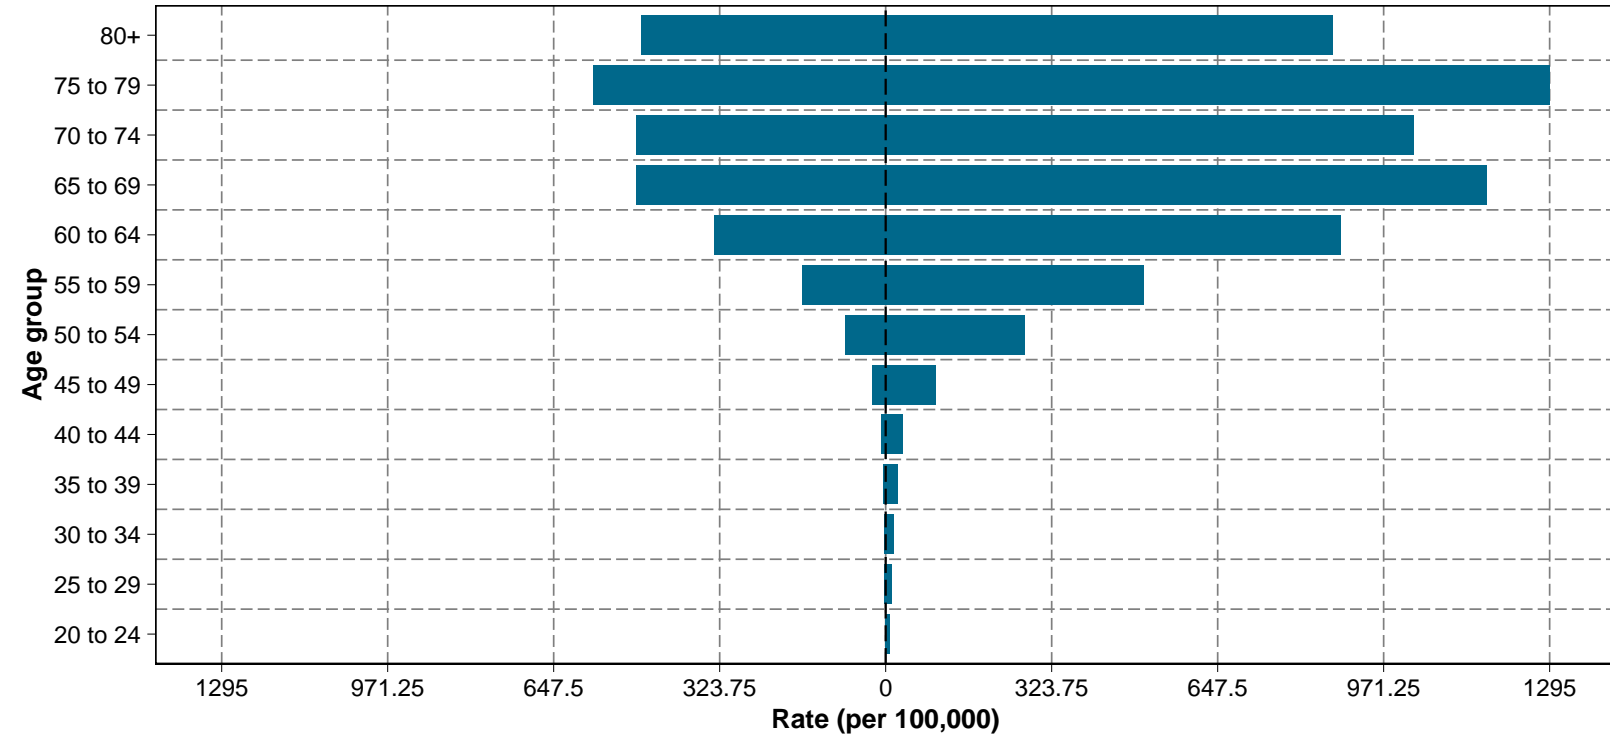

**Deaths**  
1990 2019

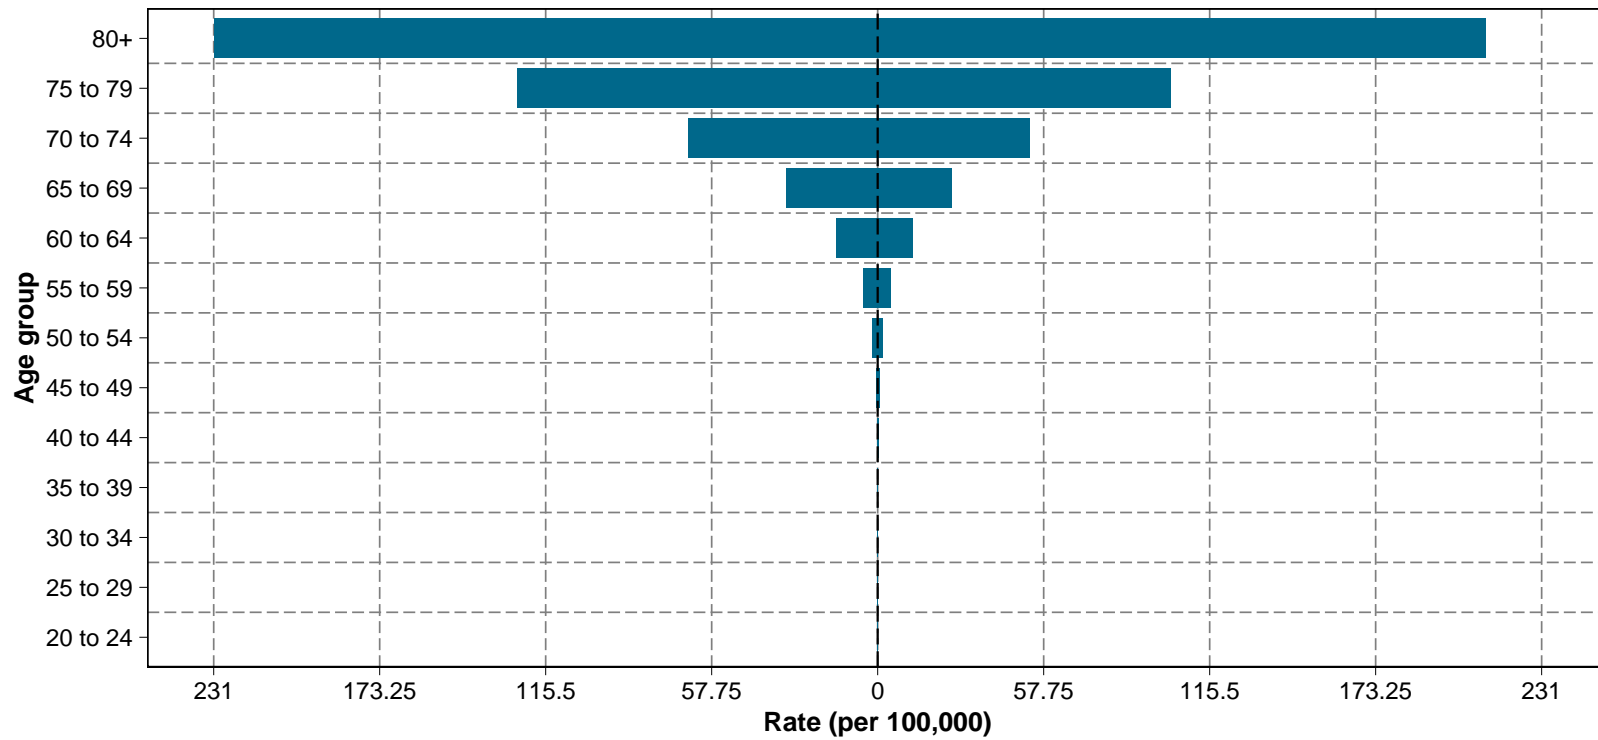

**DALYs**  
1990 2019

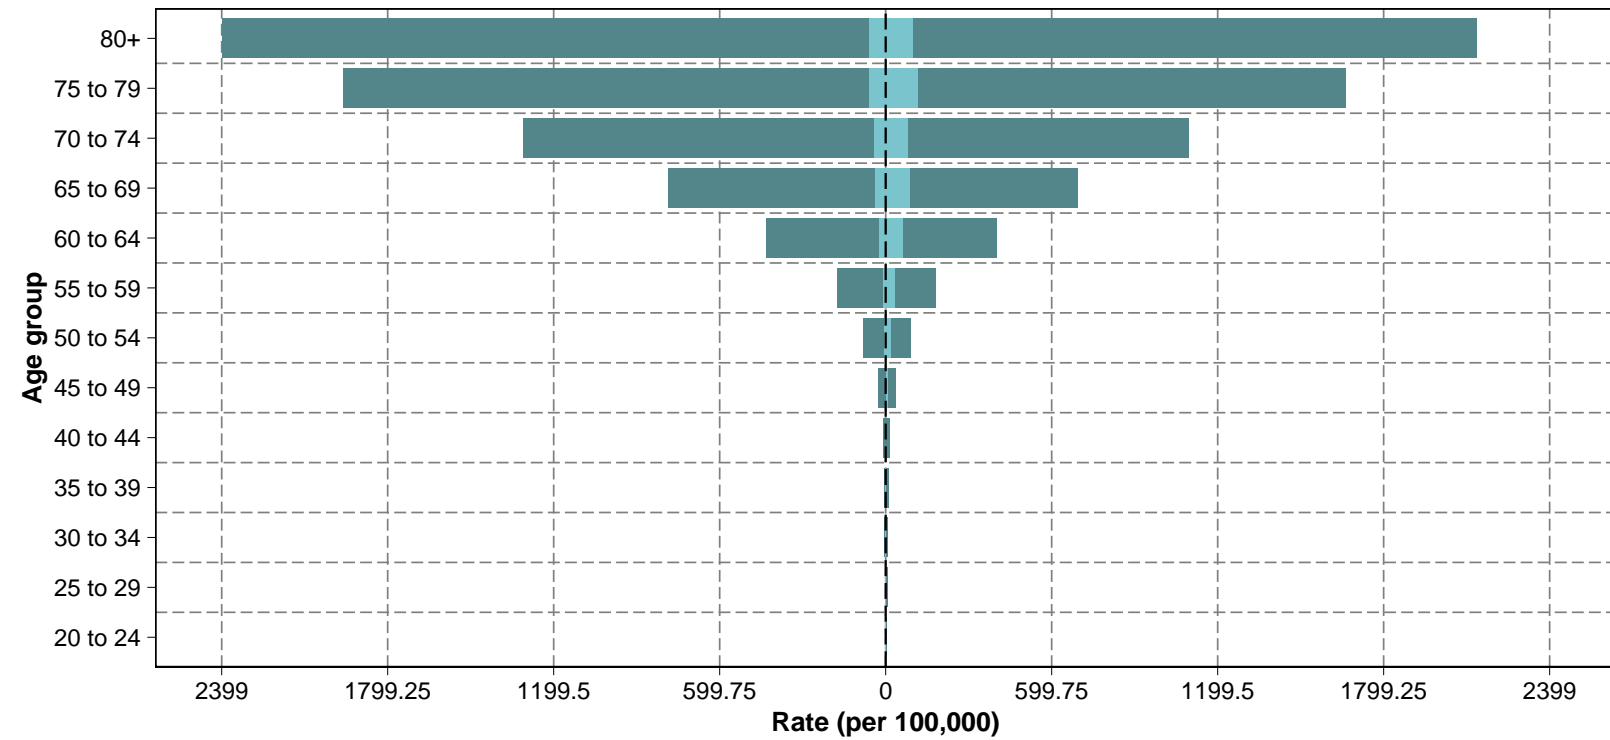

# Sudan

**Incidence**  
1990 2019

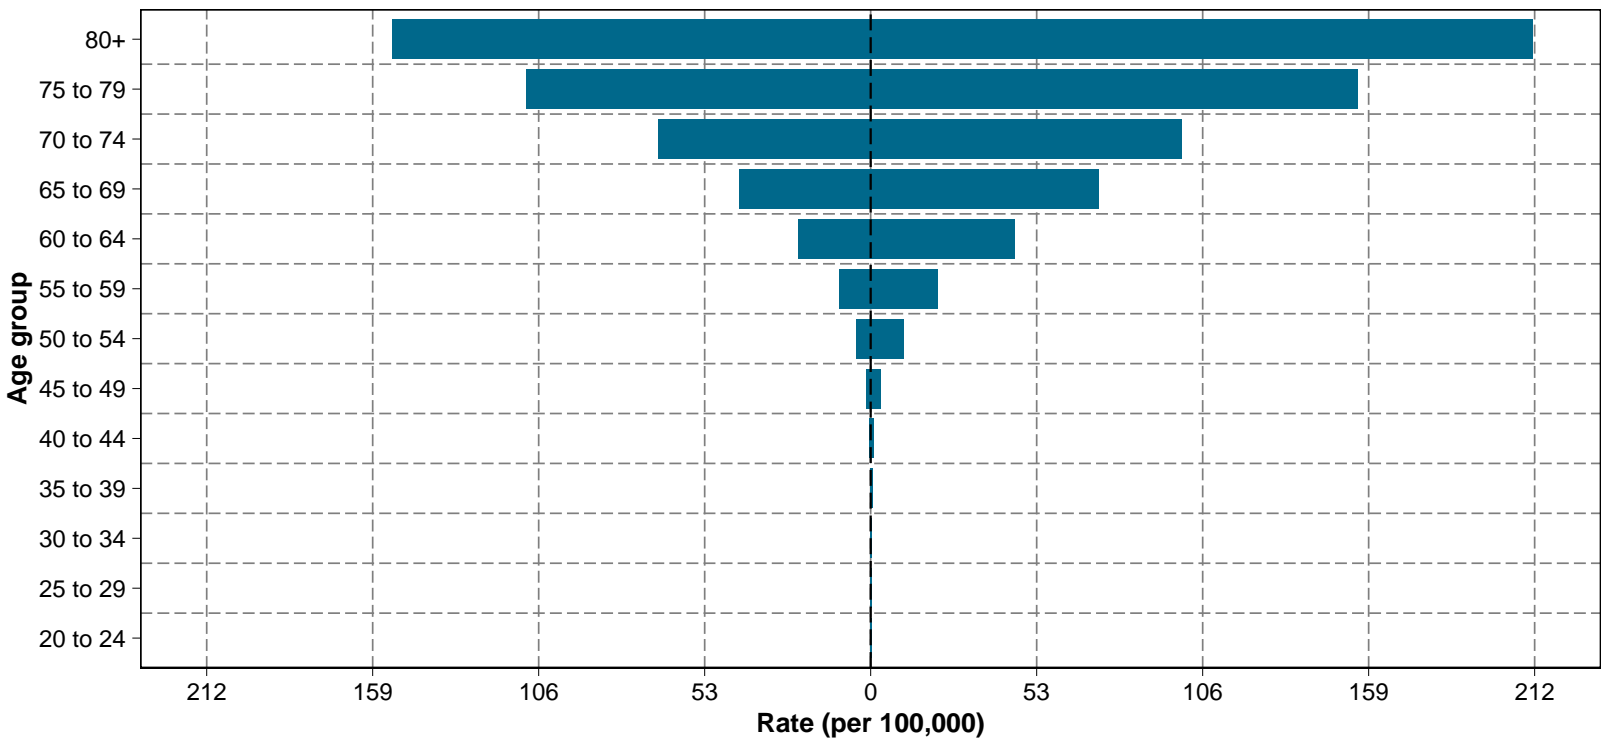

**Prevalence**  
1990 2019

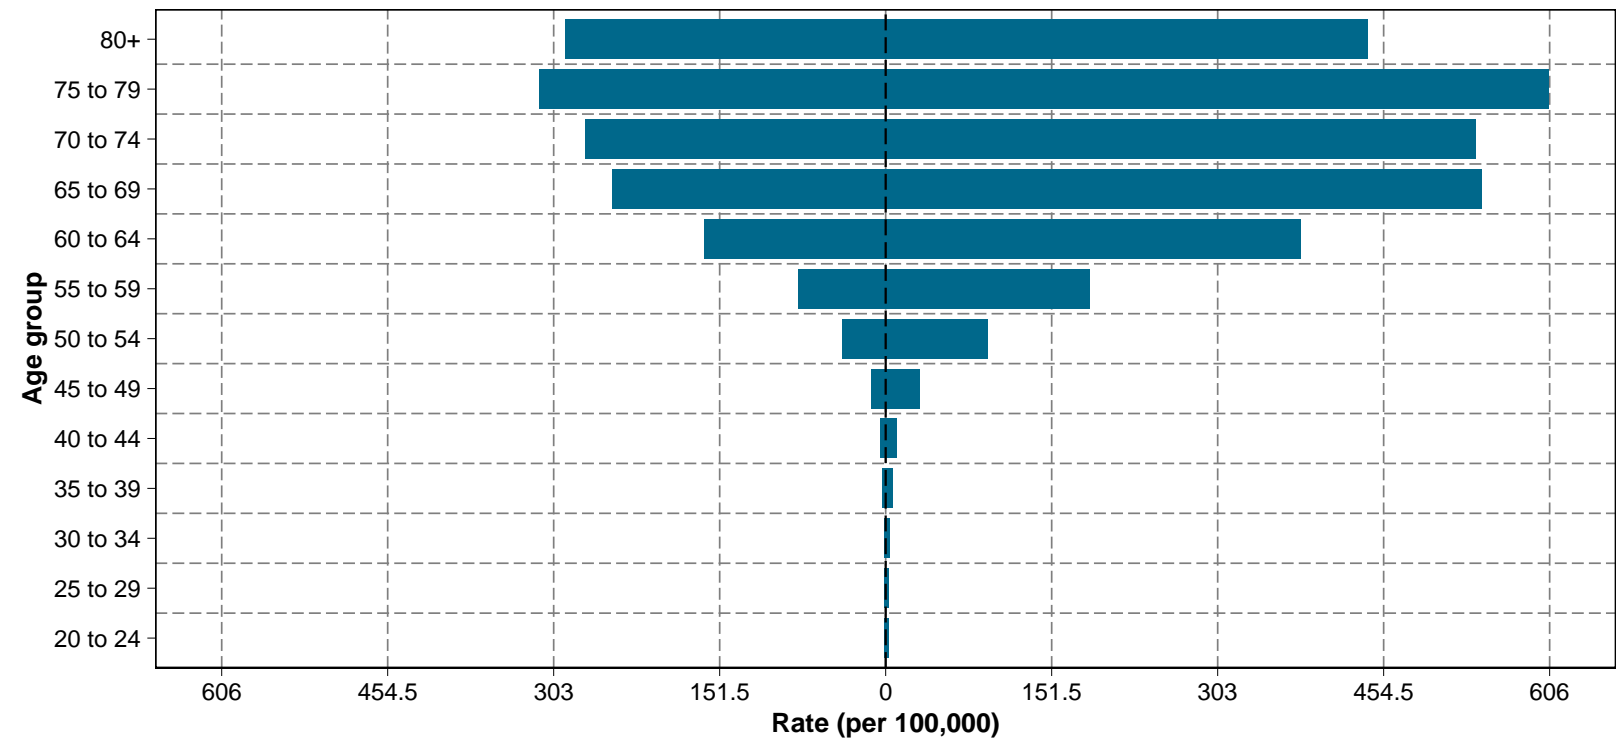

**Deaths**  
1990 2019

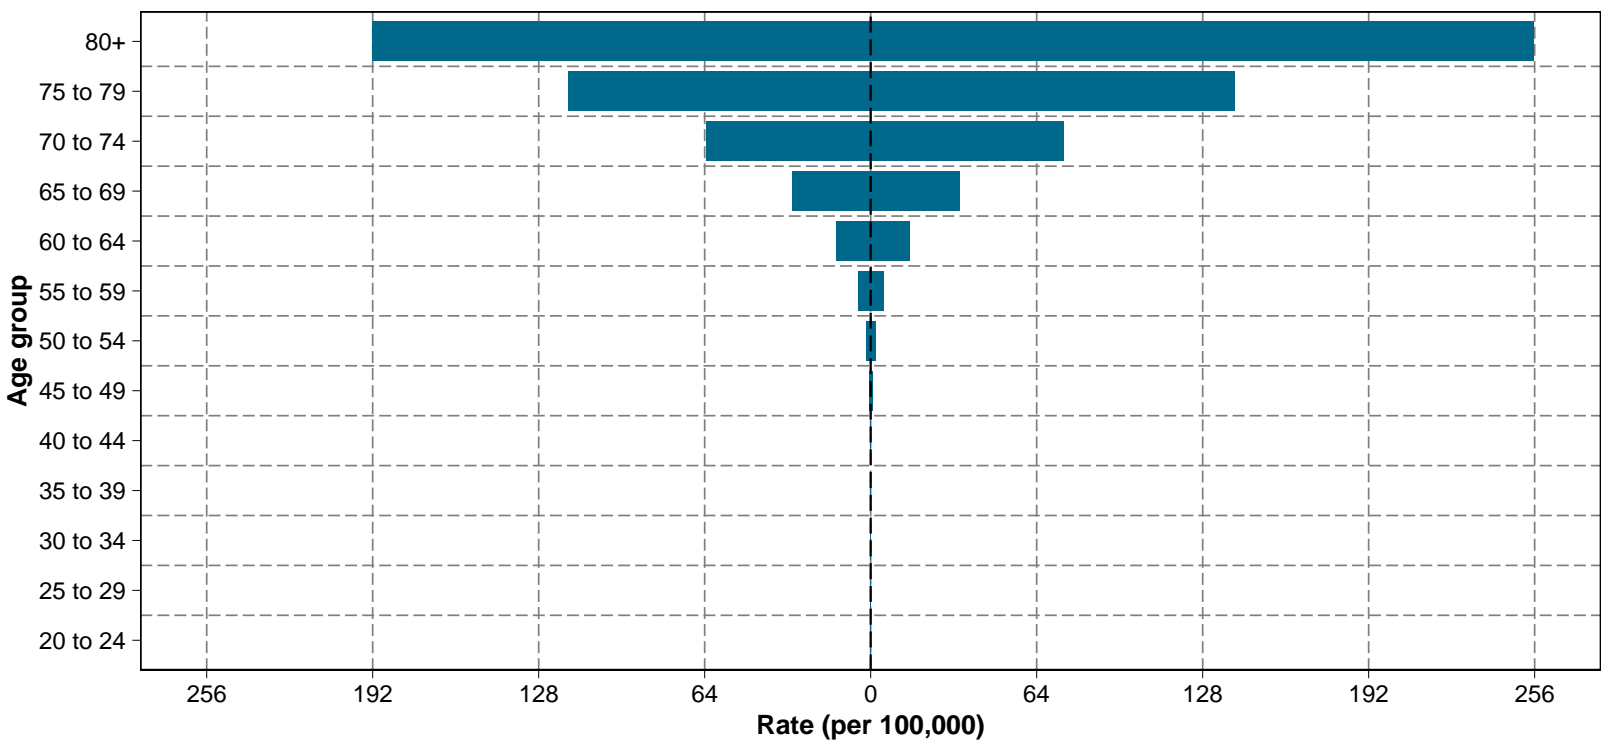

**DALYs**  
1990 2019

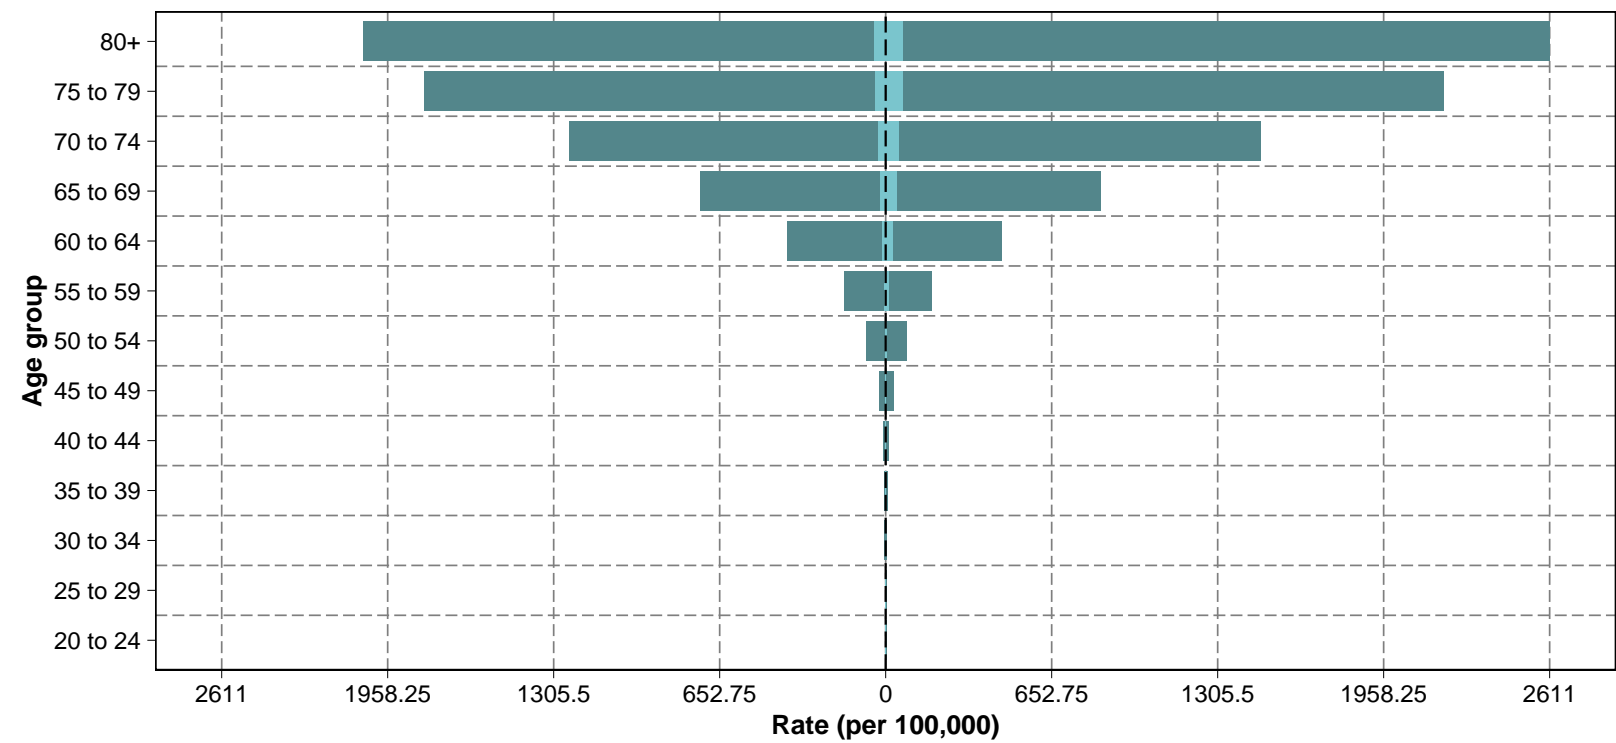

# Syrian Arab Republic

**Incidence**  
1990 2019

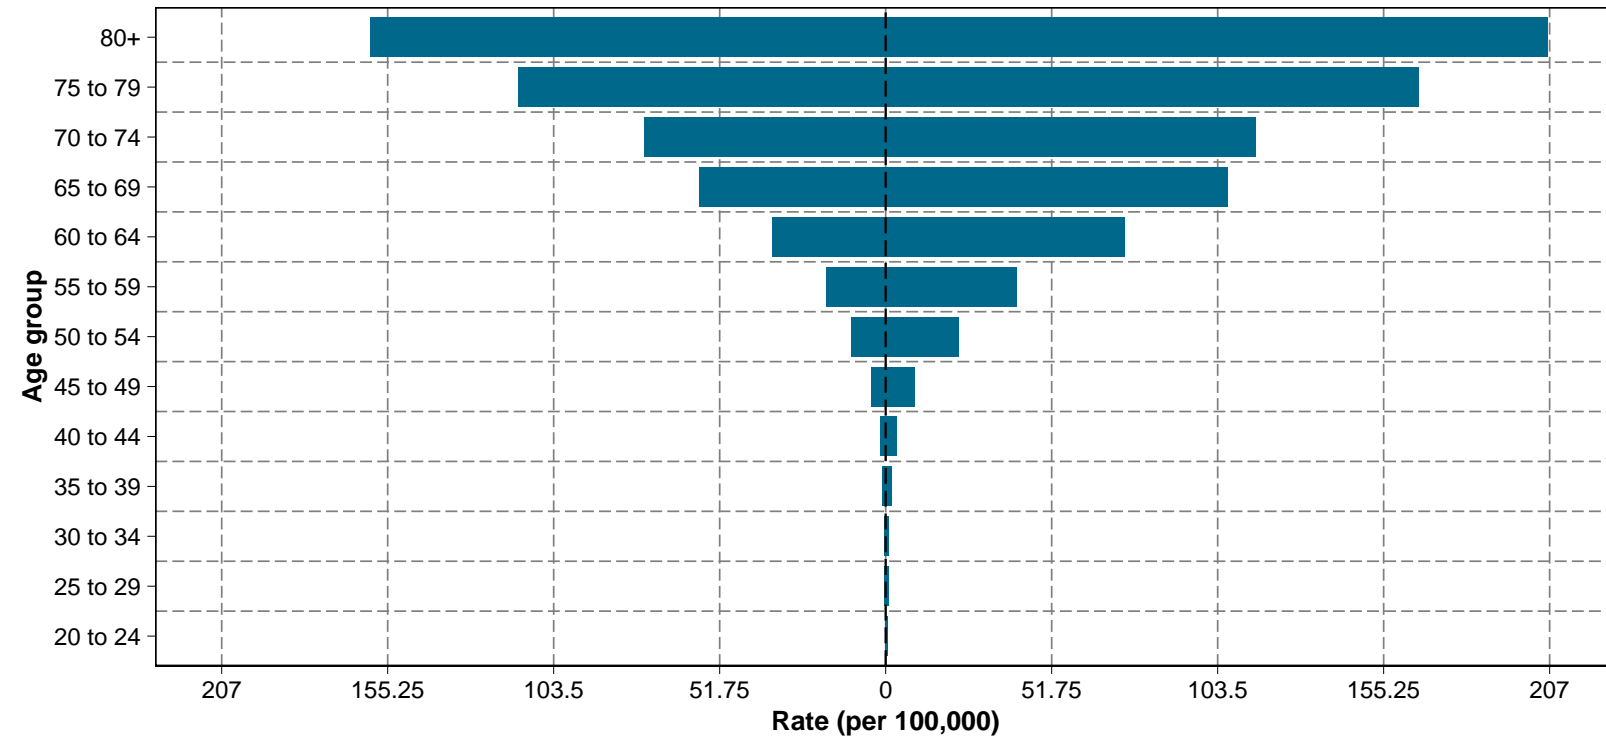

**Prevalence**  
1990 2019

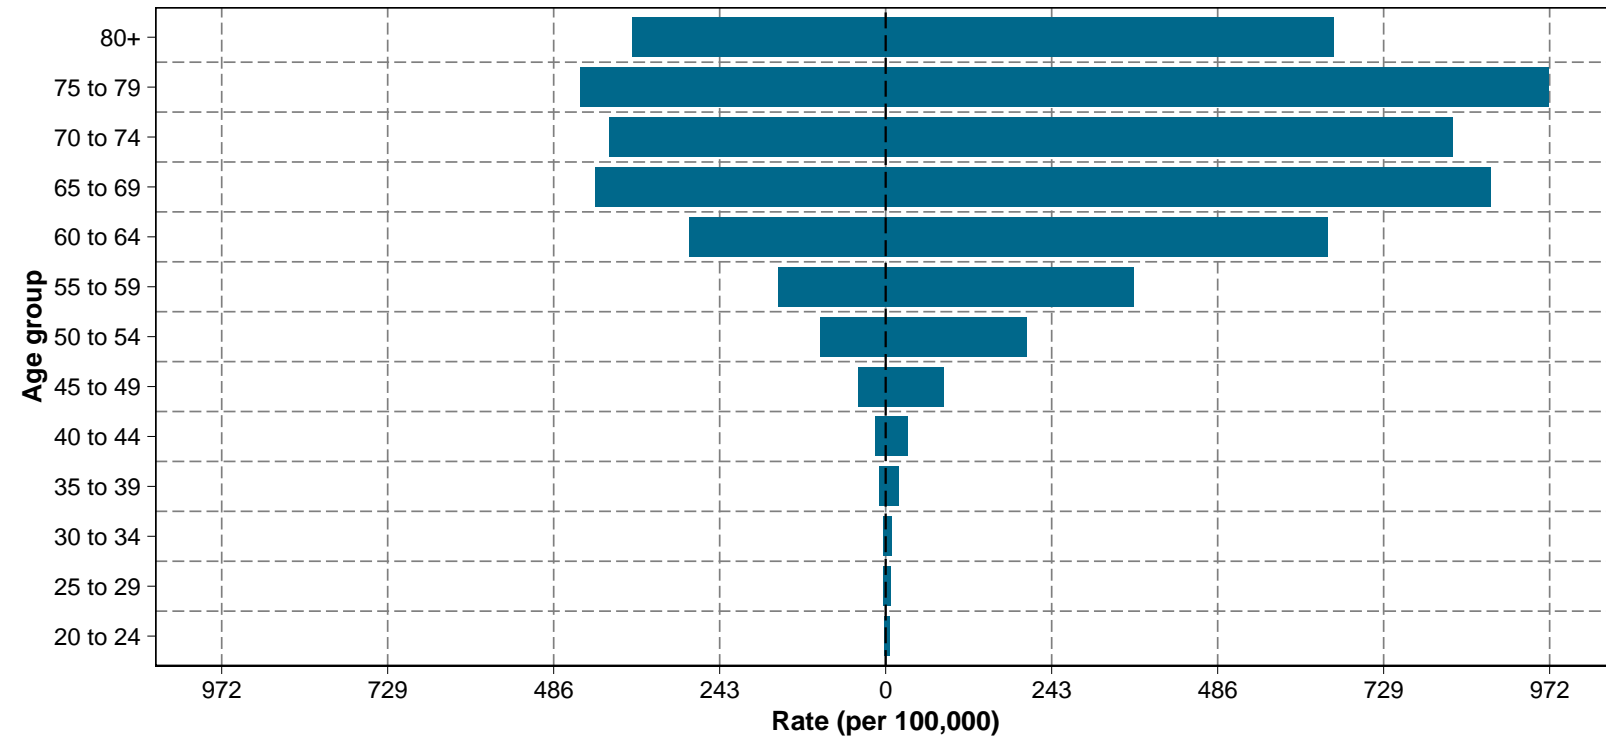

**Deaths**  
1990 2019

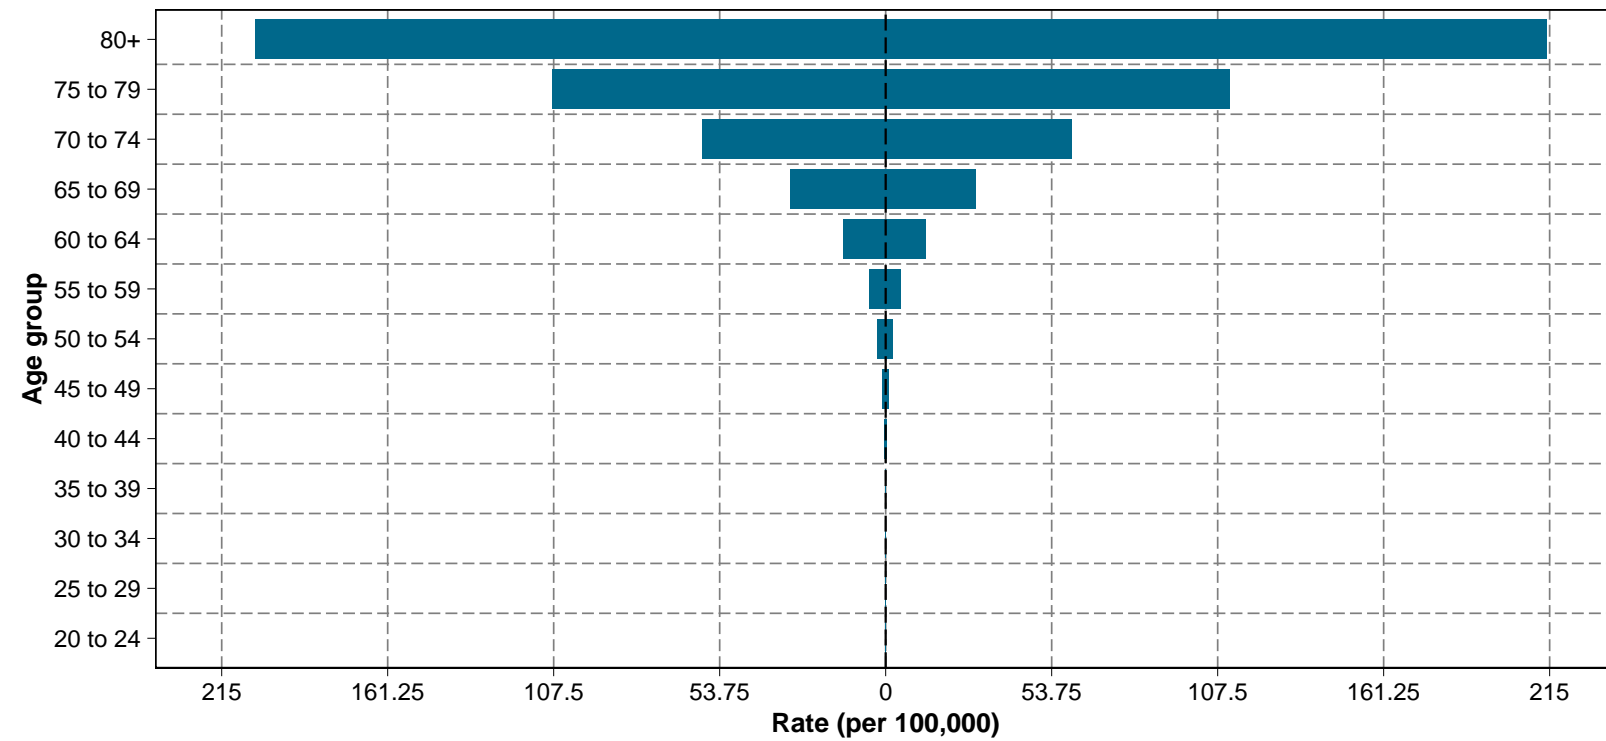

**DALYs**  
1990 2019

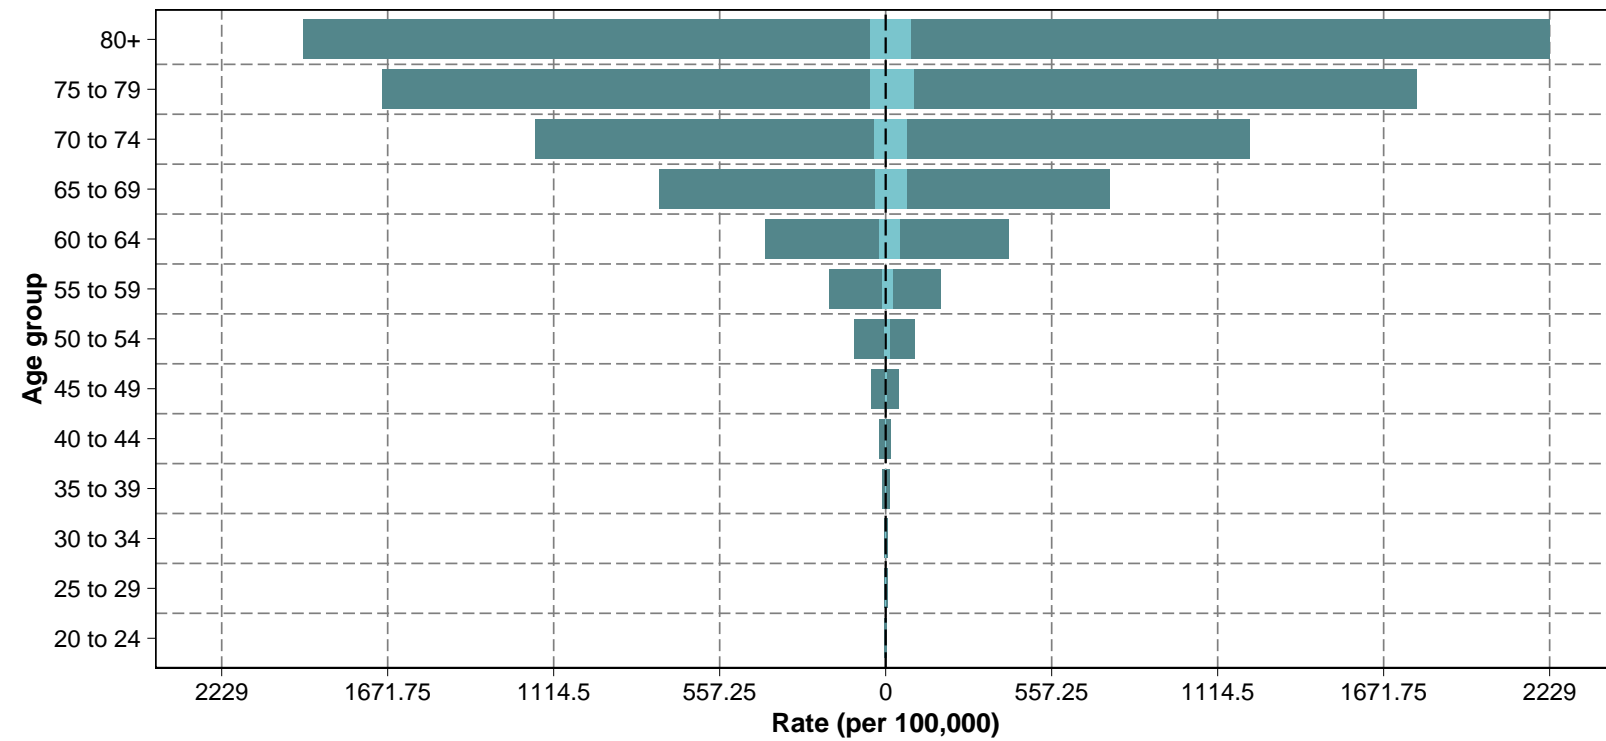



# Tunisia

**Incidence**  
1990 2019

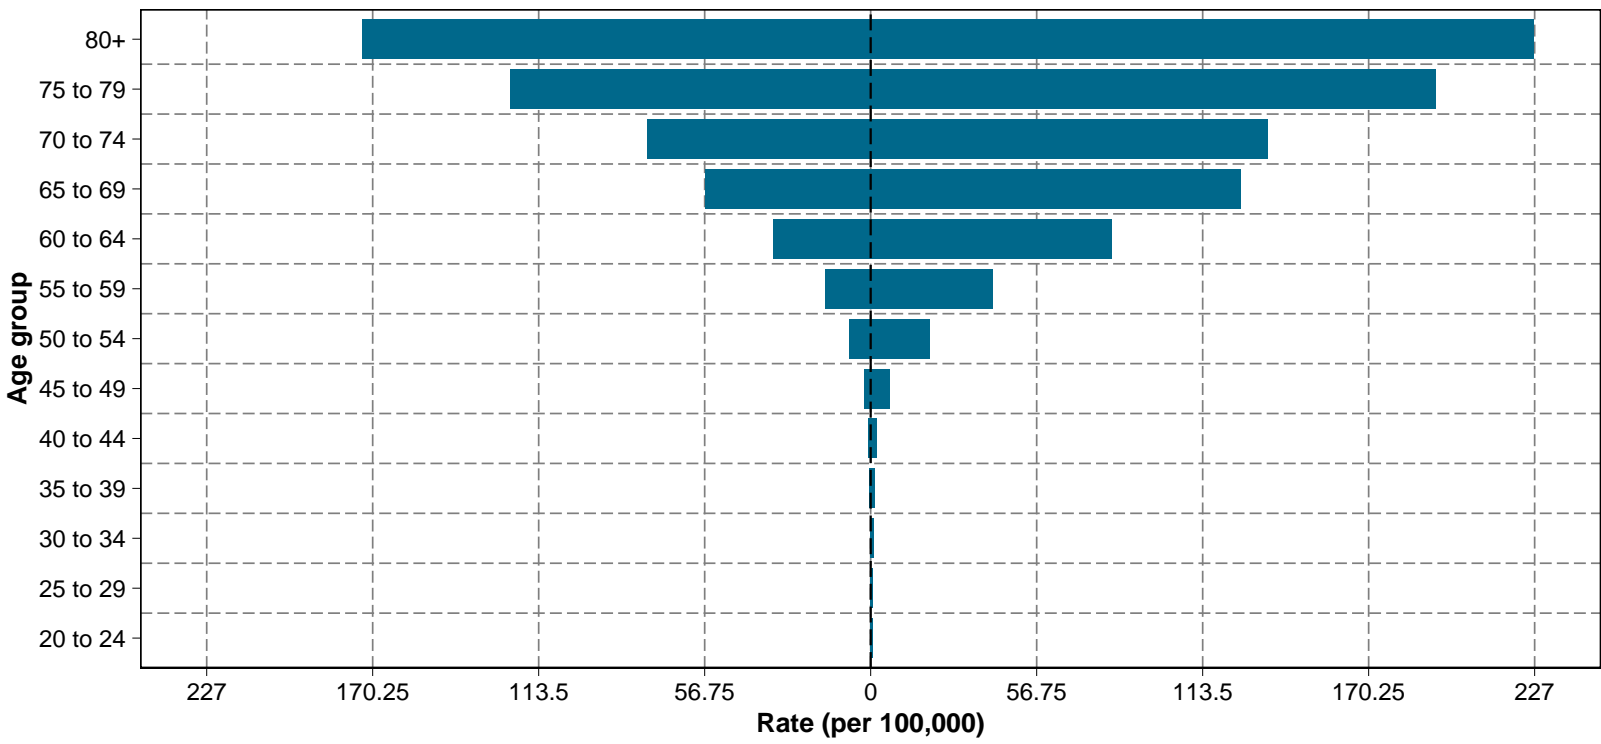

**Prevalence**  
1990 2019

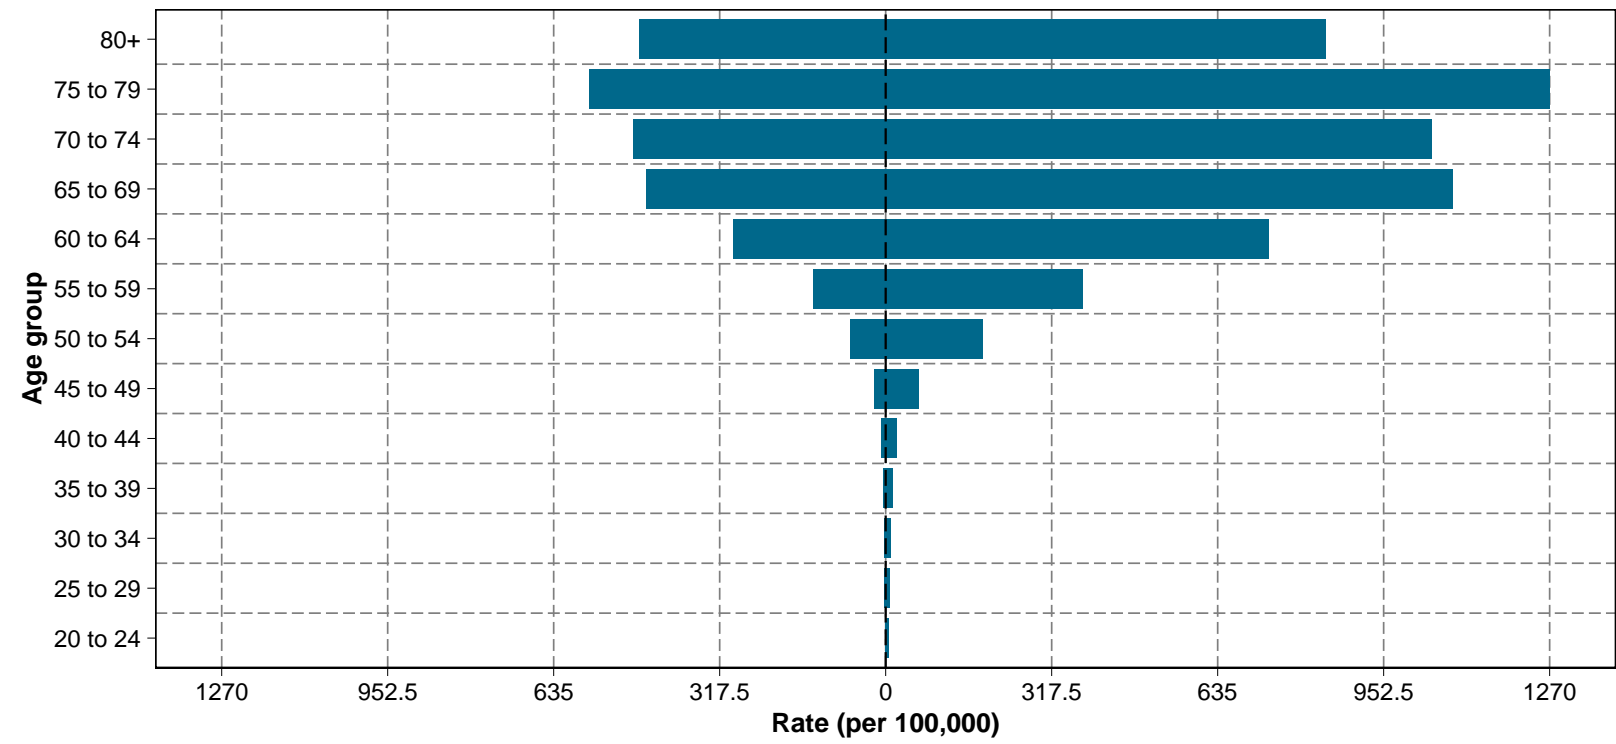

**Deaths**  
1990 2019

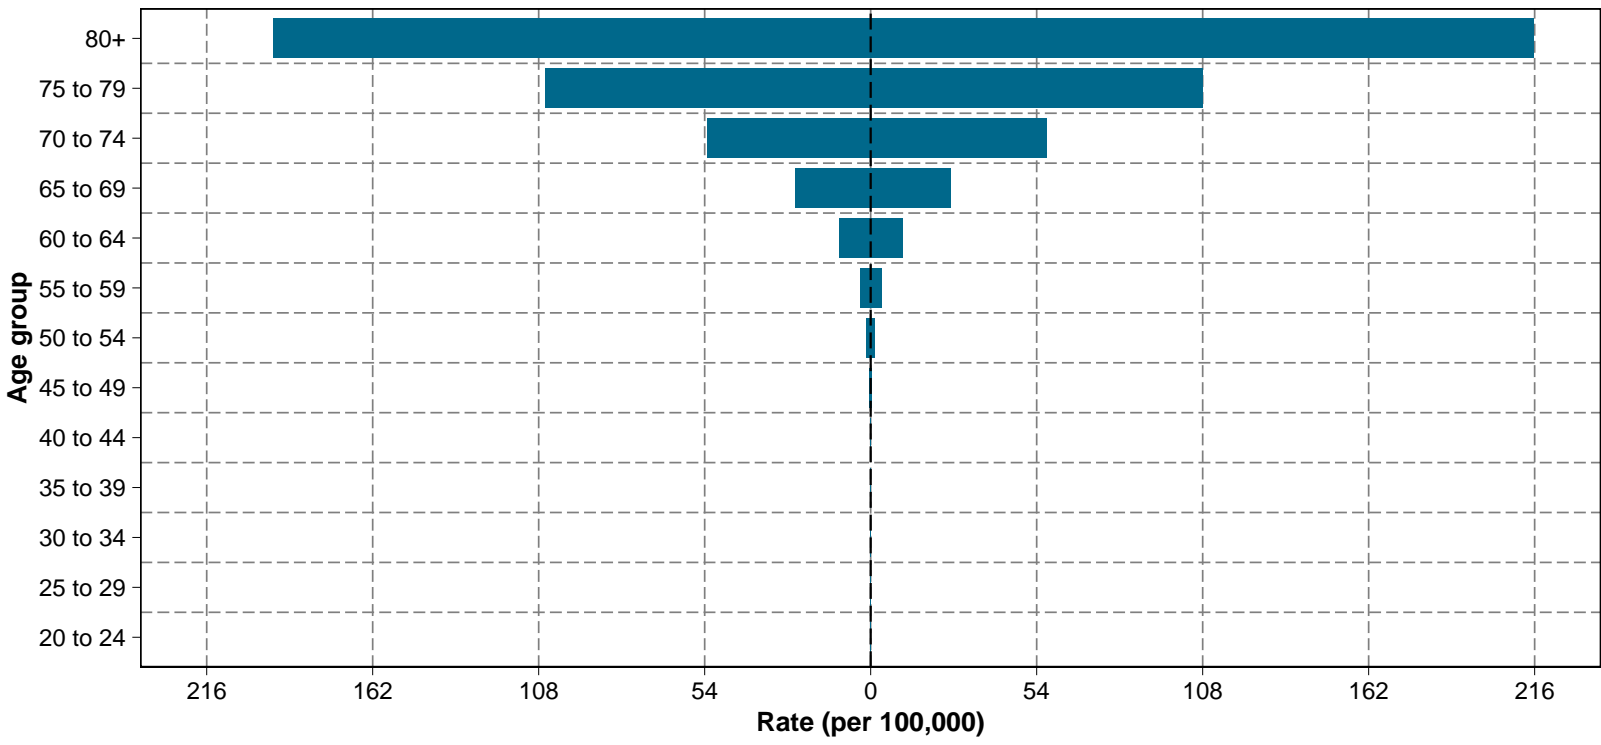

**DALYs**  
1990 2019

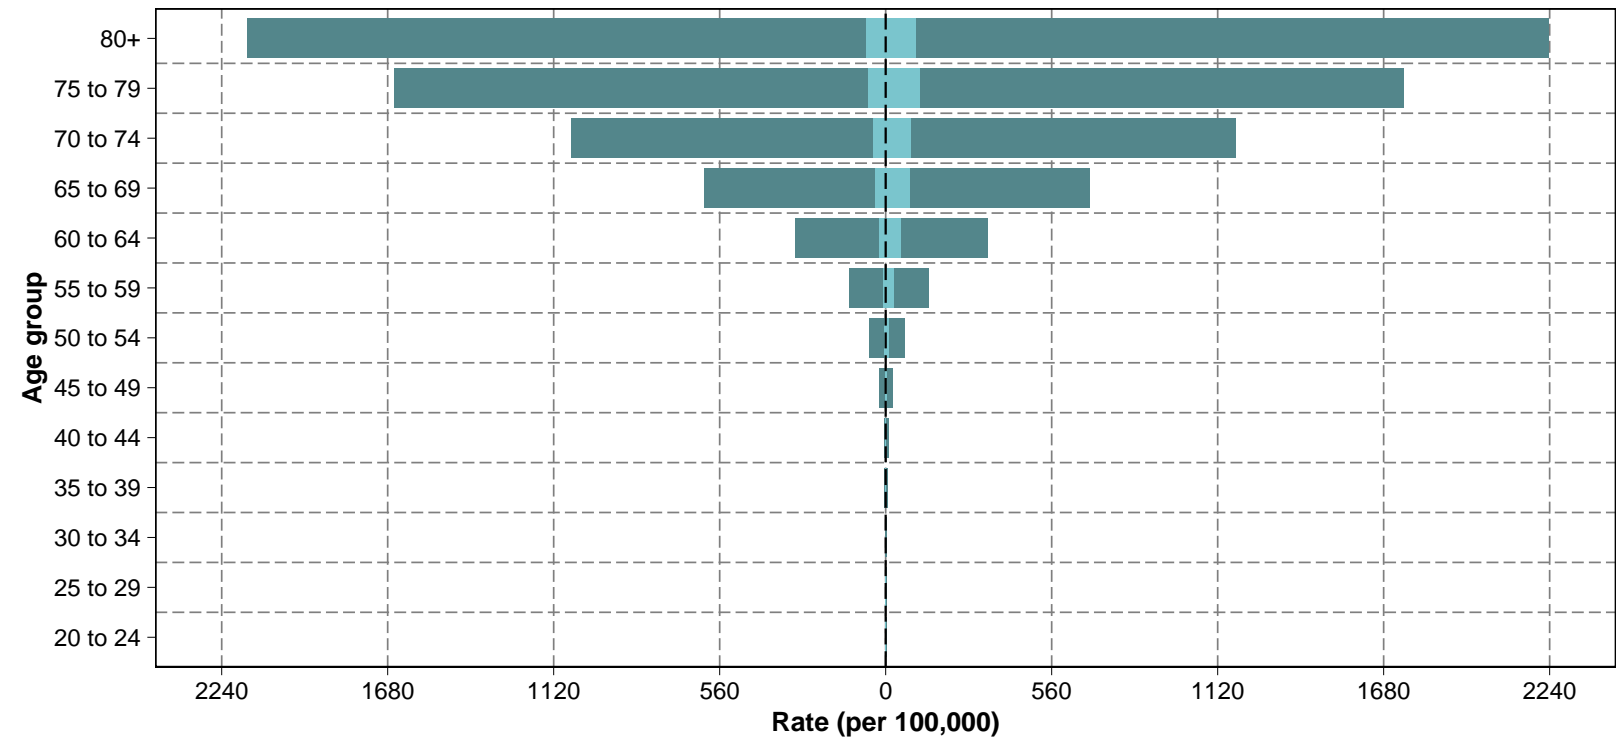

# Turkey

**Incidence**  
1990 2019

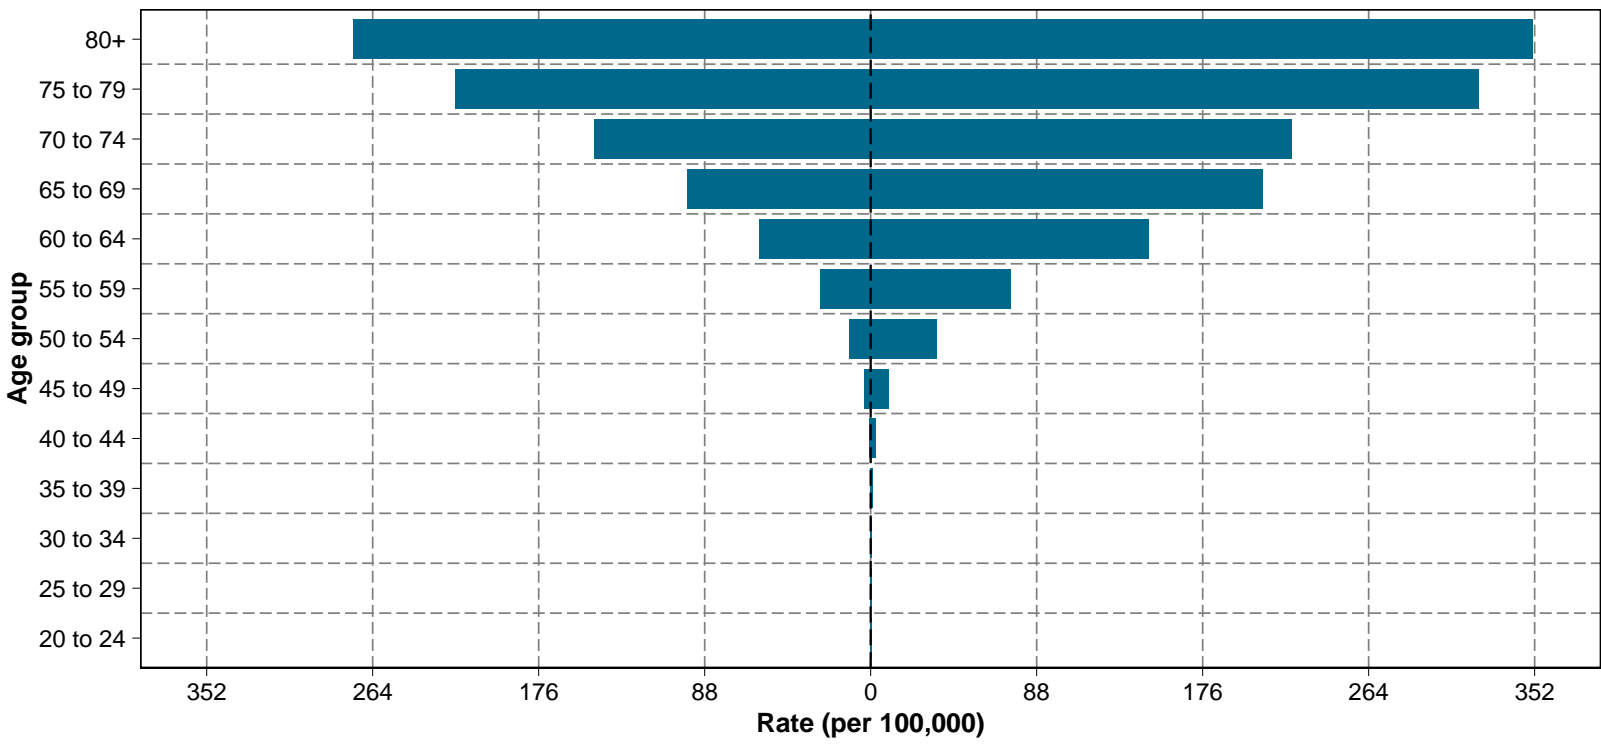

**Prevalence**  
1990 2019

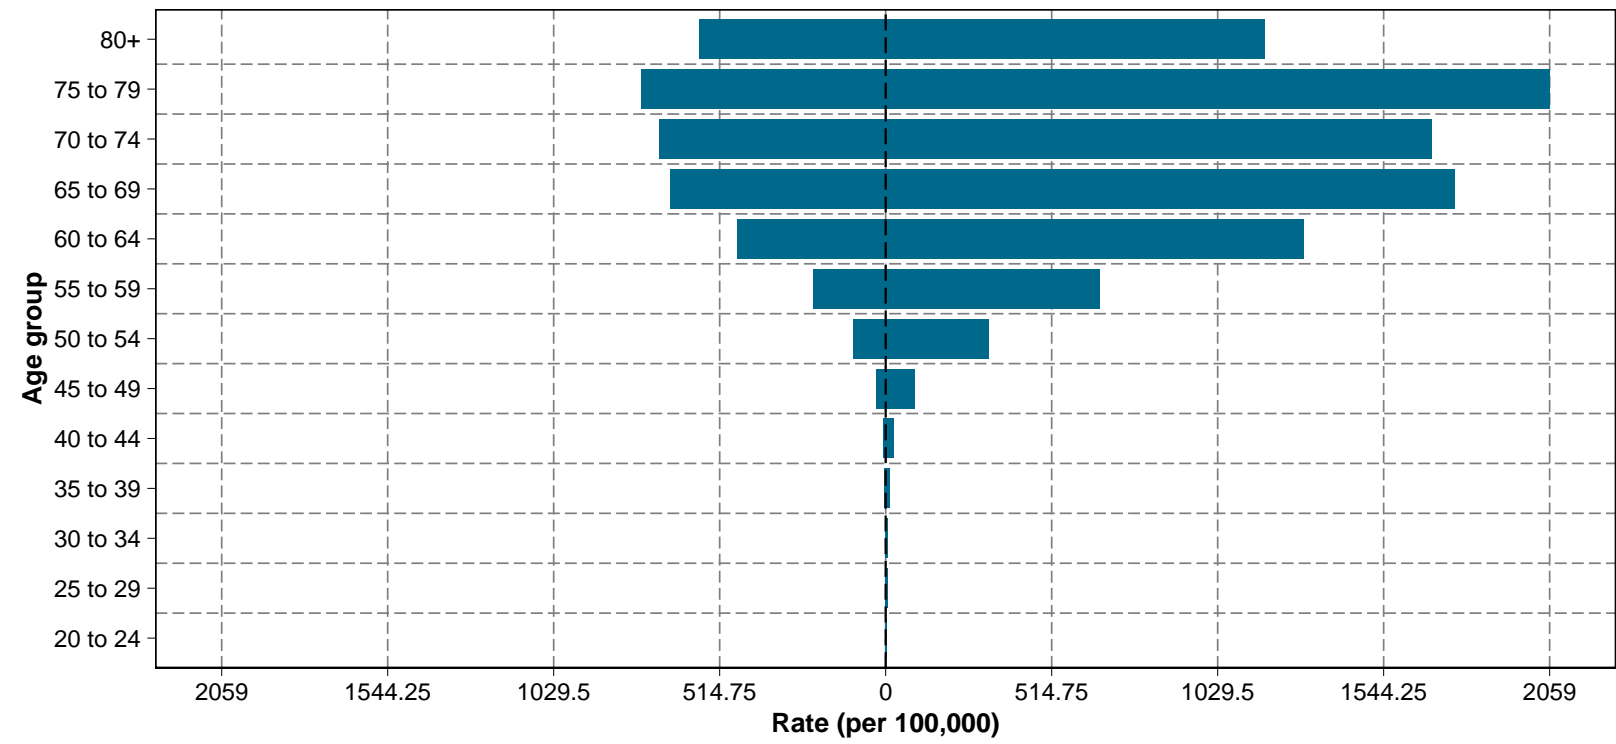

**Deaths**  
1990 2019

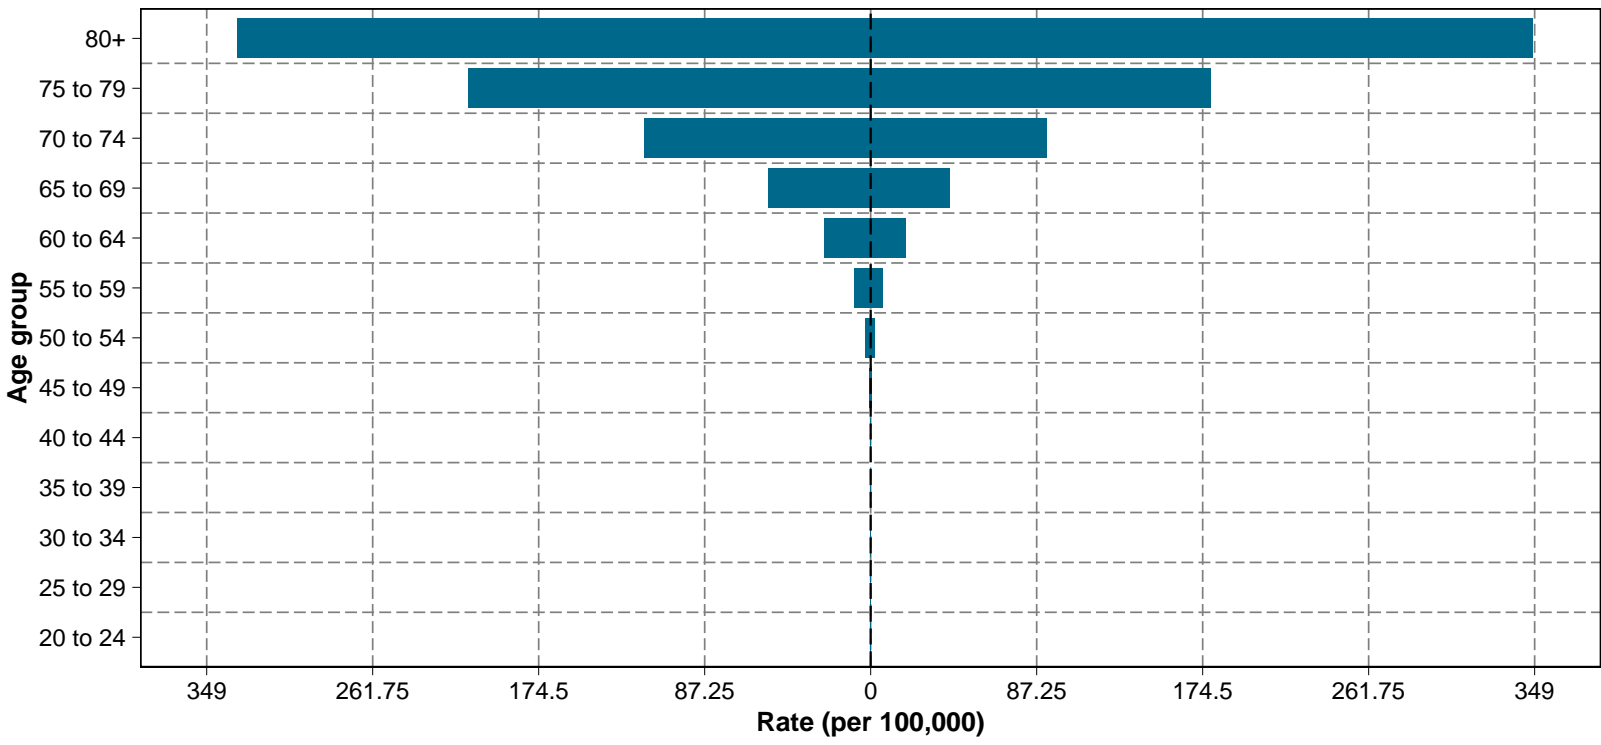

**DALYs**  
1990 2019

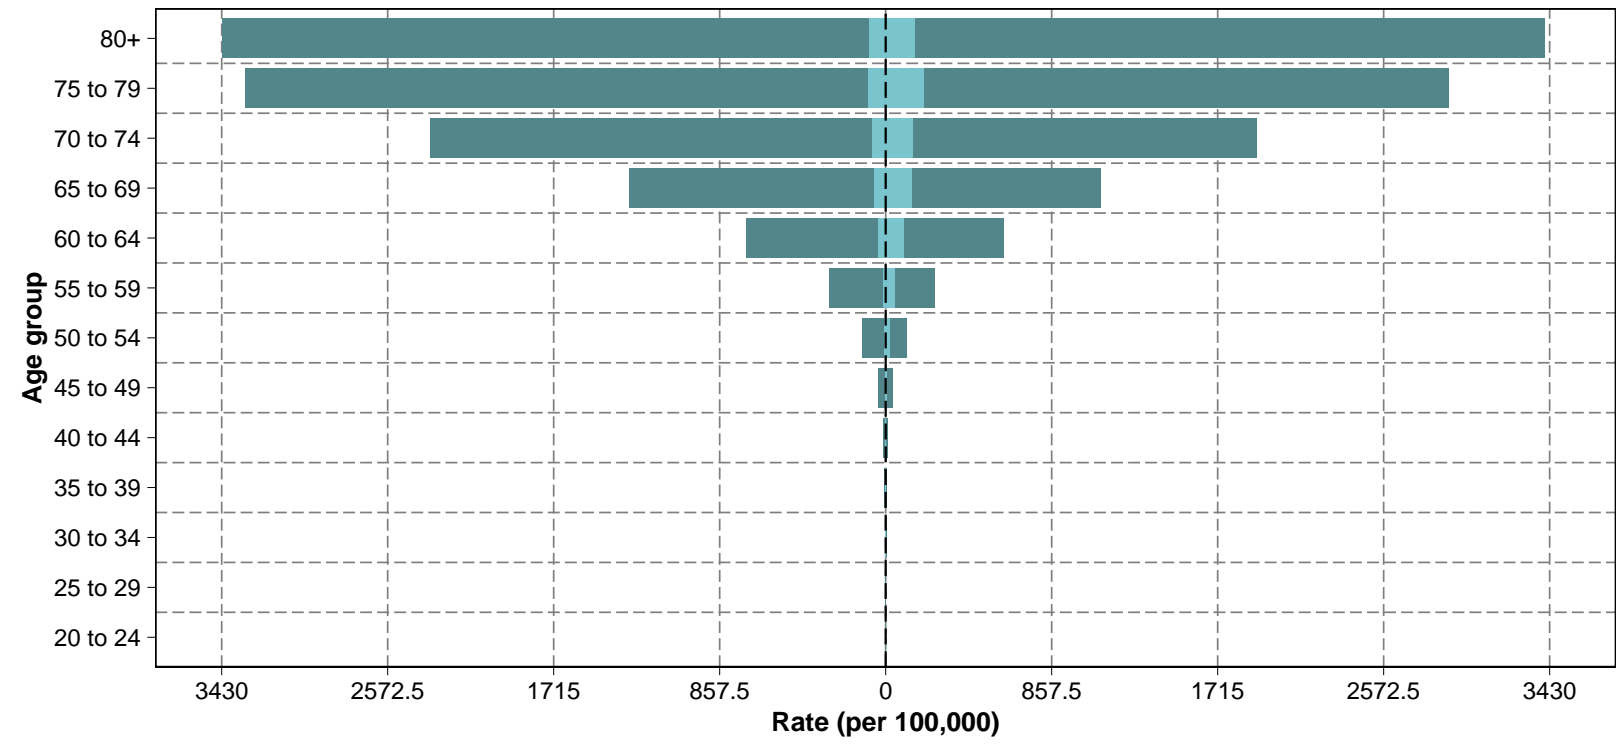

# United Arab Emirates

**Incidence**  
1990 2019

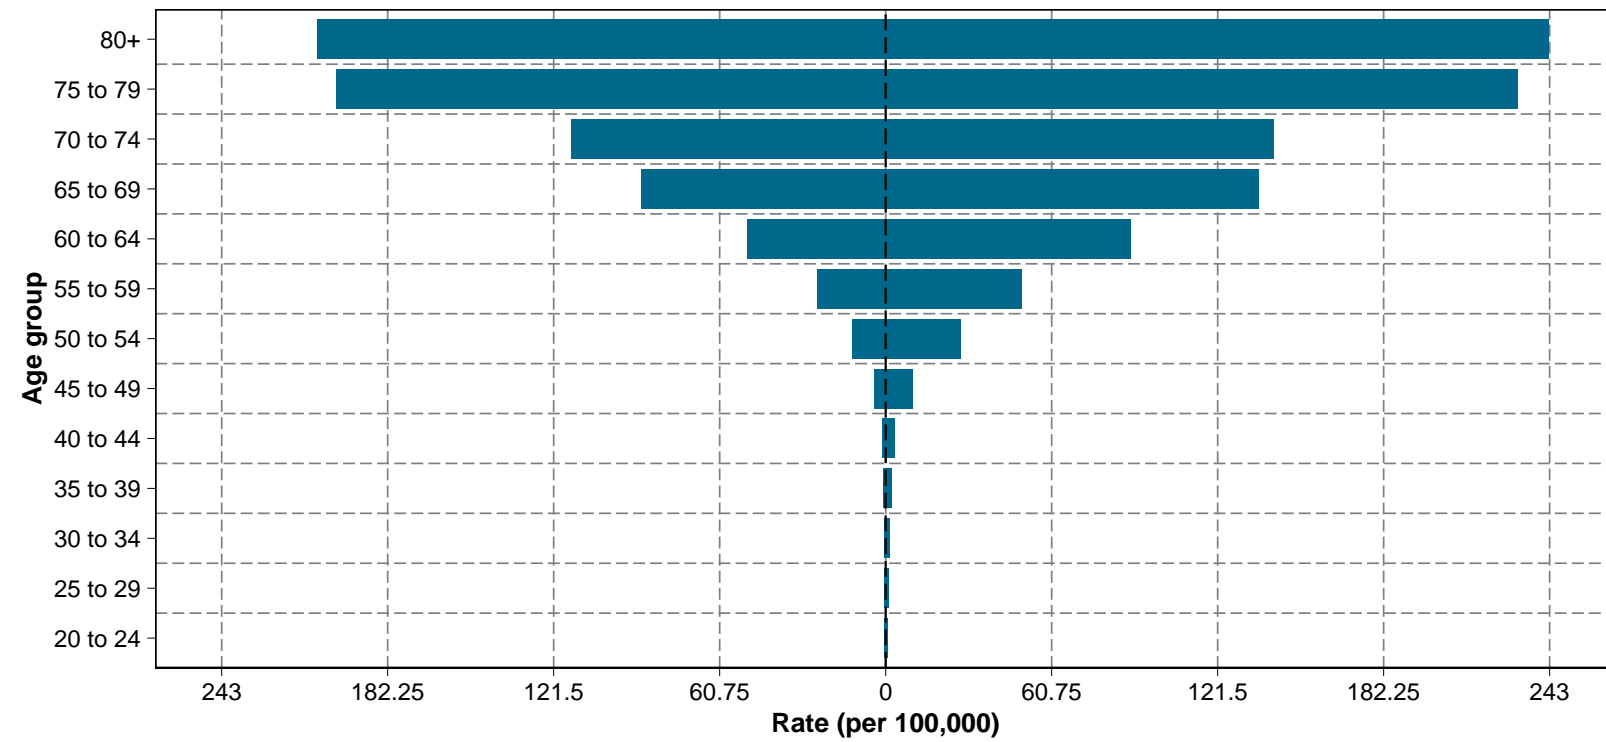

**Prevalence**  
1990 2019

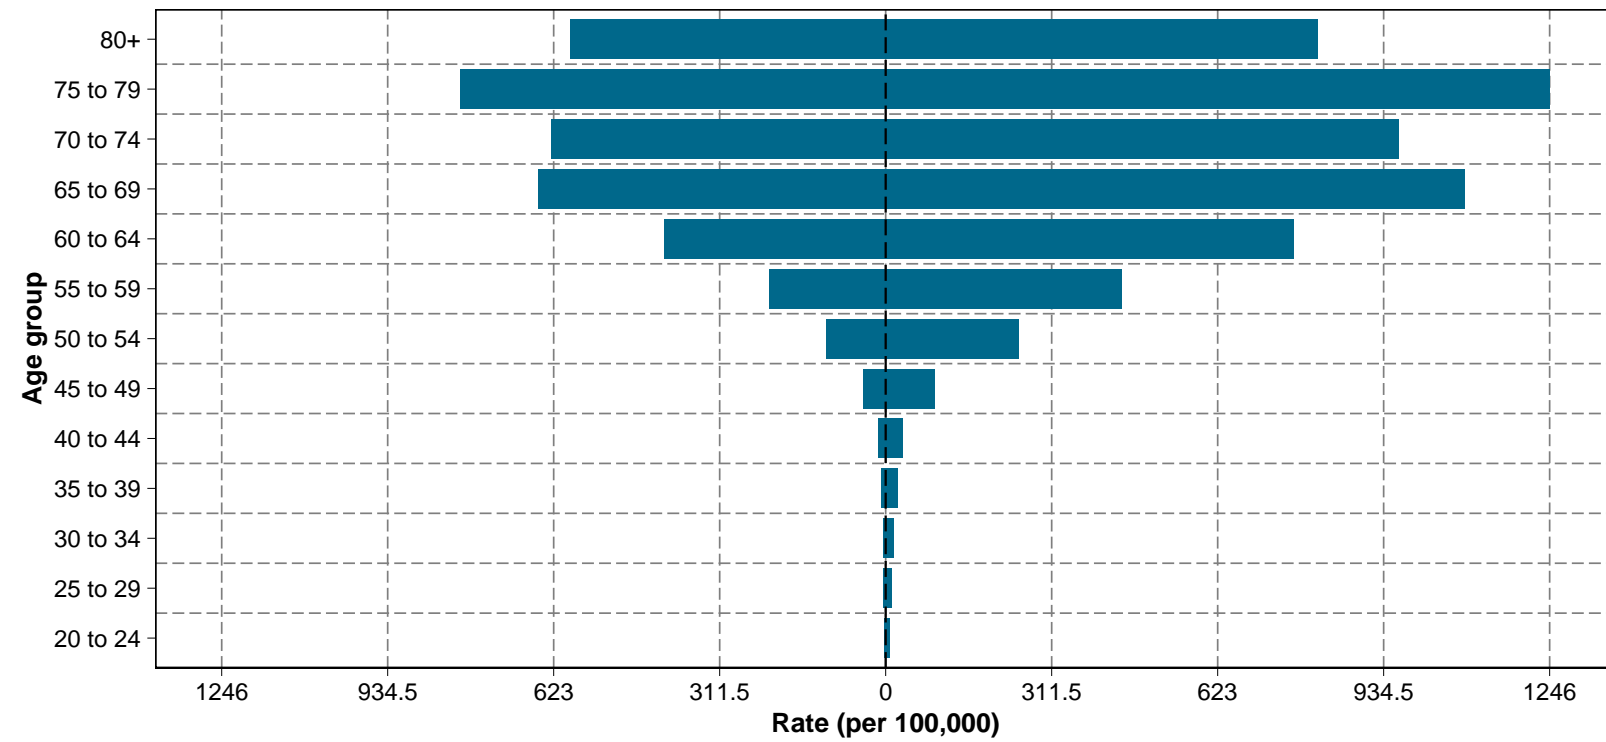

**Deaths**  
1990 2019

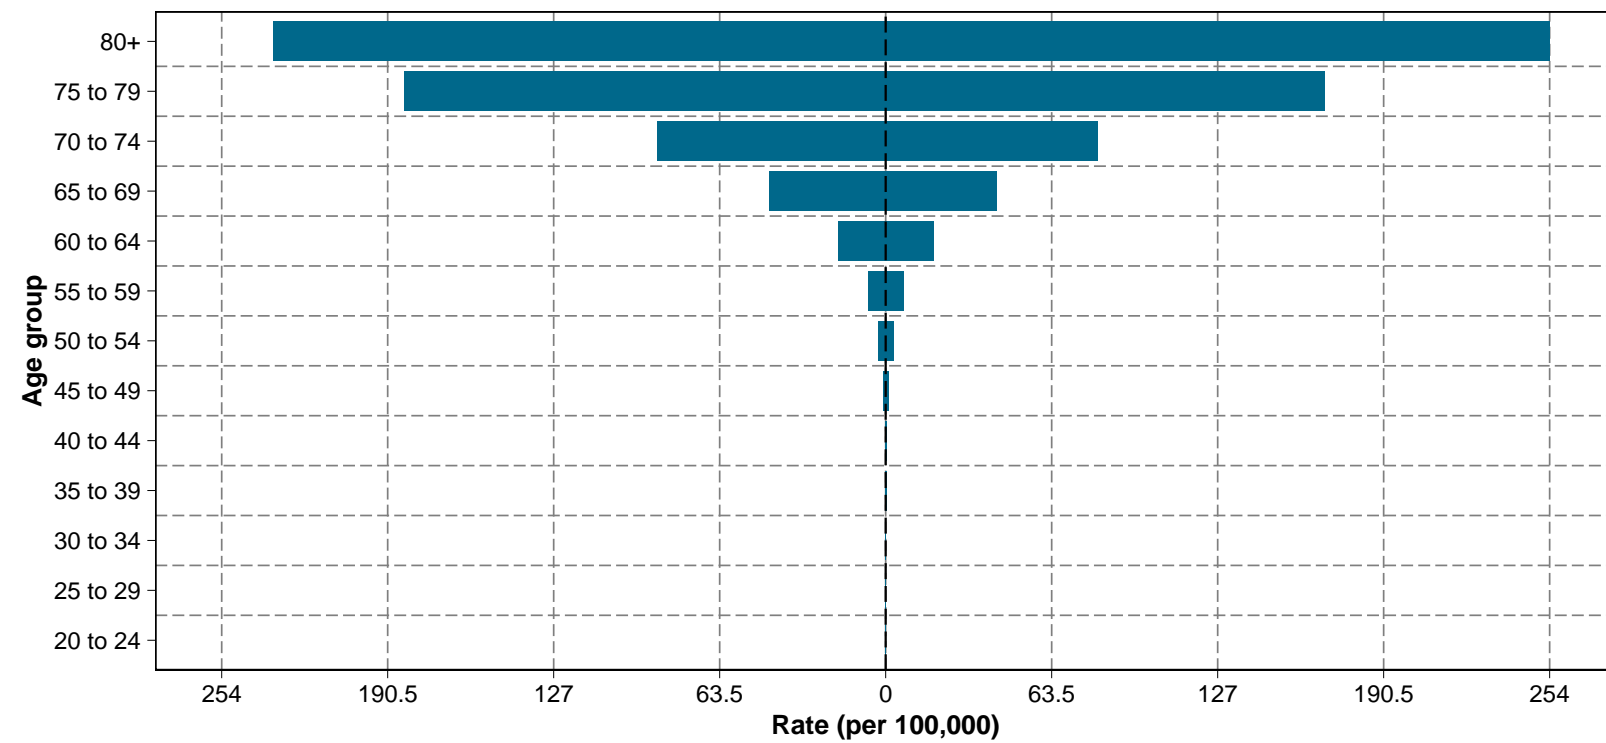

**DALYs**  
1990 2019

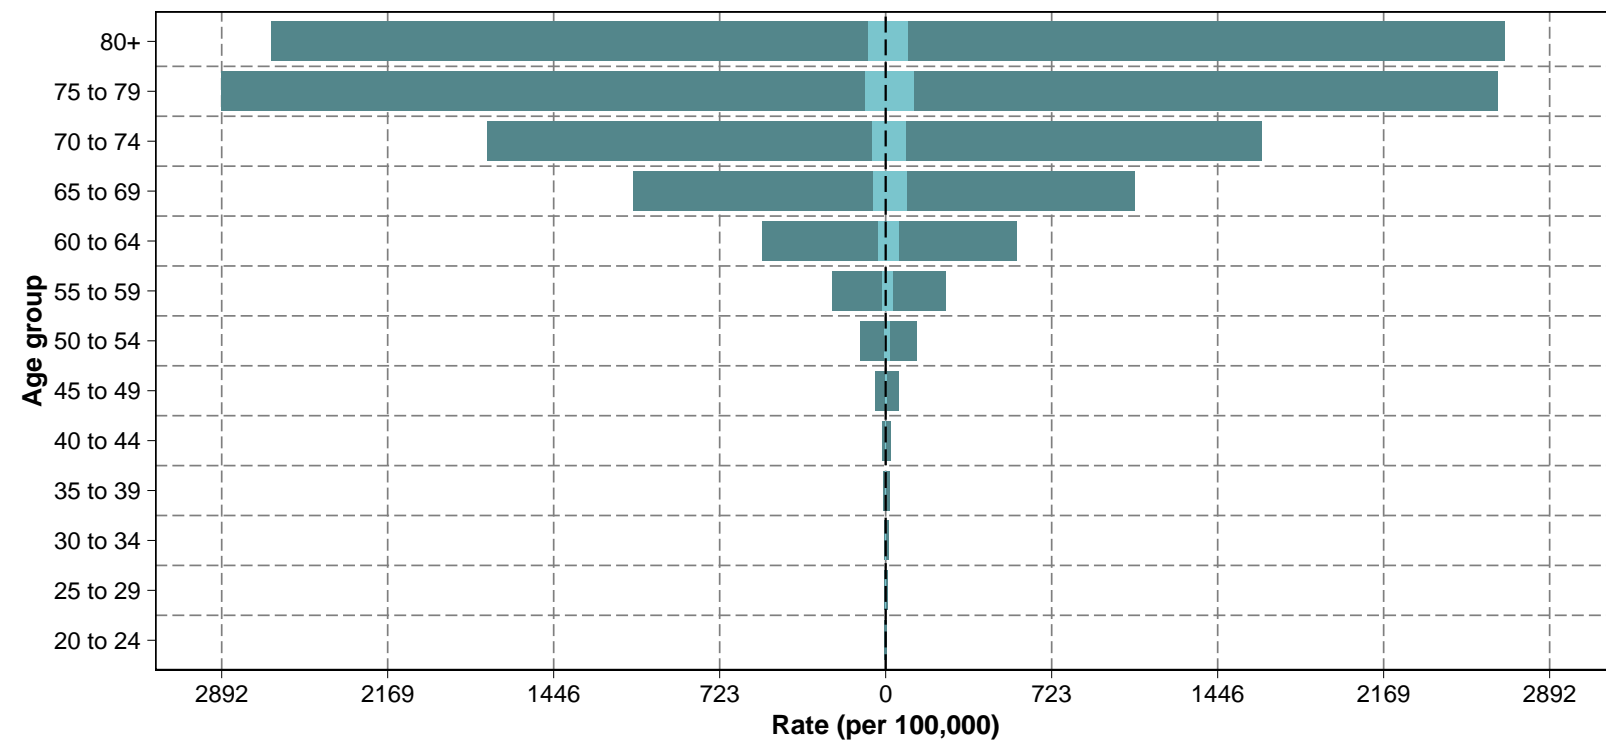

# Yemen

**Incidence**  
1990 2019

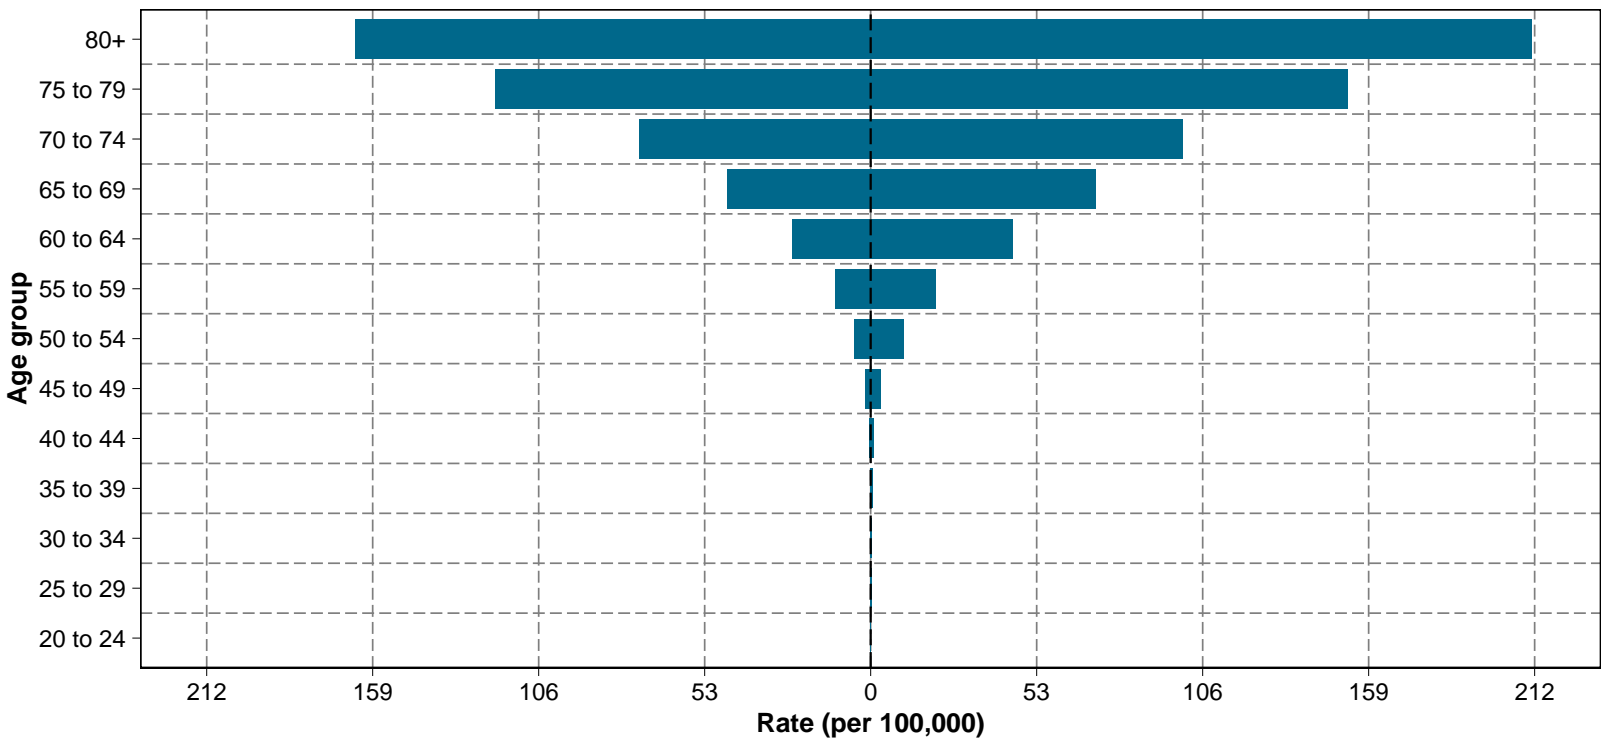

**Prevalence**  
1990 2019

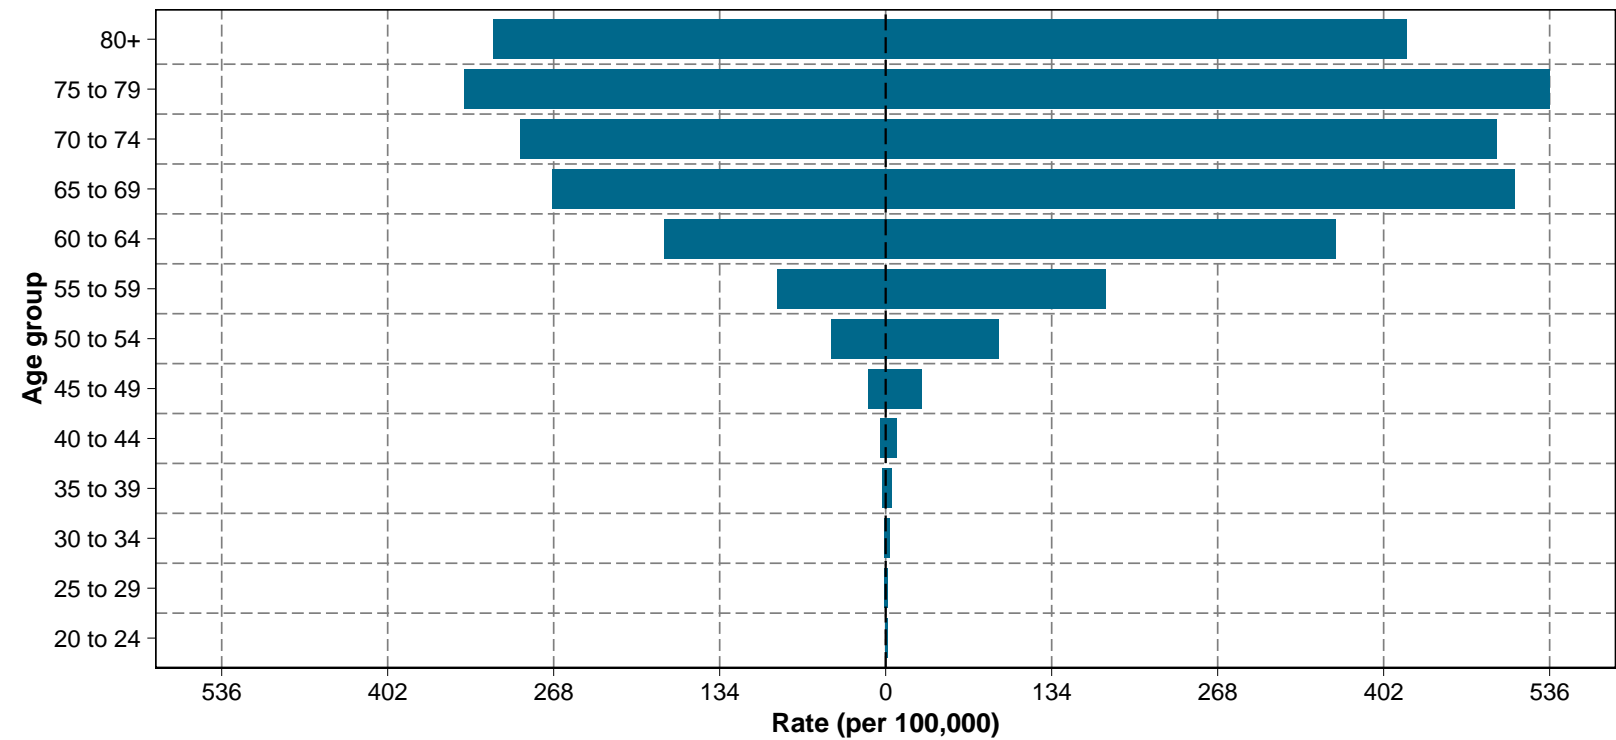

**Deaths**  
1990 2019

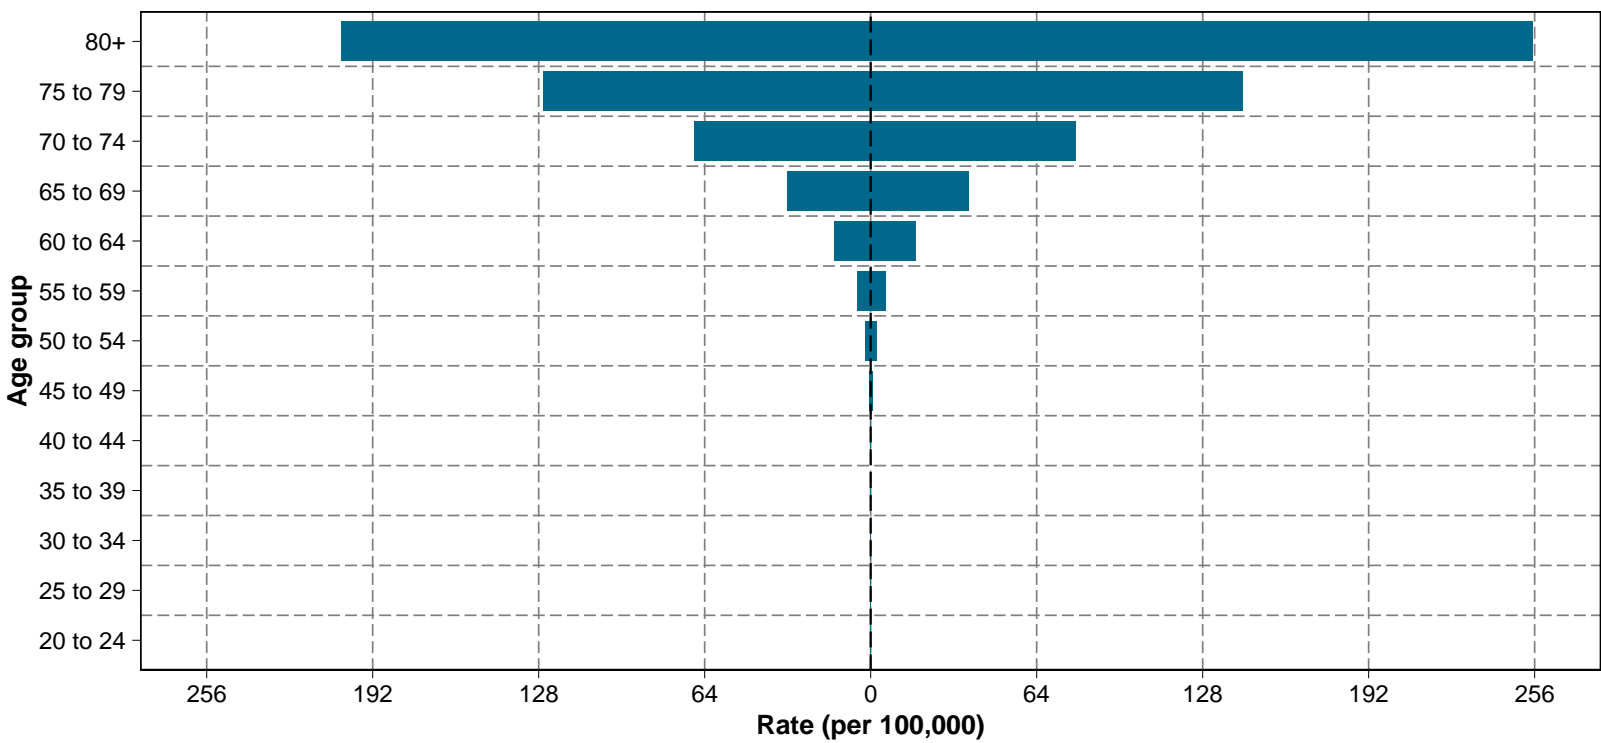

**DALYs**  
1990 2019

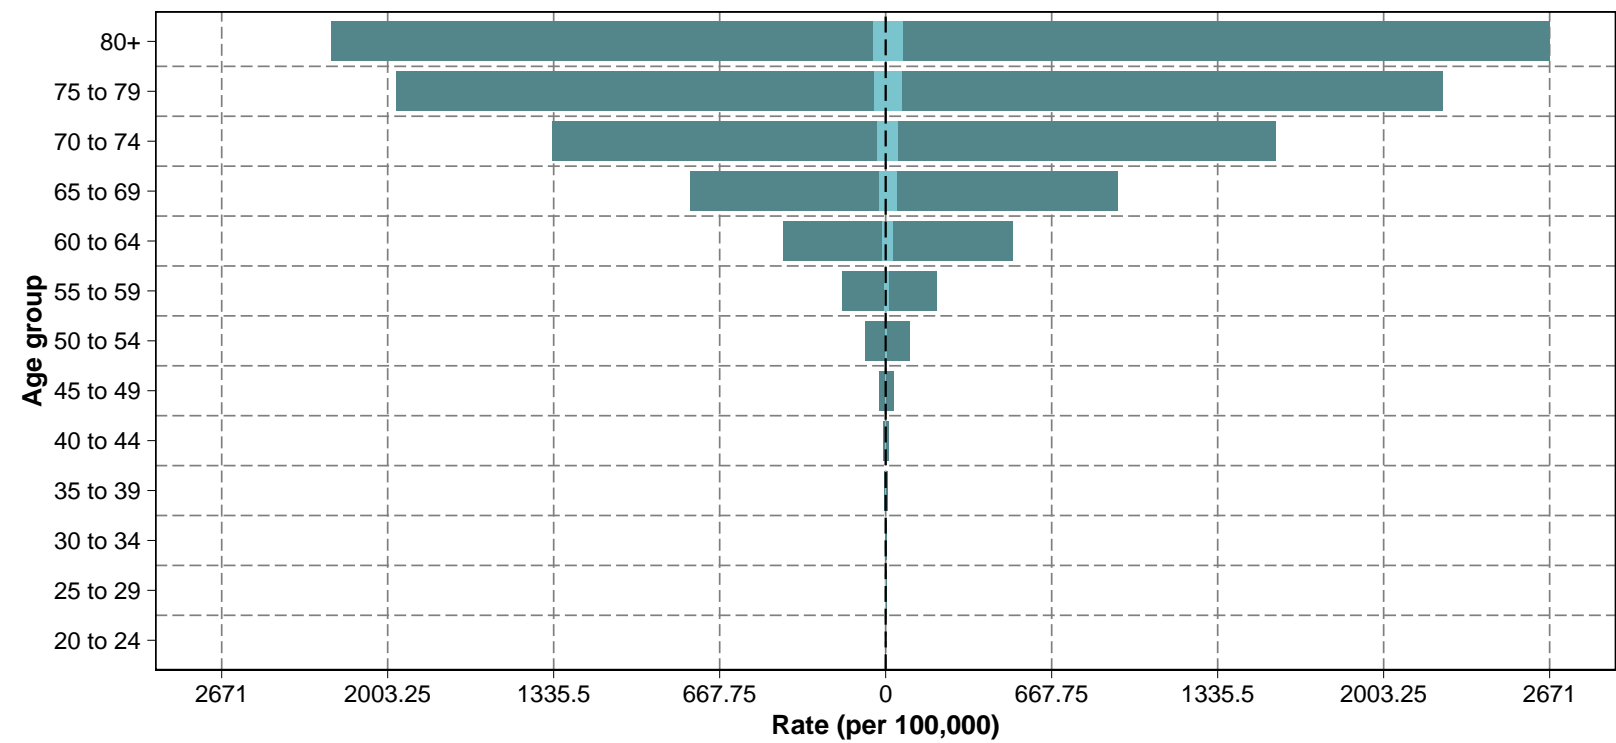

1990

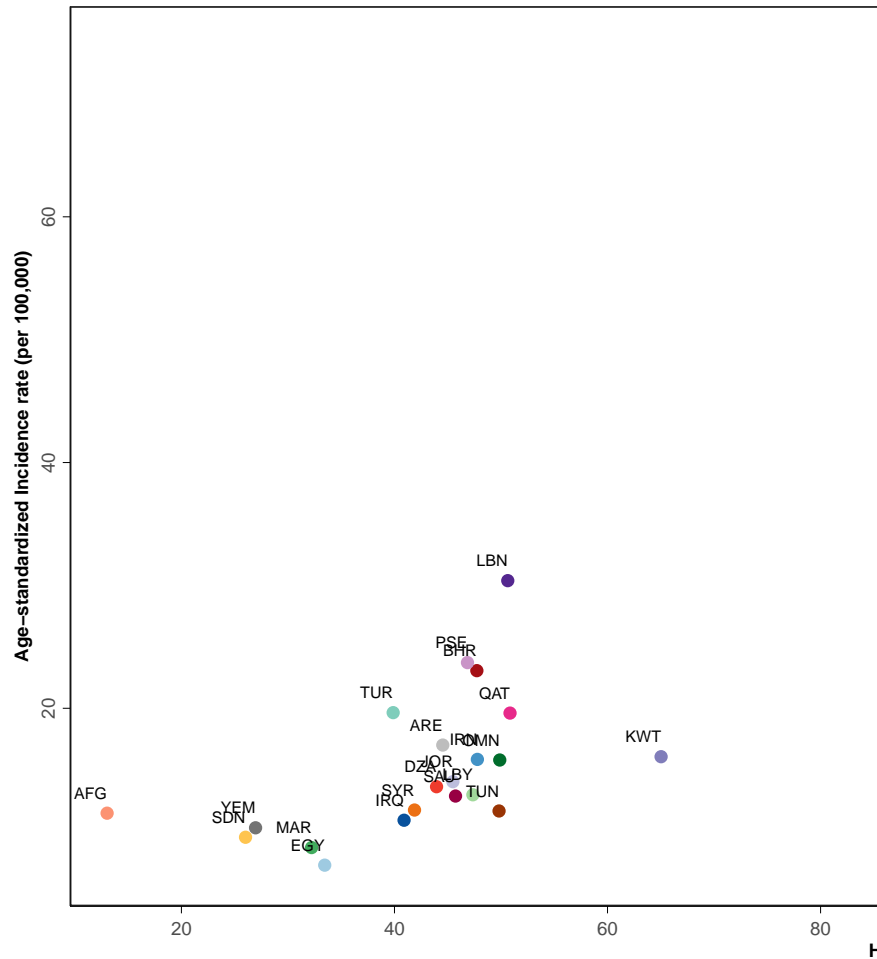

2019

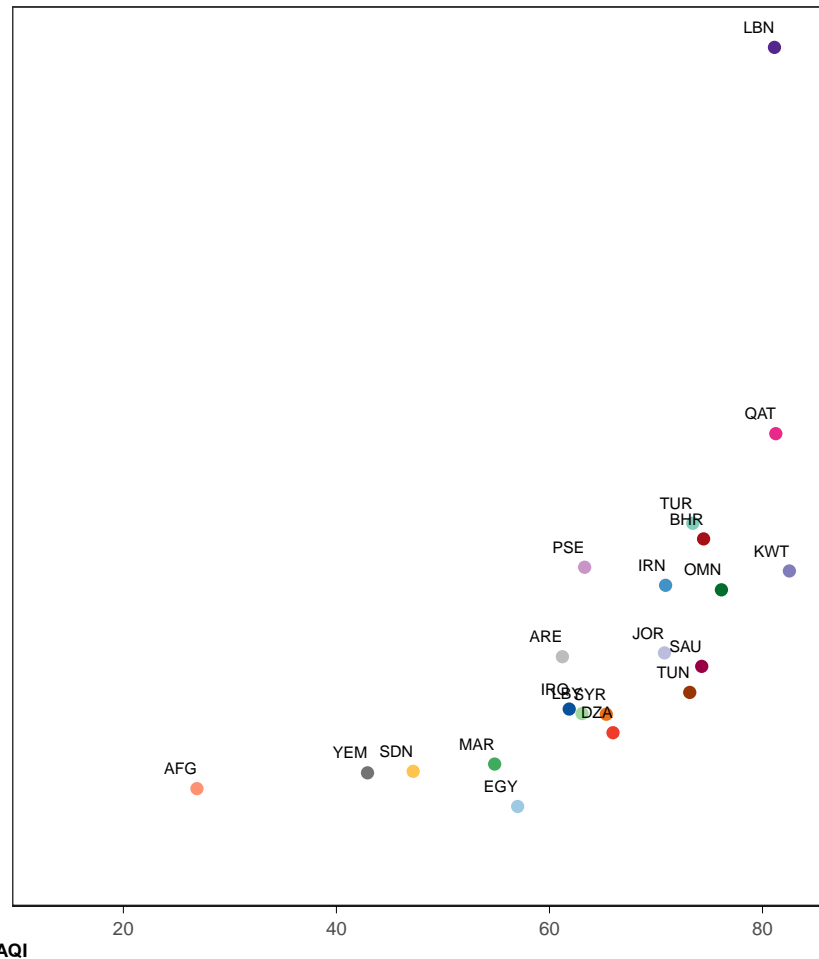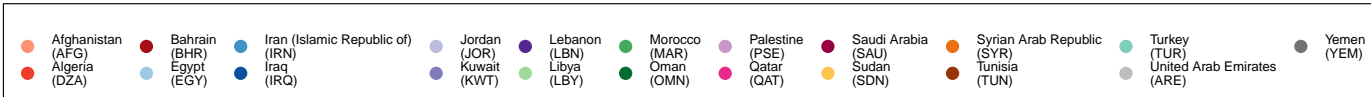

1990

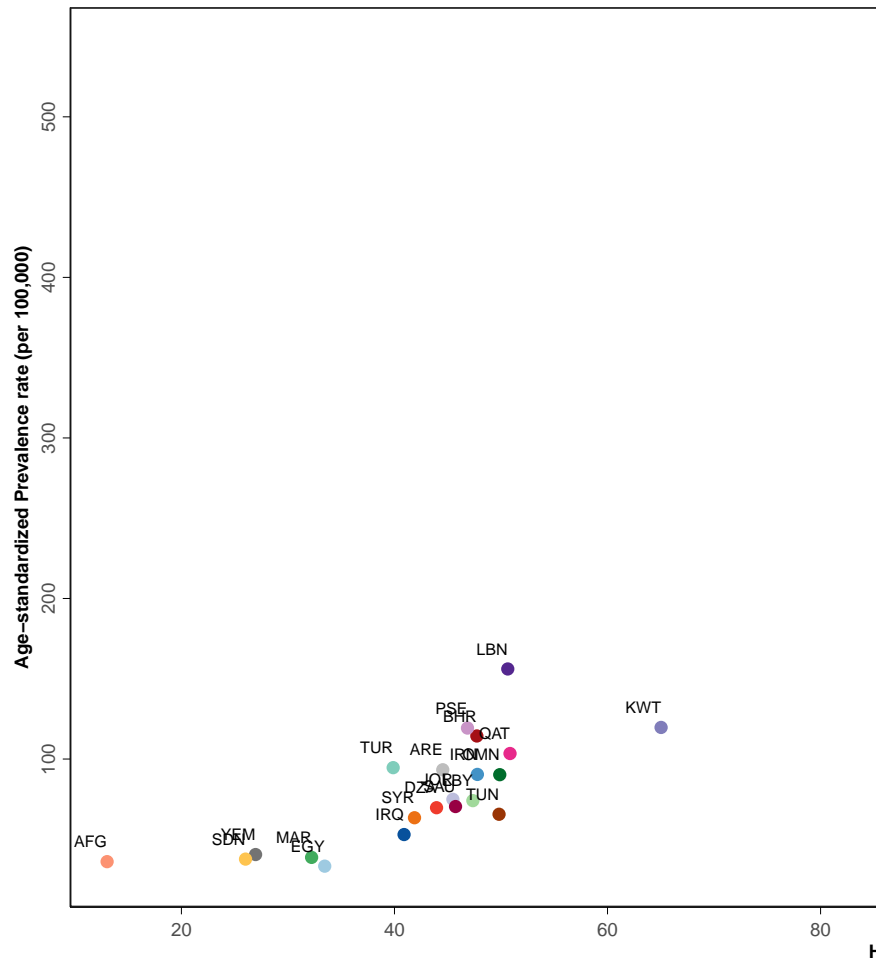

2019

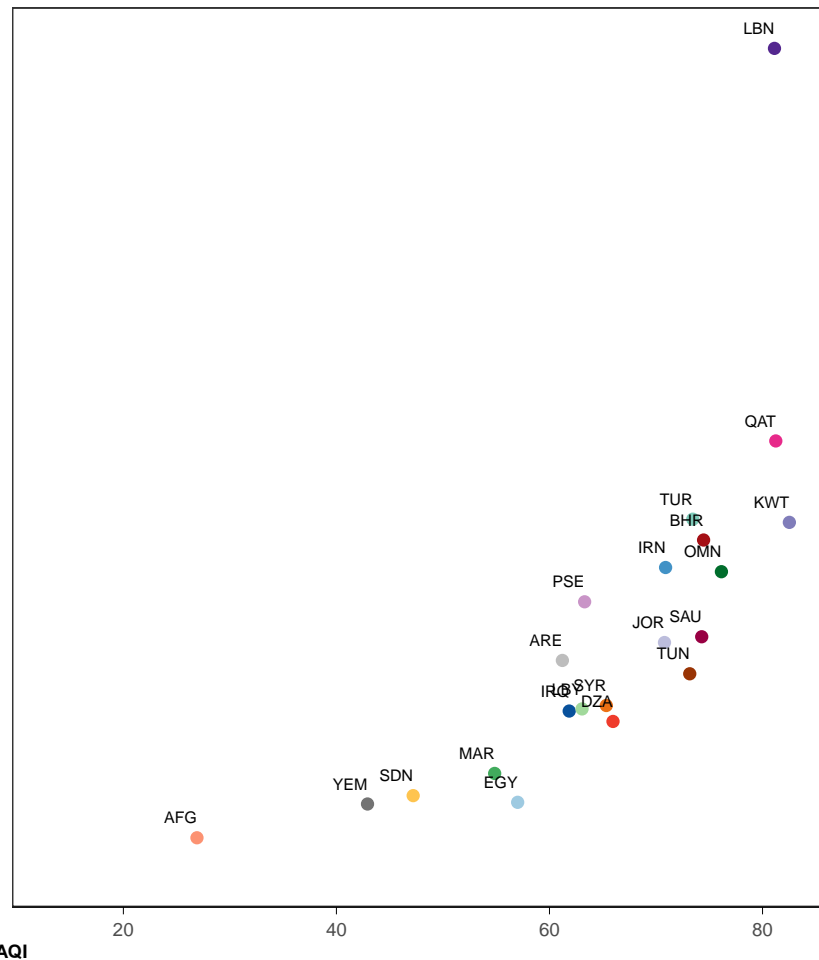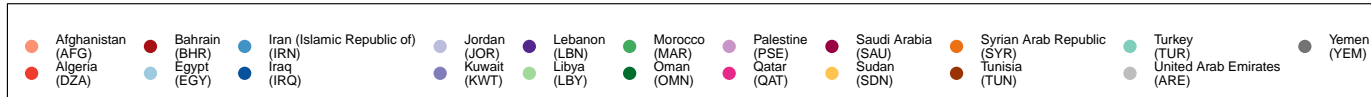

1990

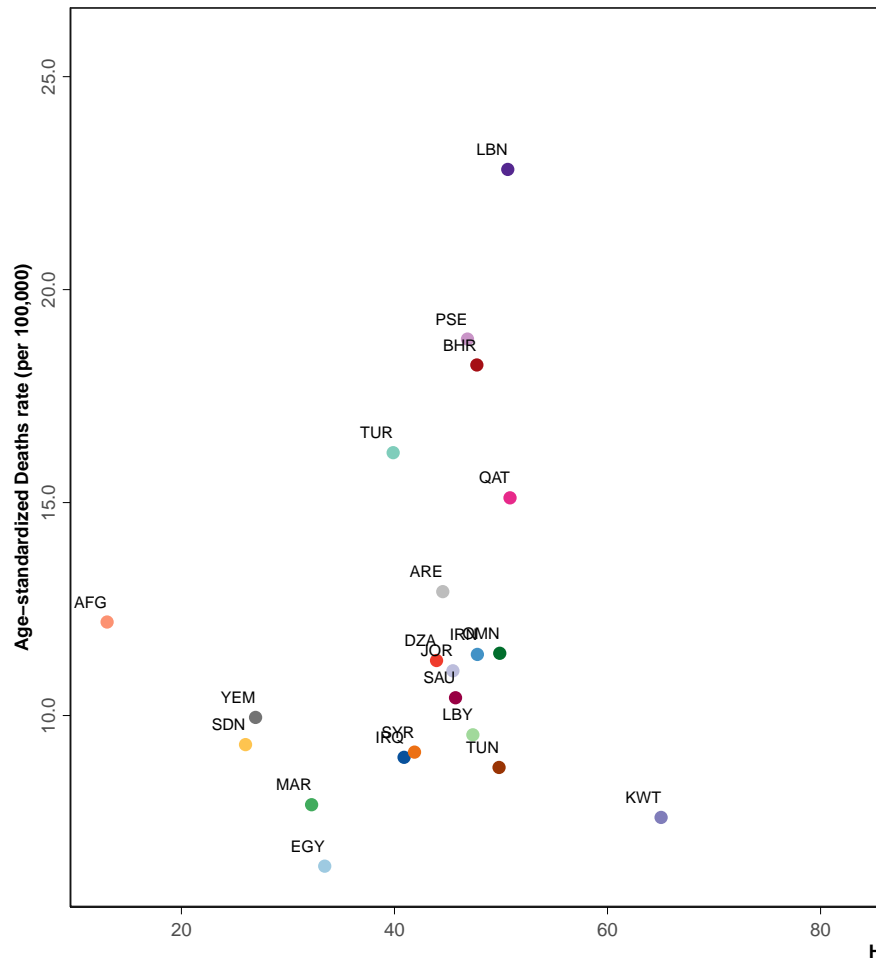

2019

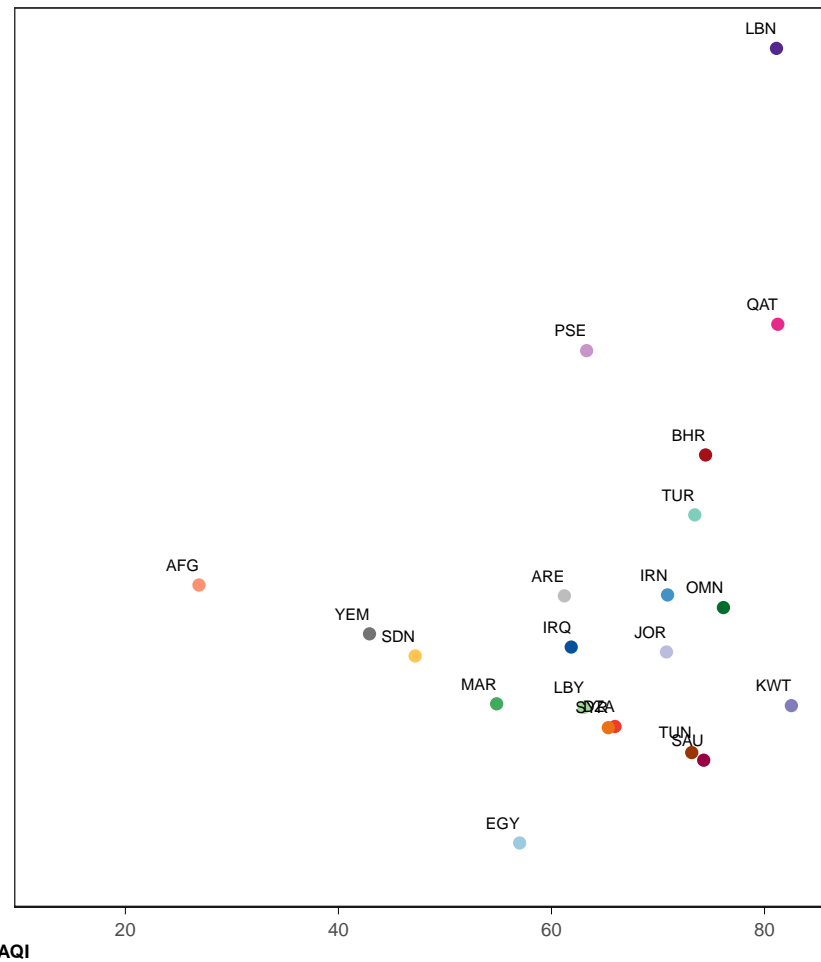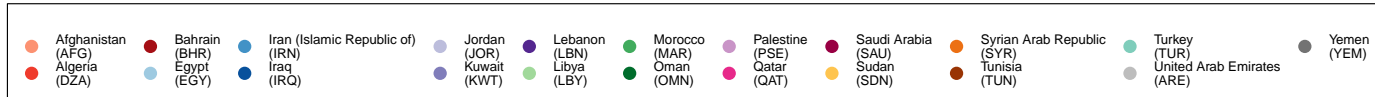

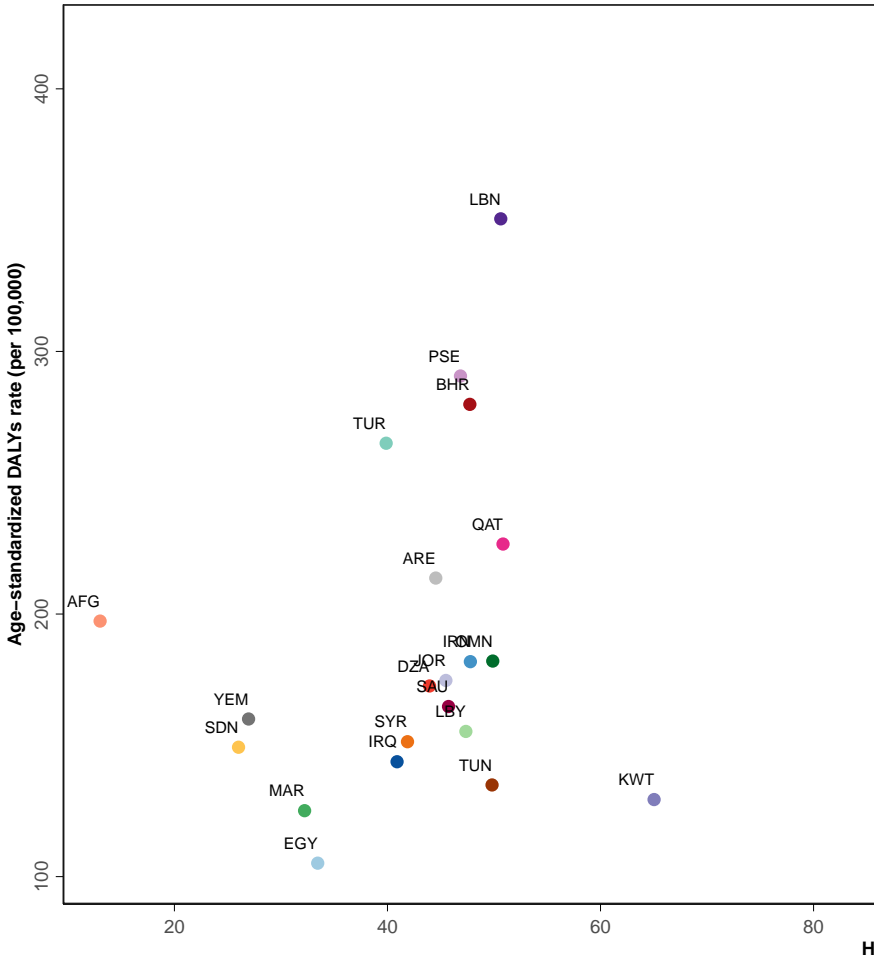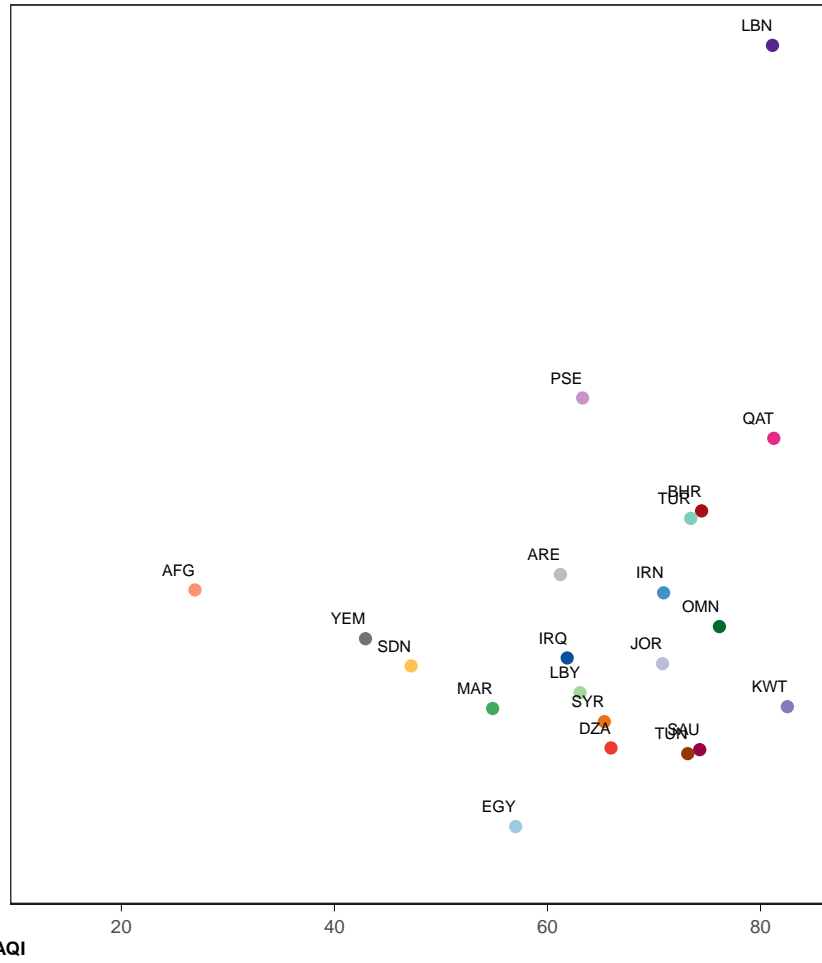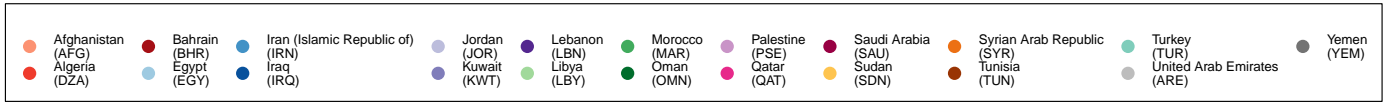

Supplement: DataSheet_1.pdf [file DataSheet_1.pdf]
